# Supplementary material
Source: PubMed Central journal article supplement (PMC3195313)

**Supporting Information for:**

**Preparation of Nucleosides Derived from 2-Nitroimidazole and D-Arabinose, D-Ribose and D-Galactose by the Vorbrüggen Method and their Conversion to Potential Precursors for Tracers to Image Hypoxia**

Anna Schweifer (Deceased Dec. 29th, 2010) and Friedrich Hammerschmidt\*

*Institute of Organic Chemistry, University of Vienna, Währingerstrasse 38,*

*A-1090 Vienna, Austria*

[friedrich.hammerschmidt@univie.ac.at](mailto:friedrich.hammerschmidt@univie.ac.at)

Table of Contents

|                                                                                                                  |          |
|------------------------------------------------------------------------------------------------------------------|----------|
| <sup>1</sup> H and <sup>13</sup> C Spectrum ( <i>J</i> -modulated) of Compound <b><i>α</i>-7</b>                 | S3, S4   |
| <sup>13</sup> C Spectrum of Compound <b><i>α</i>-7</b>                                                           | S5       |
| <sup>1</sup> H and <sup>13</sup> C Spectrum ( <i>J</i> -modulated) of Compound <b>10</b>                         | S6, S7   |
| <sup>1</sup> H and <sup>13</sup> C Spectrum ( <i>J</i> -modulated) of Compounds <b><i>α</i>- and <i>β</i>-14</b> | S8, S9   |
| <sup>1</sup> H and <sup>13</sup> C Spectrum ( <i>J</i> -modulated) of Compound <b><i>α</i>-14</b>                | S10, S11 |
| <sup>1</sup> H and <sup>13</sup> C Spectrum ( <i>J</i> -modulated) of Compound <b><i>α</i>-15</b>                | S12, S13 |
| <sup>13</sup> C Spectrum of Compound <b><i>α</i>-15</b>                                                          | S14      |
| <sup>1</sup> H and <sup>13</sup> C Spectrum ( <i>J</i> -modulated) of Compound <b><i>α</i>-17</b>                | S15, S16 |
| <sup>1</sup> H and <sup>13</sup> C Spectrum ( <i>J</i> -modulated) of Compound <b><i>β</i>-17</b>                | S17, S18 |
| <sup>1</sup> H and <sup>13</sup> C Spectrum ( <i>J</i> -modulated) of Compound <b><i>α</i>-18</b>                | S19, S20 |
| <sup>13</sup> C Spectrum of Compound <b><i>α</i>-18</b>                                                          | S21      |
| <sup>1</sup> H and <sup>13</sup> C Spectrum ( <i>J</i> -modulated) of Compound <b><i>β</i>-18</b>                | S22, S23 |
| <sup>13</sup> C Spectrum of Compound <b><i>β</i>-18</b>                                                          | S24      |
| <sup>1</sup> H and <sup>13</sup> C Spectrum ( <i>J</i> -modulated) of Compound <b><i>α</i>-20</b>                | S25, S26 |
| <sup>13</sup> C Spectrum of Compound <b><i>α</i>-20</b>                                                          | S27      |
| <sup>1</sup> H and <sup>13</sup> C Spectrum ( <i>J</i> -modulated) of Compound <b><i>β</i>-20</b>                | S28, S29 |
| <sup>13</sup> C Spectrum of Compound <b><i>β</i>-20</b>                                                          | S30      |
| <sup>1</sup> H and <sup>13</sup> C Spectrum ( <i>J</i> -modulated) of Compound <b><i>β</i>-22</b>                | S31, S32 |
| <sup>13</sup> C Spectrum of Compound <b><i>β</i>-22</b>                                                          | S33      |
| <sup>1</sup> H and <sup>13</sup> C Spectrum ( <i>J</i> -modulated) of Compound <b><i>α</i>-23</b>                | S34, S35 |
| <sup>13</sup> C Spectrum of Compound <b><i>α</i>-23</b>                                                          | S36      |

|                                                                                                   |          |
|---------------------------------------------------------------------------------------------------|----------|
| $^1\text{H}$ and $^{13}\text{C}$ Spectrum ( <i>J</i> -modulated) of Compound $\alpha$ - <b>24</b> | S37, S38 |
| $^1\text{H}$ and $^{13}\text{C}$ Spectrum ( <i>J</i> -modulated) of Compound $\alpha$ - <b>25</b> | S39, S40 |
| $^{13}\text{C}$ Spectrum of Compound $\alpha$ - <b>25</b>                                         | S41      |
| $^1\text{H}$ and $^{13}\text{C}$ Spectrum ( <i>J</i> -modulated) of Compound $\beta$ - <b>25</b>  | S42, S43 |
| $^{13}\text{C}$ Spectrum of Compound $\beta$ - <b>25</b>                                          | S44      |
| $^1\text{H}$ and $^{13}\text{C}$ Spectrum ( <i>J</i> -modulated) of Compound $\alpha$ - <b>26</b> | S45, S46 |
| $^{13}\text{C}$ Spectrum of Compound $\alpha$ - <b>26</b>                                         | S47      |
| $^1\text{H}$ and $^{13}\text{C}$ Spectrum ( <i>J</i> -modulated) of Compound $\beta$ - <b>26</b>  | S48, S49 |
| $^{13}\text{C}$ Spectrum of Compound $\beta$ - <b>26</b>                                          | S50      |
| $^1\text{H}$ and $^{13}\text{C}$ Spectrum ( <i>J</i> -modulated) of Compound $\alpha$ - <b>27</b> | S51, S52 |
| $^{13}\text{C}$ Spectrum of Compound $\alpha$ - <b>27</b>                                         | S53      |
| $^1\text{H}$ and $^{13}\text{C}$ Spectrum ( <i>J</i> -modulated) of Compound $\beta$ - <b>27</b>  | S54, S55 |
| $^{13}\text{C}$ Spectrum of Compound $\beta$ - <b>27</b>                                          | S56      |
| $^1\text{H}$ and $^{13}\text{C}$ Spectrum ( <i>J</i> -modulated) of Compound $\alpha$ - <b>30</b> | S57, S58 |
| $^{13}\text{C}$ Spectrum of Compound $\alpha$ - <b>27</b>                                         | S59      |

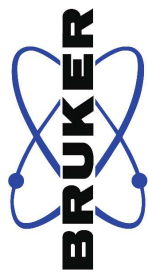

Current Data Parameters  
NAME AW548\_Alpha  
EXPNO 80  
PROCNO 1

F2 - Acquisition Parameters  
Date\_ 20040819  
Time\_ 18.27  
INSTRUM advance400  
PROBHD 5 mm PABBO BB-  
PULPROG zg30  
TD 65536  
SOLVENT CDCl3  
NS 16  
DS 2  
SWH 8278.146 Hz  
FIDRES 0.126314 Hz  
AQ 3.9584243 sec  
RG 203.2  
DM 60.400 usec  
DE 6.00 usec  
TE 300.0 K  
D1 1.00000000 sec

==== CHANNEL f1 =====  
NUC1 IH  
P1 8.75 usec  
PL1 -3.00 dB  
SFO1 400.1324710 MHz  
F2 - Processing parameters  
SI 32768  
SF 400.1300173 MHz  
WDW no  
SSB 0  
LB 0 Hz  
GB 0  
PC 1.00

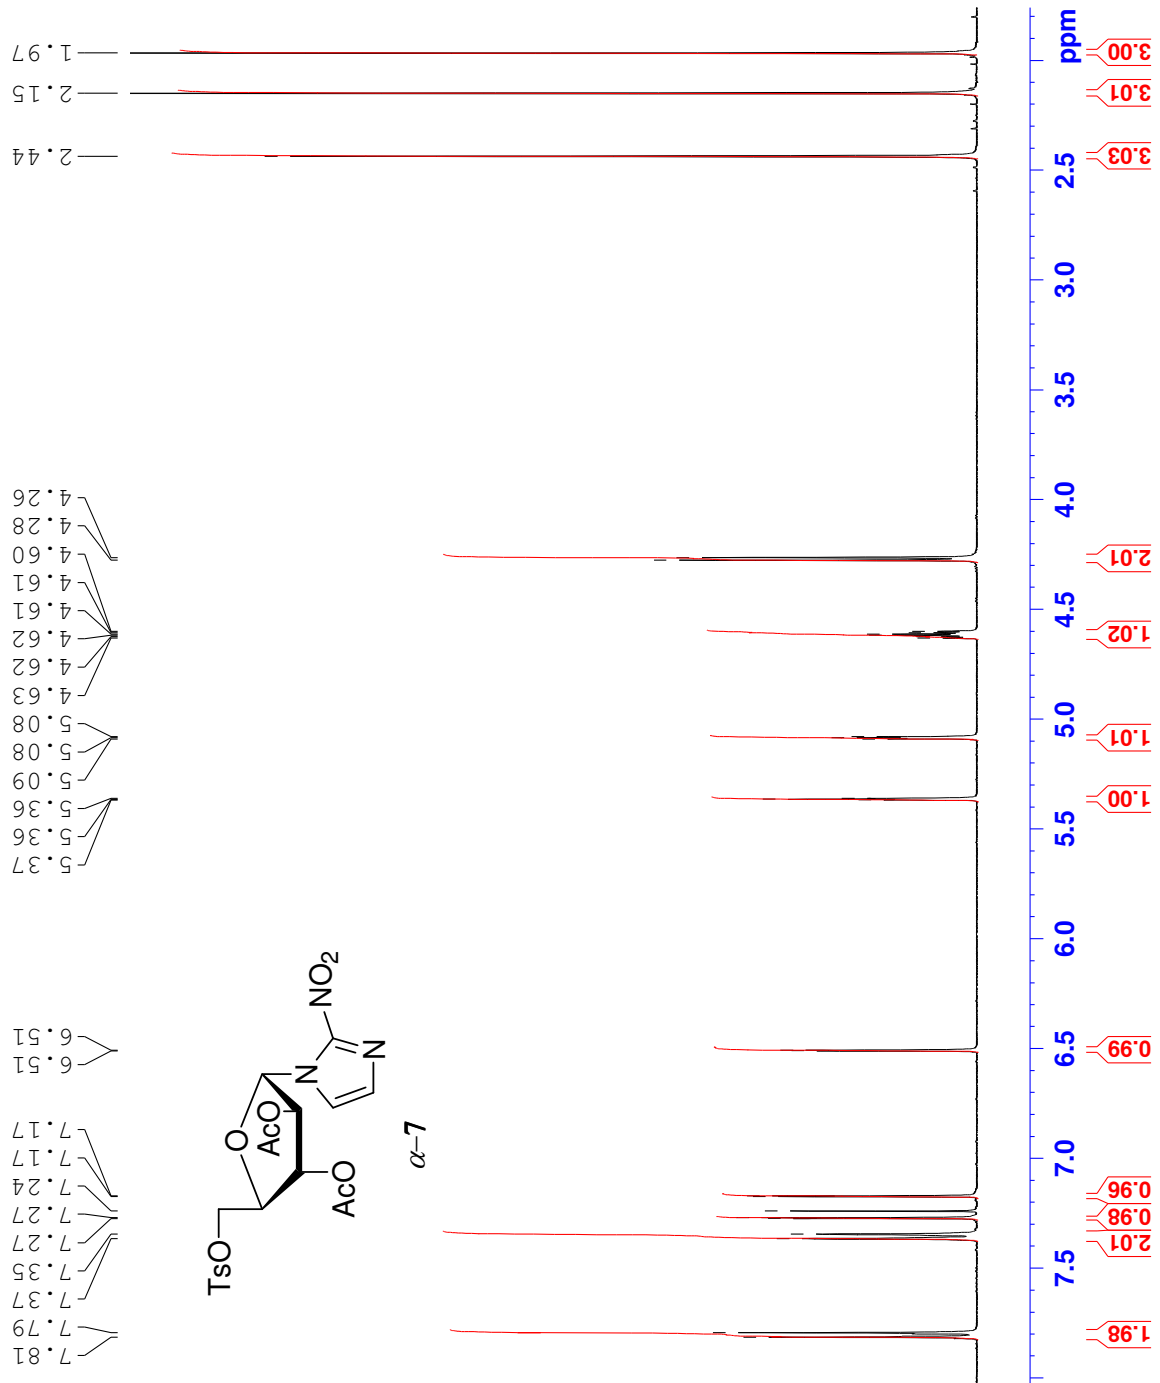

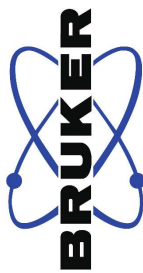

Current Data Parameters  
NAME AW548\_Alpha  
EXPNO 170  
PROCNO 1

F2 - Acquisition Parameters  
Date\_ 20040901  
Time 21.23  
INSTRUM advance400  
PROBHD 5 mm PABBO BB-  
PULPROG jmod  
TD 65536  
SOLVENT CDCl3  
NS 800  
DS 2  
SWH 25062.656 Hz  
FIDRES 0.382426 Hz  
AQ 1.3074932 sec  
RG 14596.5  
DW 19.950 usec  
DE 6.00 usec  
TE 300.0 K  
CNST2 145.000000  
CNST11 1.000000  
D1 2.0000000 sec  
d13 0.0000300 sec  
d20 0.00689655 sec  
DELTA 0.00001311 sec

==== CHANNEL f1 =====  
NUC1 13C  
P1 10.30 usec  
P2 20.60 usec  
PL1 -1.00 dB  
SFO1 100.6232933 MHz

==== CHANNEL f2 =====  
CPDPRG2 waltz16  
NUC2 1H  
PCPD2 100.00 usec  
PL2 -3.00 dB  
PL12 16.00 dB  
SFO2 400.1316005 MHz

F2 - Processing parameters  
SI 32768  
SF 100.6127726 MHz  
WDW no  
SSB 0  
LB 0 Hz  
GB 0  
PC 1.40

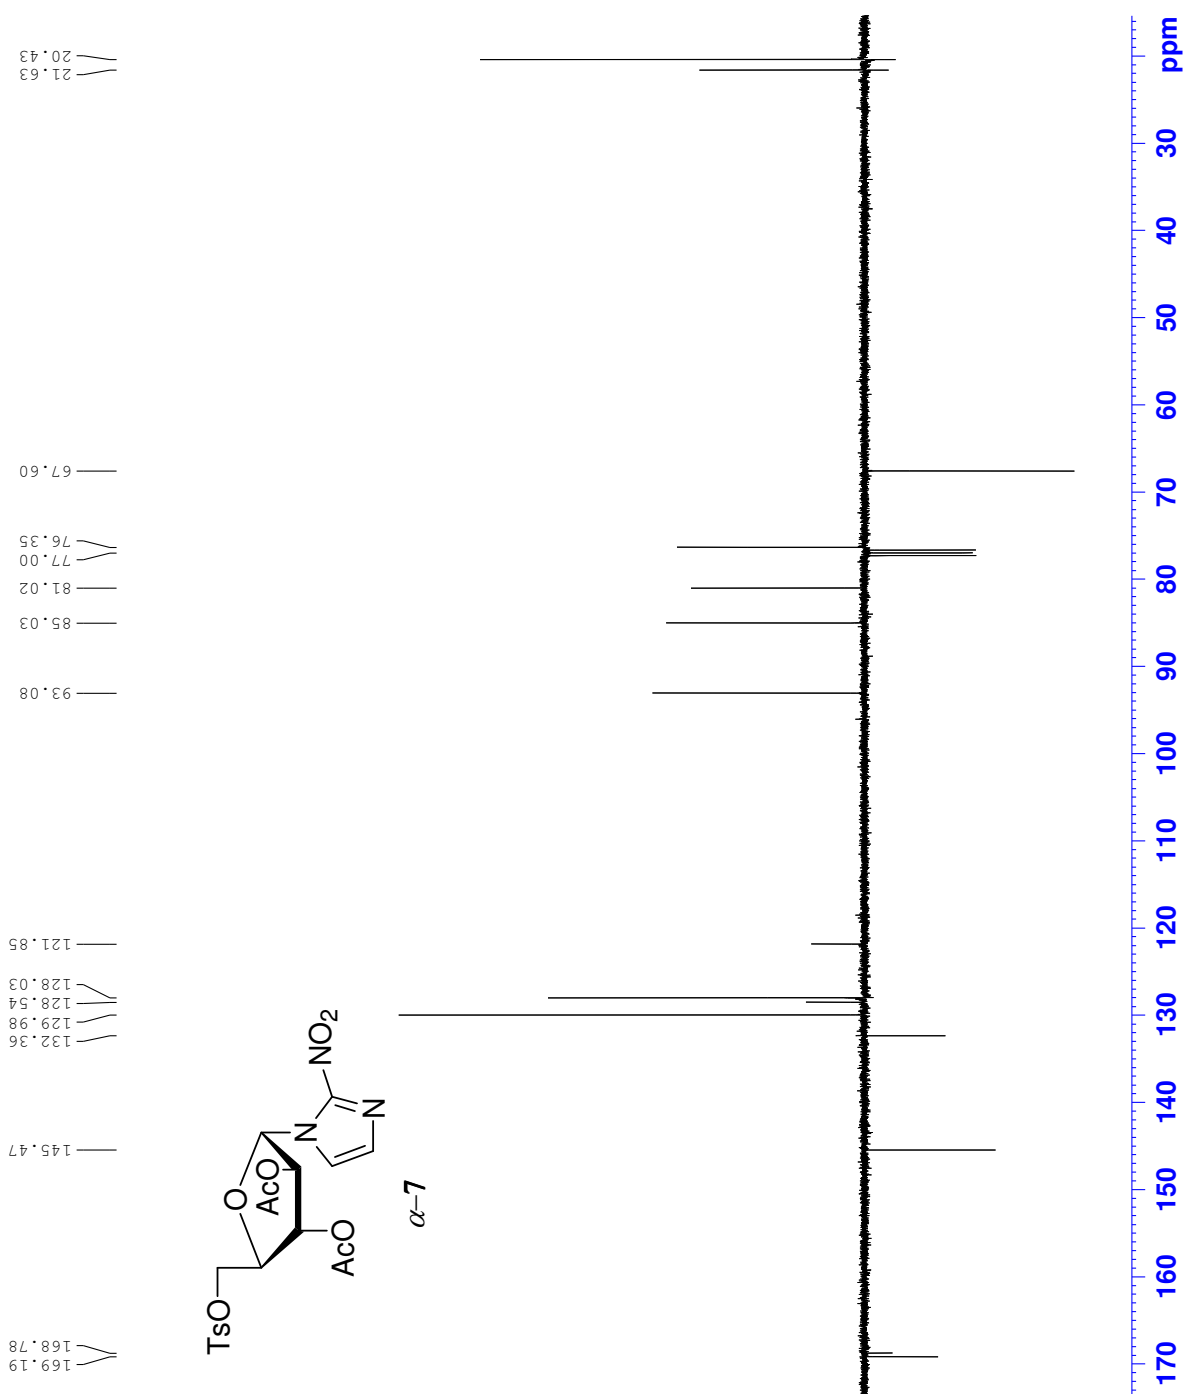

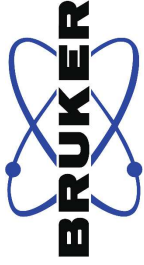

20.68  
21.88

67.84  
76.59  
76.92  
77.24  
77.56  
81.25  
85.27  
93.33

122.09  
128.26  
128.78  
130.23  
132.58

145.71

169.44  
169.01

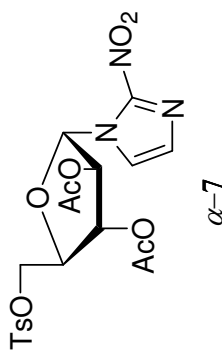

Current Data Parameters  
 NAME AWS48\_Alpha  
 EXPNO 171  
 PROCNO 1

F2 - Acquisition Parameters  
 Date\_ 20040901  
 Time 22.10  
 INSTRUM avance400  
 PROBHD 5 mm PABBO BB-  
 PULPROG zgpg30  
 TD 65536  
 SOLVENT CDC13  
 NS 800  
 DS 4  
 SWH 23980.814 Hz  
 FIDRES 0.365918 Hz  
 AQ 1.3664756 sec  
 RG 7298.2  
 DW 20.850 usec  
 DE 6.00 usec  
 TE 300.0 K  
 D1 2.00000000 sec  
 d11 0.03000000 sec  
 d12 0.00002000 sec

==== CHANNEL f1 =====  
 NUC1 13C  
 P1 10.30 usec  
 PL1 -1.00 dB  
 SFO1 100.6228298 MHz

==== CHANNEL f2 =====  
 CPDPRG2 waltz16  
 NUC2 1H  
 FCPD2 100.00 usec  
 PL2 -3.00 dB  
 PL12 16.00 dB  
 PL13 20.00 dB  
 SFO2 400.1316005 MHz

F2 - Processing parameters  
 SI 32768  
 SF 100.6127487 MHz  
 WDW no  
 SSB 0  
 GB 0 Hz  
 PC 1.40

ppm

(Et<sub>3</sub>Si)<sub>2</sub>NH  
10

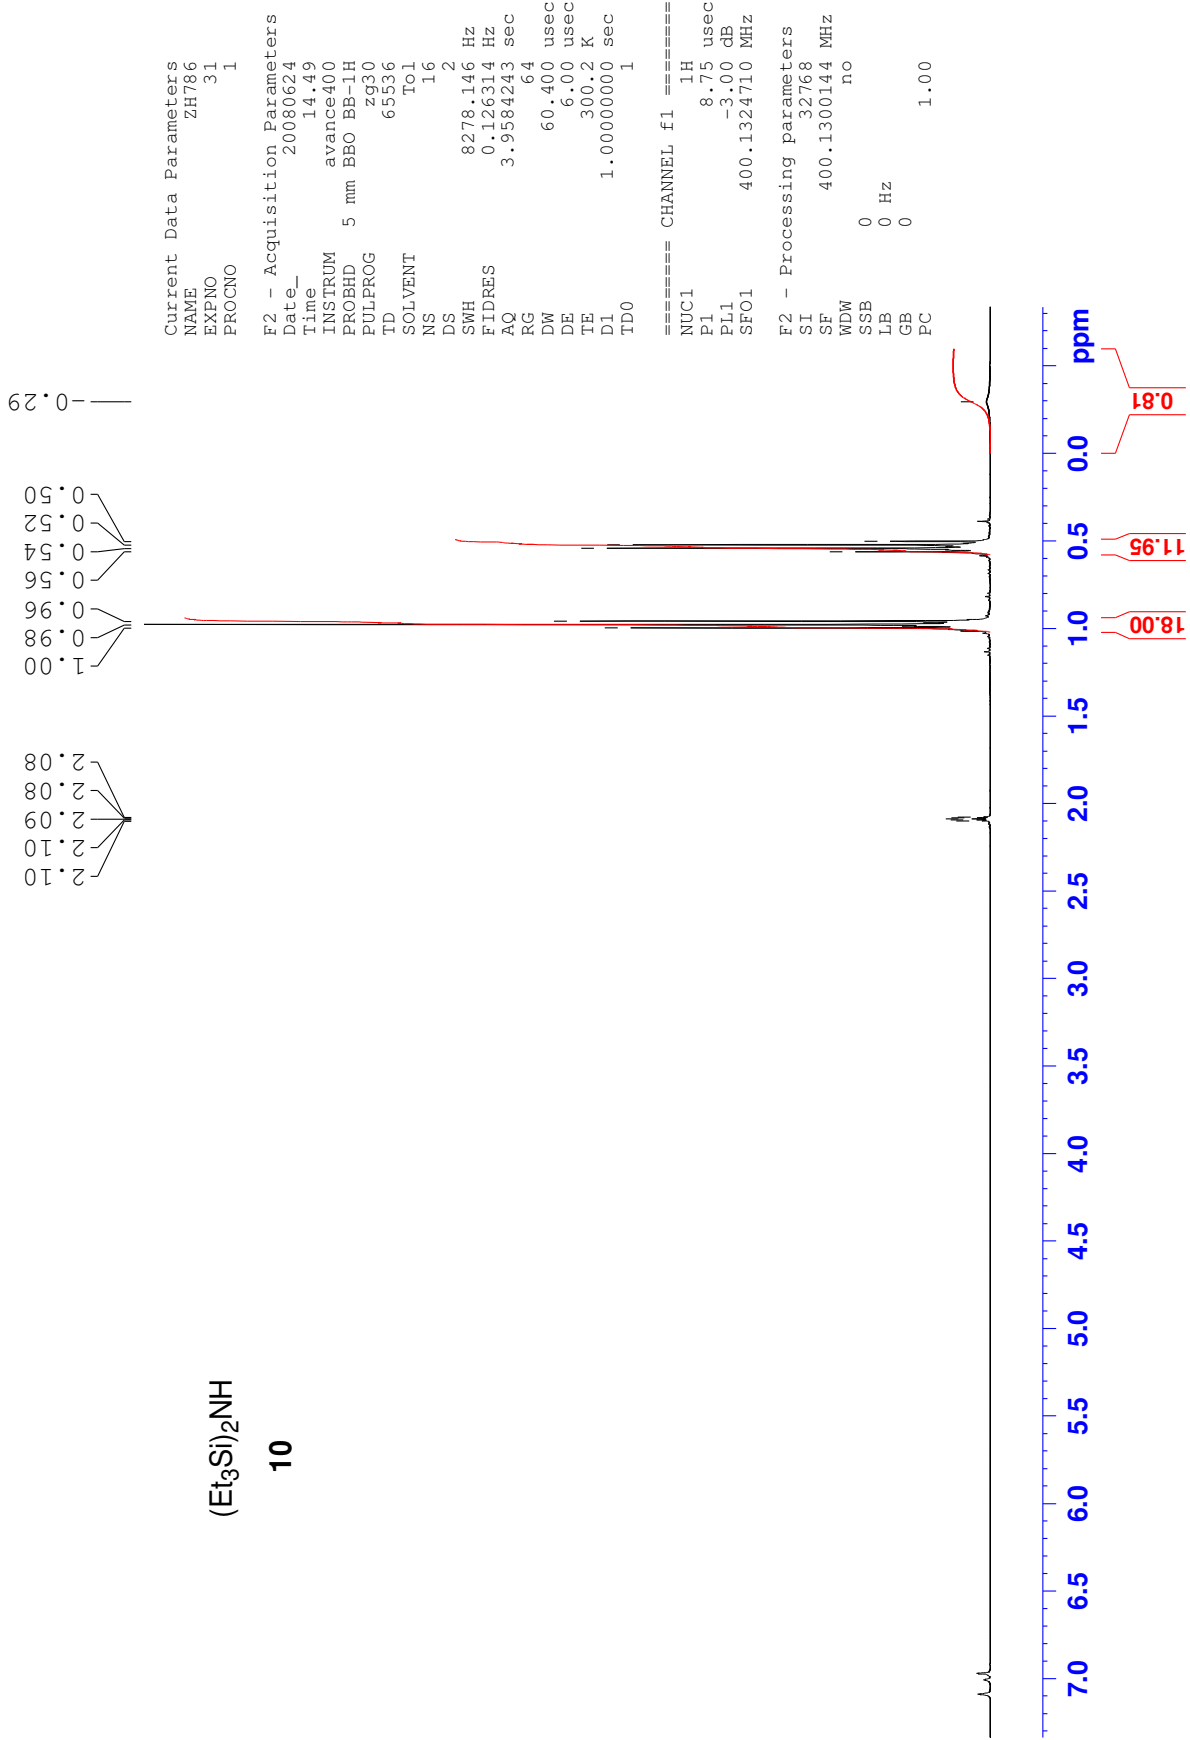

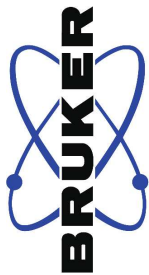

21.78  
21.59  
21.40  
21.21  
21.01  
8.45  
7.97

(Et<sub>3</sub>Si)<sub>2</sub>NH  
10

Current Data Parameters  
NAME ZH786  
EXPNO 30  
PROCNO 1

F2 - Acquisition Parameters  
Date\_ 20080624  
Time\_ 14.46  
INSTRUM avance400  
PROBHD 5 mm BBO BB-1H  
PULPROG jmod  
TD 65536  
SOLVENT Tol  
NS 121  
DS 2  
SWH 25062.656 Hz  
FIDRES 0.382426 Hz  
AQ 1.3074932 sec  
RG 2298.8  
DW 19.950 usec  
DE 6.00 usec  
TE 300.2 K  
CNST2 145.0000000  
CNST11 1.0000000  
D1 2.00000000 sec  
d20 0.00689655 sec  
DELTA 0.00001311 sec  
TD0 1

==== CHANNEL f1 =====  
NUC1 13C  
P1 10.30 usec  
P2 20.60 usec  
PL1 -1.00 dB  
SFO1 100.6233329 MHz

==== CHANNEL f2 =====  
CPDPRG2 waltz16  
NUC2 1H  
PCPD2 100.00 usec  
PL2 -3.00 dB  
PL12 16.00 dB  
SFO2 400.1316005 MHz

F2 - Processing parameters  
SI 32768  
SF 100.6126296 MHz  
WDW no  
SSB 0  
LB 0 Hz  
GB 0  
PC 1.40

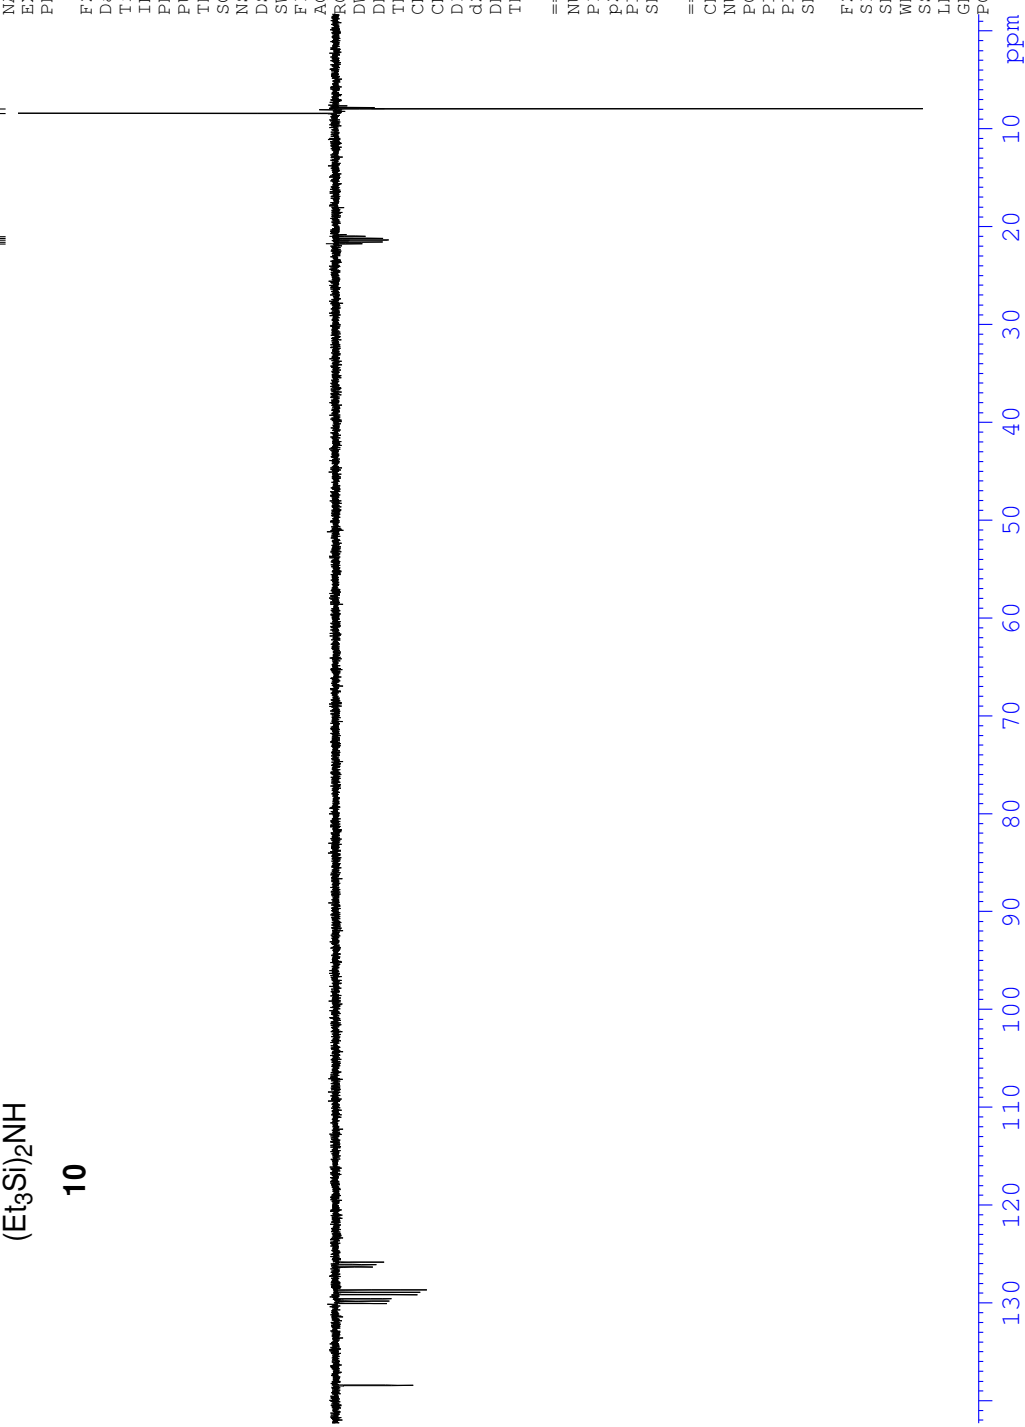

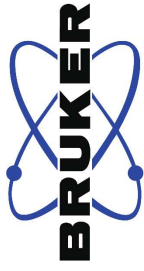

```

Current Data Parameters
NAME          AW585
EXPNO        80
PROCNO       1

F2 - Acquisition Parameters
Date_        20040921
Time         10.43
INSTRUM      avance400
PROBHD       5 mm PABBO BB-
PULPROG      zg30
TD           65536
SOLVENT      CDCl3
NS           16
DS           2
SWH          8278.146 Hz
FIDRES       0.126314 Hz
AQ           3.9584243 sec
RG           90.5
DW           60.400 usec
DE           6.00 usec
TE           300.0 K
D1           1.00000000 sec

===== CHANNEL f1 =====
NUC1         1H
P1           8.75 usec
PL1         -3.00 dB
SFO1        400.1324710 MHz

F2 - Processing parameters
SI           32768
SF          400.1300174 MHz
WDW          no
SSB          0
LB           0 Hz
GB           0
PC           1.00
  
```

1.06  
 1.88  
 2.02  
 2.04  
 2.05  
 2.09  
 2.10  
 2.10  
 2.34  
 3.79  
 3.81  
 3.81  
 3.82  
 3.83  
 3.85  
 3.86  
 3.86  
 3.87  
 3.88  
 3.90  
 3.91  
 4.09  
 4.11  
 4.12  
 4.14  
 4.14  
 4.22  
 4.24  
 4.25  
 4.26  
 5.20  
 5.20  
 5.21  
 5.21  
 5.32  
 5.34  
 5.34  
 5.35  
 5.36  
 5.38  
 5.38  
 5.38  
 5.38  
 5.60  
 5.62  
 5.62  
 5.63  
 6.19  
 6.35  
 6.36

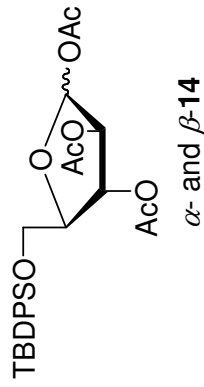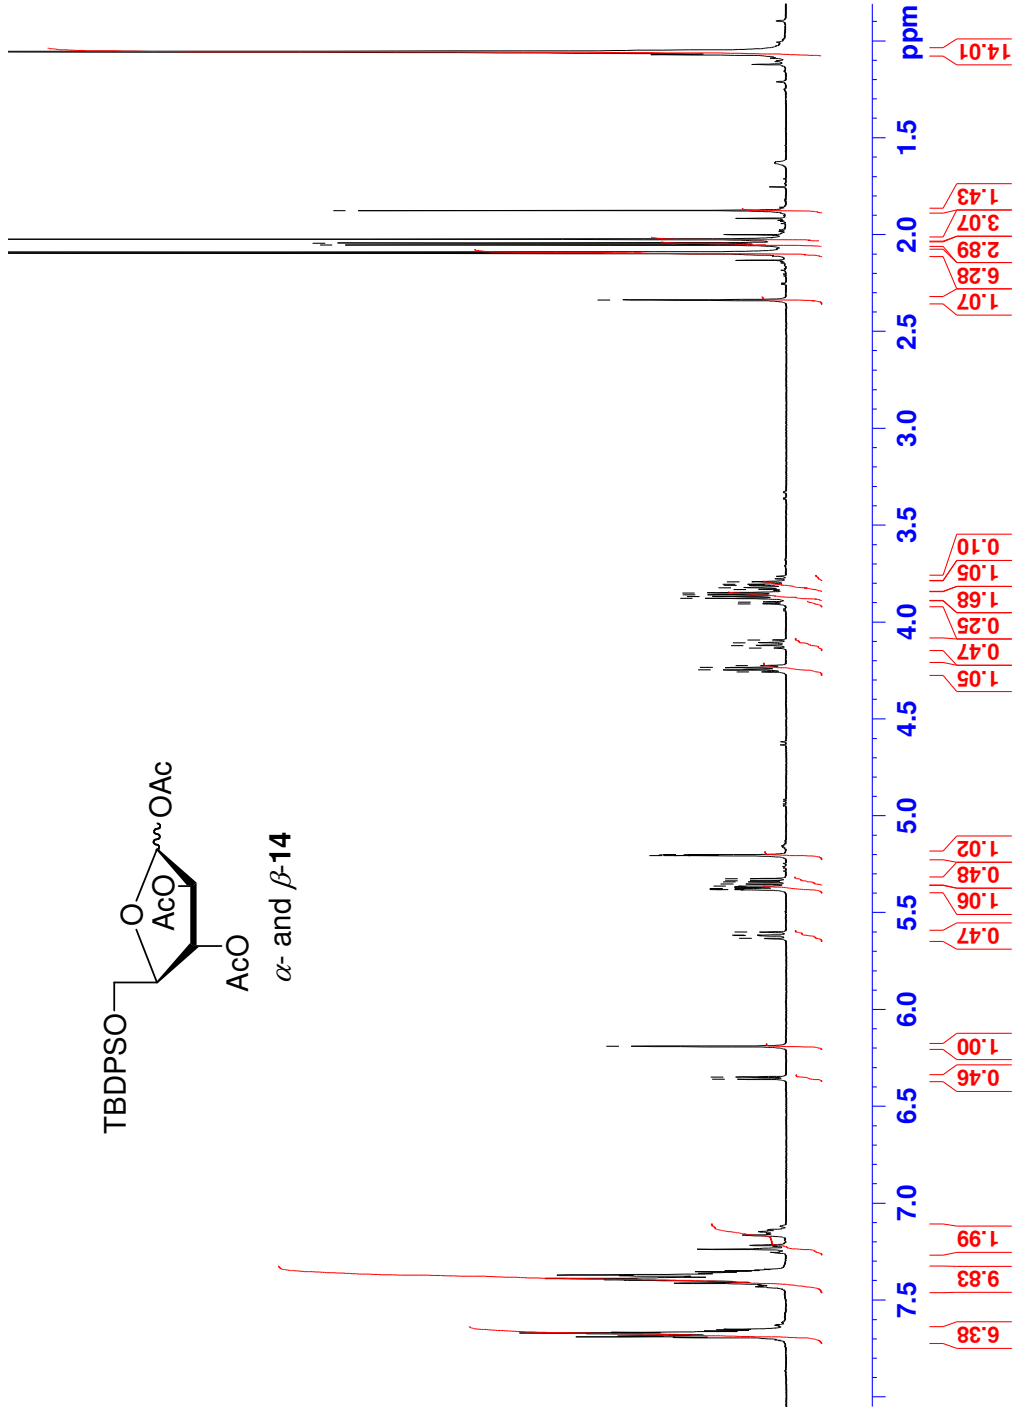



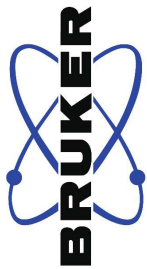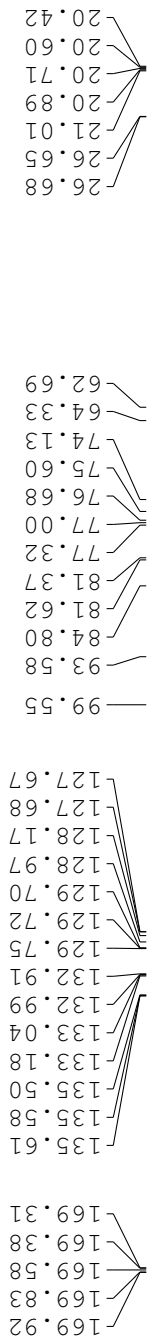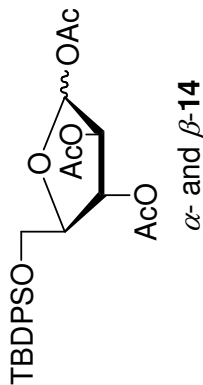

Current Data Parameters  
 NAME AW585  
 EXPNO 81  
 PROCNO 1

F2 - Acquisition Parameters  
 Date\_ 20040921  
 Time\_ 11-28  
 INSTRUM avance400  
 PROBHD 5 mm PABBO BB-  
 PULPROG jmod  
 TD 65536  
 SOLVENT CDC13  
 NS 800  
 DS 2  
 SWH 25062.656 Hz  
 FIDRES 0.382426 Hz  
 AQ 1.3074932 sec  
 RG 5160.6  
 DW 19.950 usec  
 DE 6.00 usec  
 TE 300.0 K  
 CNST2 145.0000000  
 CNST11 1.0000000  
 d1 2.00000000 sec  
 d13 0.00000300 sec  
 d20 0.00689655 sec  
 DELTA 0.00001311 sec

==== CHANNEL f1 =====  
 NUC1 13C  
 P1 10.30 usec  
 P2 20.60 usec  
 PL1 -1.00 dB  
 SF01 100.6232933 MHz

==== CHANNEL f2 =====  
 CPDPRG2 waltz16  
 NUC2 1H  
 PCPD2 100.00 usec  
 PL2 -3.00 dB  
 PL12 16.00 dB  
 SF02 400.1316005 MHz

F2 - Processing parameters  
 SI 32768  
 SF 100.6127755 MHz  
 WDW no  
 SSB 0 Hz  
 LB 0  
 GB 0  
 PC 1.40

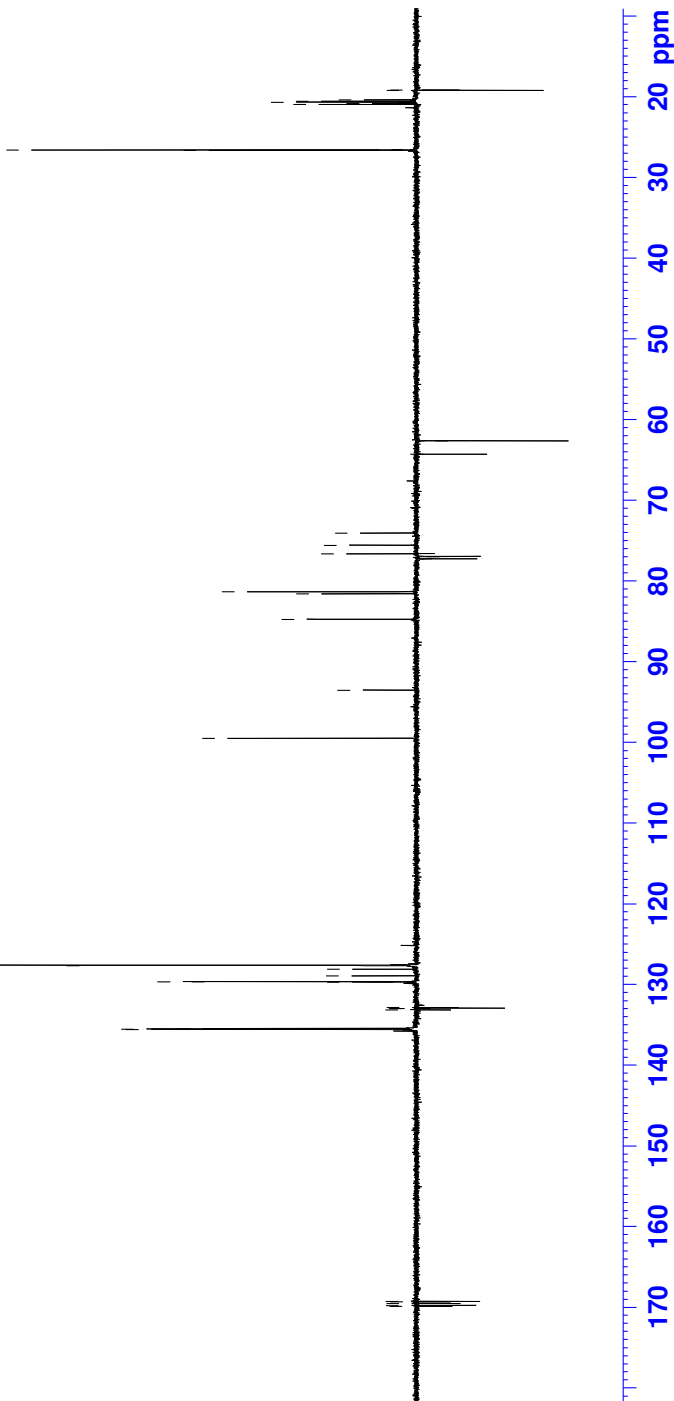

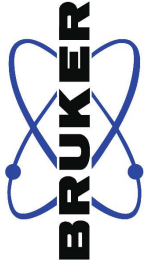

Current Data Parameters  
 NAME AW585\_Kristalle  
 EXPNO 20  
 PROCNO 1  
 F2 - Acquisition Parameters  
 Date\_ 20071126  
 Time 12.10  
 INSTRUM avance400  
 PROBHD 5 mm BBO BB-1H  
 PULPROG zg30  
 TD 65536  
 SOLVENT CDCl3  
 NS 16  
 DS 2  
 SWH 8278.146 Hz  
 FIDRES 0.126314 Hz  
 AQ 3.9584243 sec  
 RG 128  
 DW 60.400 usec  
 DE 6.00 usec  
 TE 300.2 K  
 D1 1.00000000 sec  
 TD0 1  
 ===== CHANNEL f1 =====  
 NUC1 1H  
 P1 8.75 usec  
 PL1 -3.00 dB  
 SFO1 400.1324710 MHz  
 F2 - Processing parameters  
 SI 32768  
 SF 400.1300170 MHz  
 WDW no  
 SSB 0  
 LB 0 Hz  
 GB 0  
 PC 1.00

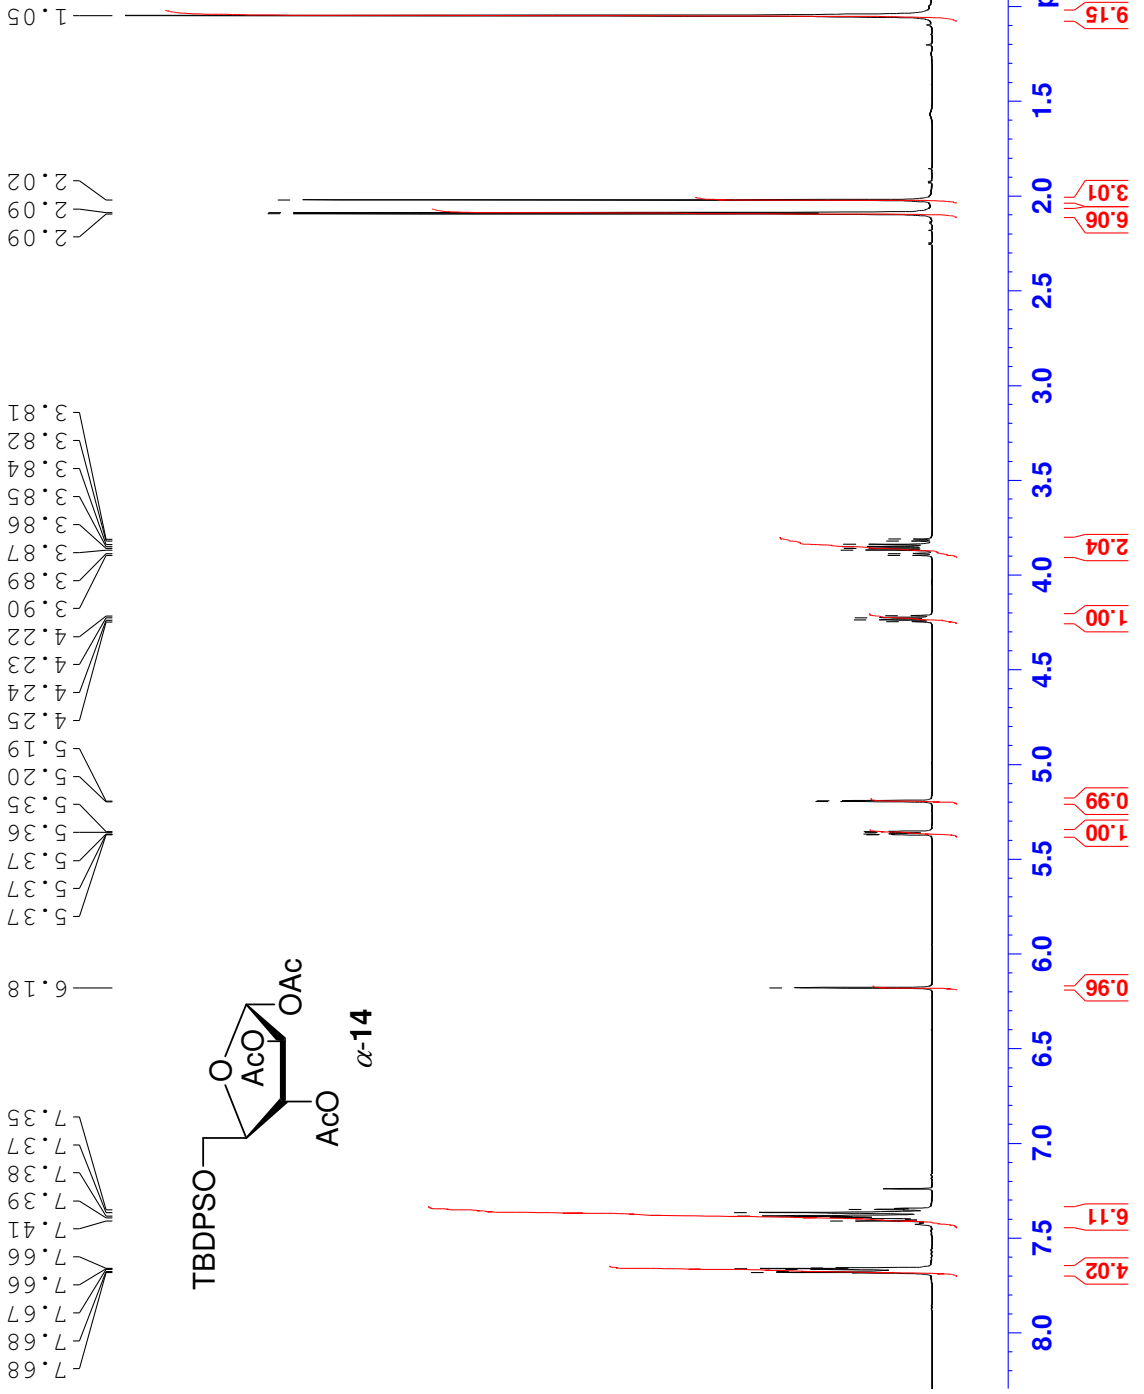

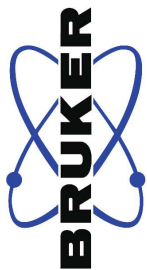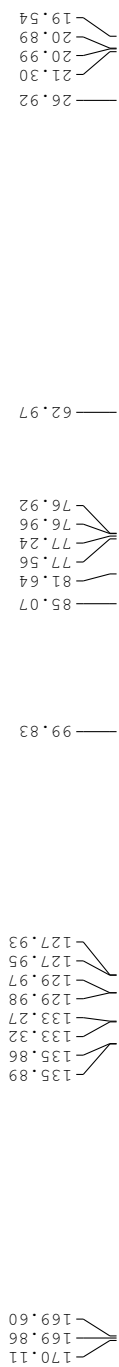

Current Data Parameters  
NAME AW585\_Kristalle  
EXPNO 21  
PROCNO 1

F2 - Acquisition Parameters  
Date\_ 20071126  
Time 12.44  
INSTRUM avance400  
PROBHD 5 mm BBO BB-IH  
PULPROG jmod  
TD 65536  
SOLVENT CDCl3  
NS 608  
DS 2  
SWH 25062.656 Hz  
FIDRES 0.382426 Hz  
AQ 1.3074932 sec  
RG 13004  
DW 19.950 usec  
DE 6.00 usec  
TE 300.2 K  
CNST2 145.000000  
CNST11 1.0000000  
D1 2.0000000 sec  
d20 0.00689655 sec  
DELTA 0.00001311 sec  
TD0 1

==== CHANNEL f1 =====  
NUC1 13C  
P1 10.30 usec  
P2 20.60 usec  
PL1 -1.00 dB  
SFO1 100.6233329 MHz

==== CHANNEL f2 =====  
CPDPRG2 waltz16  
NUC2 1H  
PCPD2 100.00 usec  
PL2 -3.00 dB  
PL12 16.00 dB  
SFO2 400.1316005 MHz

F2 - Processing parameters  
SI 32768  
SF 100.6127471 MHz  
WDW no  
SSB 0  
LB 0 Hz  
GB 0  
PC 1.40

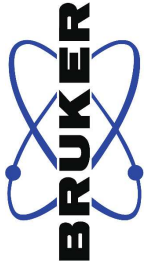

Current Data Parameters  
 NAME AW595  
 EXPNO 70  
 PROCNO 1

F2 - Acquisition Parameters  
 Date\_ 20041020  
 Time 16.21  
 INSTRUM avance400  
 PROBHD 5 mm PABBO BB-  
 PULPROG zg30  
 TD 65536  
 SOLVENT CDCl3  
 NS 16  
 DS 2  
 SWH 8278.146 Hz  
 FIDRES 0.126314 Hz  
 AQ 3.9584243 sec  
 RG 143.7  
 DM 60.400 usec  
 DE 6.00 usec  
 TE 300.0 K  
 D1 1.00000000 sec

==== CHANNEL f1 =====  
 NUC1 1H  
 P1 8.75 usec  
 PL1 -3.00 dB  
 SFO1 400.1324710 MHz

F2 - Processing parameters  
 SI 32768  
 SF 400.1300170 MHz  
 WDW no  
 SSB 0  
 LB 0 Hz  
 GB 0  
 PC 1.00

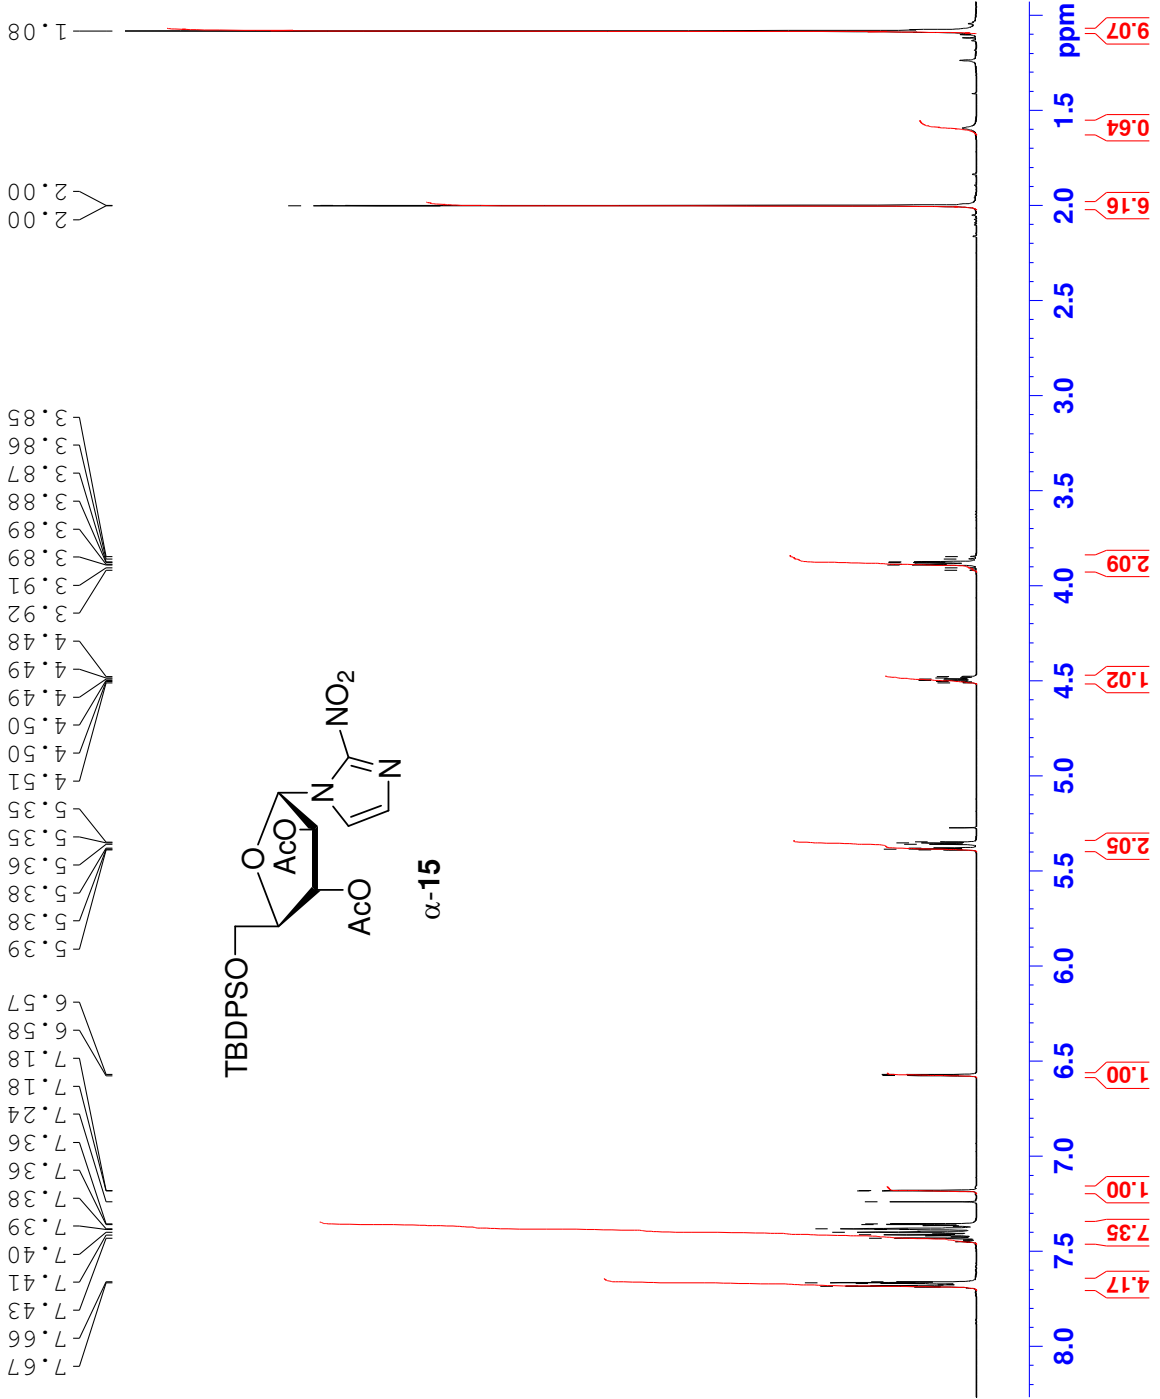

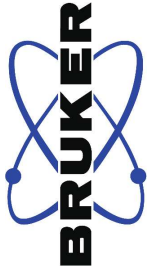

Current Data Parameters  
 NAME AW595  
 EXPNO 71  
 PROCNO 1

F2 - Acquisition Parameters  
 Date\_ 20041020  
 Time 17.29  
 INSTRUM advance400  
 PROBHD 5 mm PABBO BB-  
 PULPROG jmod  
 TD 65536  
 SOLVENT CDCl3  
 NS 1200  
 DS 2  
 SWH 25062.656 Hz  
 FIDRES 0.382426 Hz  
 AQ 1.3074932 sec  
 RG 14596.5  
 DW 19.950 usec  
 DE 6.00 usec  
 TE 300.0 K  
 CNST2 145.0000000  
 CNST11 1.0000000  
 D1 2.0000000 sec  
 d13 0.00000300 sec  
 d20 0.00689655 sec  
 DELTA 0.00001311 sec

==== CHANNEL f1 =====  
 NUC1 13C  
 P1 10.30 usec  
 P2 20.60 usec  
 PL1 -1.00 dB  
 SFO1 100.6232933 MHz

==== CHANNEL f2 =====  
 CPDPRG2 waltz16  
 NUC2 1H  
 PCPD2 100.00 usec  
 PL2 -3.00 dB  
 PL12 16.00 dB  
 SFO2 400.1316005 MHz

F2 - Processing parameters  
 SI 32768  
 SF 100.6127719 MHz  
 WDM no  
 SSB 0  
 LB 0 Hz  
 GB 0  
 PC 1.40

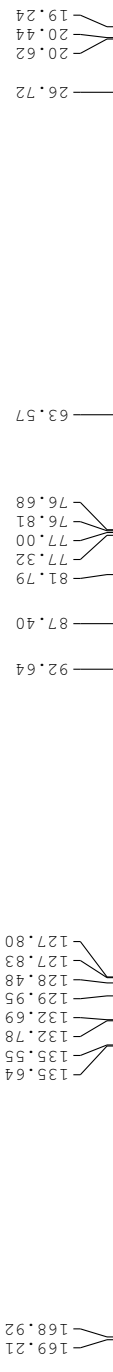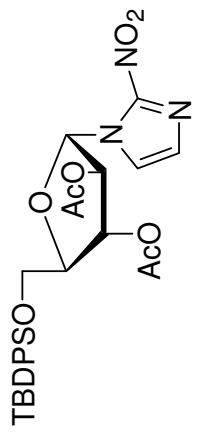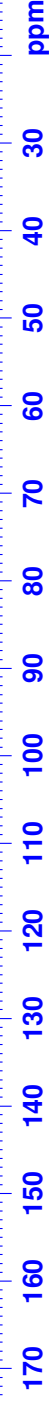

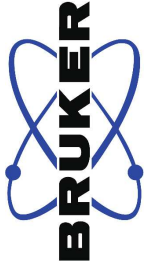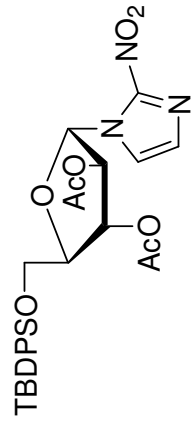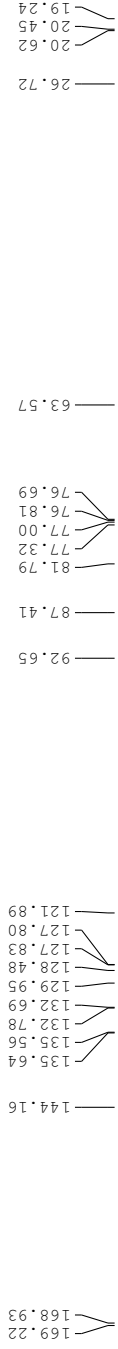

Current Data Parameters  
 NAME AW595  
 EXPNO 72  
 PROCNO 1

F2 - Acquisition Parameters  
 Date\_ 20041021  
 Time 9.02  
 INSTRUM avance400  
 PROBHD 5 mm PABBO BB-  
 PULPROG zgpg30  
 TD 65536  
 SOLVENT CDCl3  
 NS 1024  
 DS 4  
 SWH 23980.814 Hz  
 FIDRES 0.365918 Hz  
 AQ 1.3664756 sec  
 RG 7298.2  
 DW 20.850 usec  
 DE 6.00 usec  
 TE 300.0 K  
 D1 2.00000000 sec  
 d11 0.03000000 sec  
 d12 0.00002000 sec

==== CHANNEL f1 =====  
 NUC1 13C  
 P1 10.30 usec  
 PL1 -1.00 dB  
 SFO1 100.6228298 MHz

==== CHANNEL f2 =====  
 CPDPRG2 waltz16  
 NUC2 1H  
 PCPD2 100.00 usec  
 PL2 -3.00 dB  
 PL12 16.00 dB  
 PL13 20.00 dB  
 SFO2 400.1316005 MHz

F2 - Processing parameters  
 SI 32768  
 SF 100.6127719 MHz  
 WDW EM  
 SSB 0  
 LB 0.30 Hz  
 GB 0  
 PC 1.40

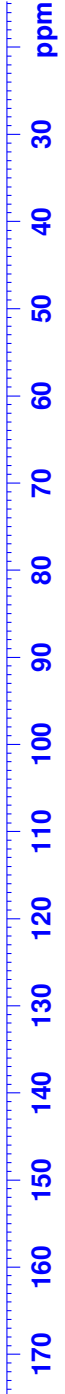

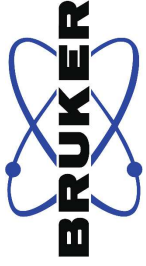

Current Data Parameters  
 NAME AW596\_W\_Alpha  
 EXPNO 100  
 PROCNO 1

F2 - Acquisition Parameters  
 Date\_ 20050413  
 Time\_ 15.12  
 INSTRUM avance400  
 PROBHD 5 mm BBO BB-1H  
 PULPROG zg30  
 TD 65536  
 SOLVENT CDCl3  
 NS 16  
 DS 2  
 SWH 8278.146 Hz  
 FIDRES 0.126314 Hz  
 AQ 3.9584243 sec  
 RG 114  
 DW 60.400 usec  
 DE 6.00 usec  
 TE 300.0 K  
 D1 1.00000000 sec

==== CHANNEL f1 =====  
 NUC1 1H  
 P1 8.75 usec  
 PL1 -3.00 dB  
 SFO1 400.1324710 MHz

F2 - Processing parameters  
 SI 32768  
 SF 400.1300172 MHz  
 WDW no  
 SSB 0  
 LB 0 Hz  
 GB 0  
 PC 1.00

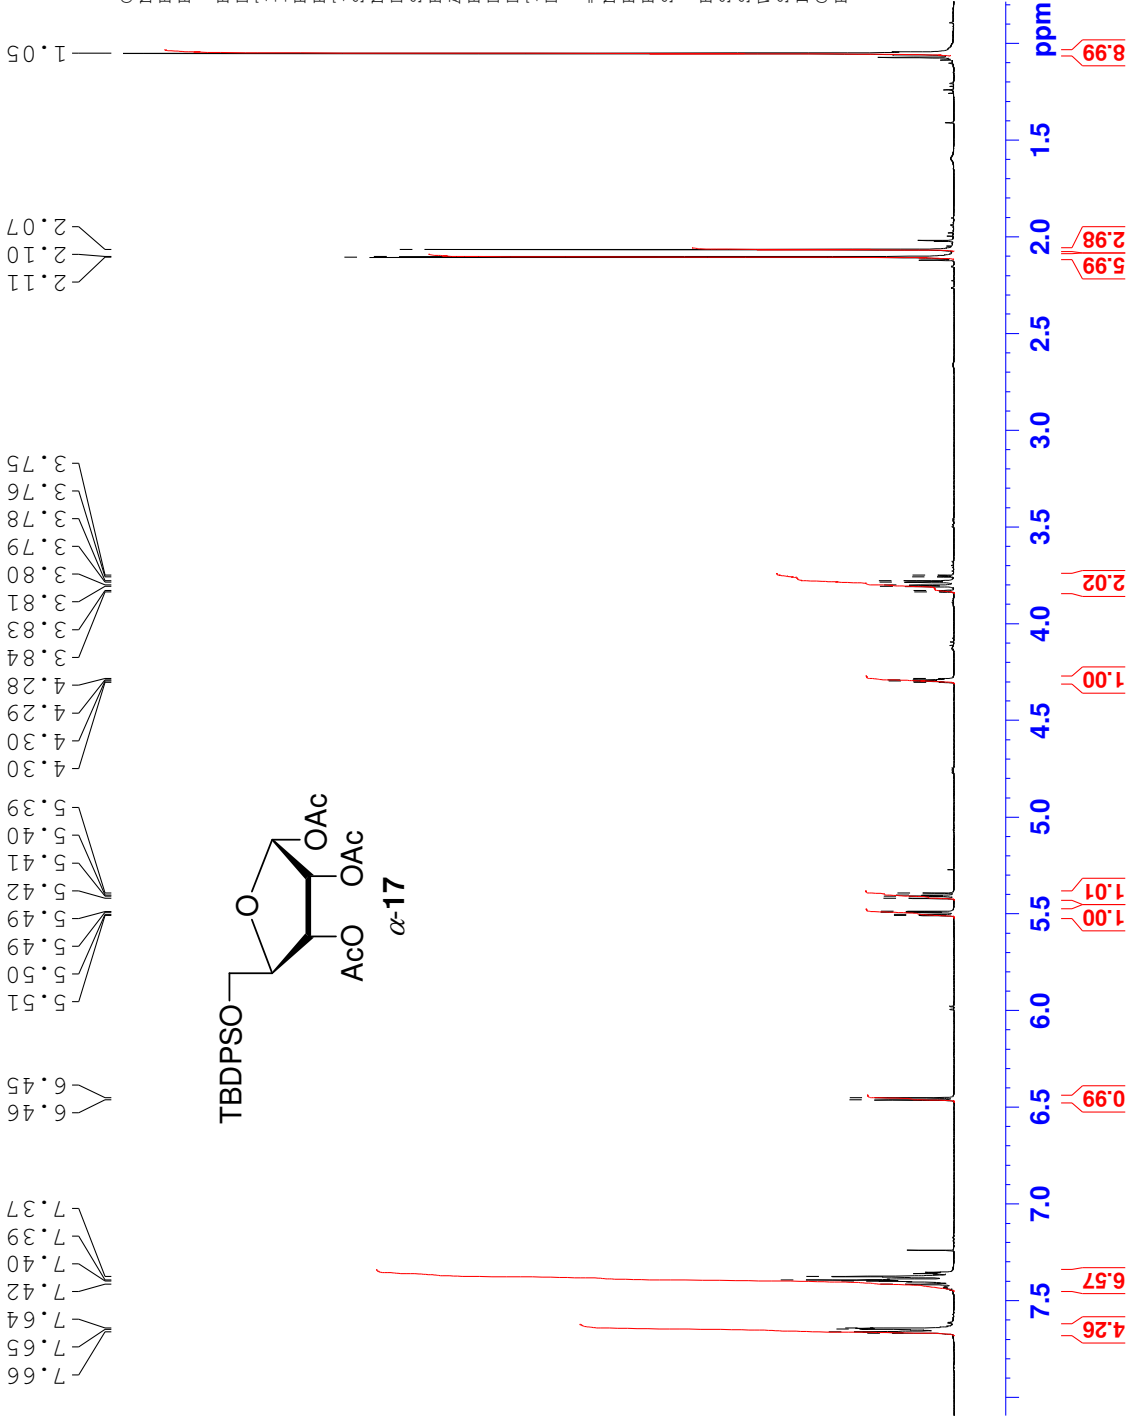

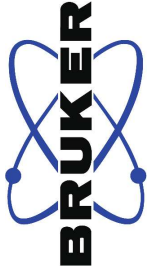

Current Data Parameters  
 NAME AWS96\_W\_Alpha  
 EXPNO 101  
 PROCNO 1

F2 - Acquisition Parameters  
 Date\_ 20050413  
 Time 16.09  
 INSTRUM avance400  
 PROBHD 5 mm BBO BB-1H  
 PULPROG jmod  
 TD 65536  
 SOLVENT CDCl3  
 NS 1000  
 DS 2  
 SWH 25062.656 Hz  
 FIDRES 0.382426 Hz  
 AQ 1.3074932 sec  
 RG 16384  
 DW 19.950 usec  
 DE 6.00 usec  
 TE 300.0 K  
 CNST2 145.0000000  
 CNST11 1.0000000  
 D1 2.0000000 sec  
 d13 0.00000300 sec  
 d20 0.00689655 sec  
 DELTA 0.00001311 sec

==== CHANNEL f1 =====  
 NUC1 13C  
 P1 10.30 usec  
 P2 20.60 usec  
 PL1 -1.00 dB  
 SFO1 100.6232933 MHz  
 ===== CHANNEL f2 =====  
 CPDPRG2 waltz16  
 NUC2 1H  
 PCPD2 100.00 usec  
 PL2 -3.00 dB  
 PL12 16.00 dB  
 SFO2 400.1316005 MHz  
 F2 - Processing parameters  
 SI 32768  
 SF 100.6127724 MHz  
 WDW no  
 SSB 0 Hz  
 LB 0  
 GB 0  
 PC 1.40

26.72  
21.09  
20.71  
20.31

94.48  
85.02  
77.32  
77.00  
76.68  
70.61  
70.45  
63.43

170.19  
169.90  
169.28  
135.61  
135.57  
132.77  
132.57  
129.86  
129.81  
127.81  
127.78

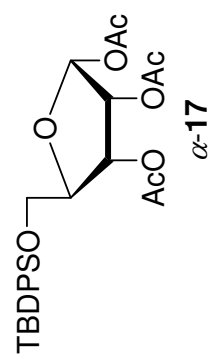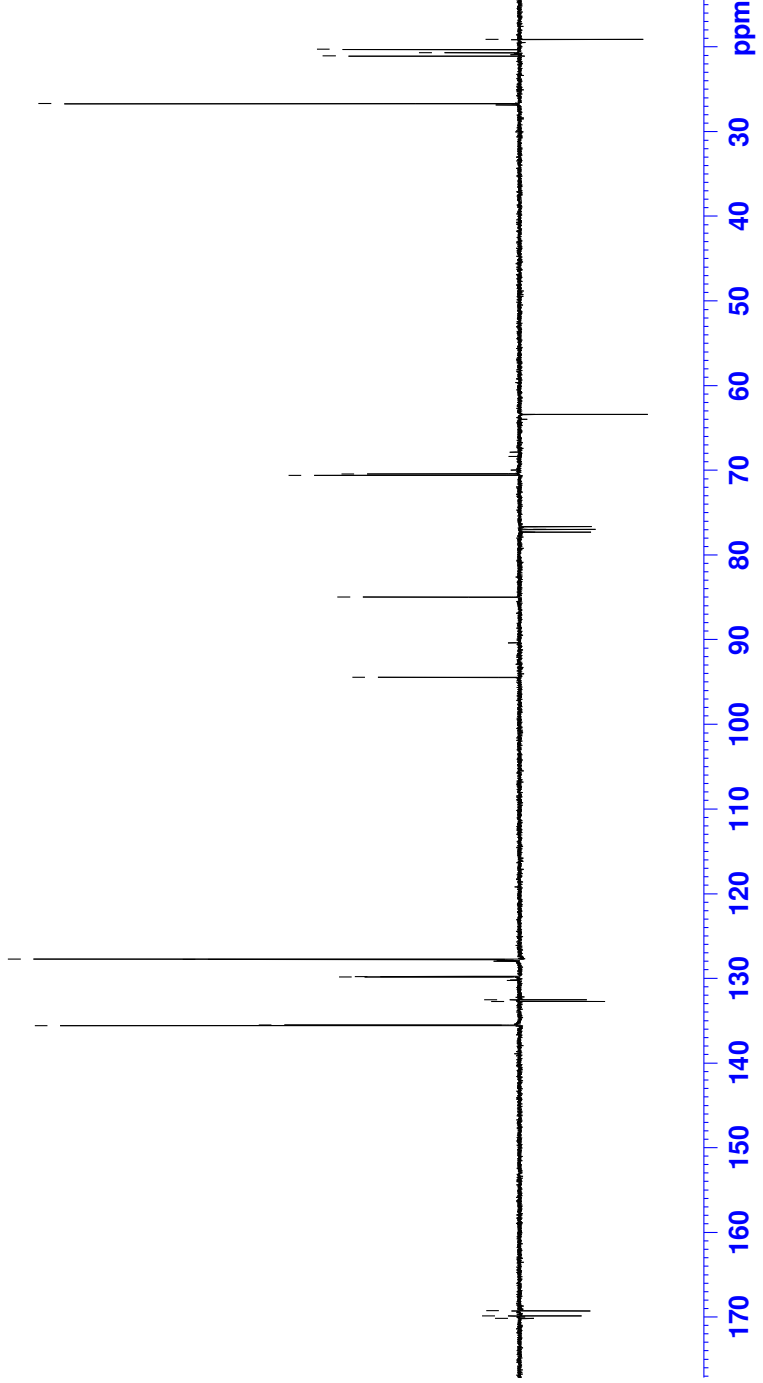



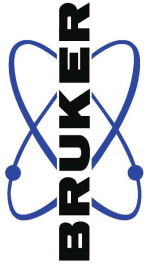

Current Data Parameters  
 NAME AW596\_W\_Beta  
 EXPNO 10  
 PROCNO 1

F2 - Acquisition Parameters  
 Date\_ 20050809  
 Time\_ 11:59  
 INSTRUM avance400  
 PROBHD 5 mm BBO BB-1H  
 PULPROG zg30  
 TD 65536  
 SOLVENT CDCl3  
 NS 16  
 DS 2  
 SWH 8278.146 Hz  
 FIDRES 0.126314 Hz  
 AQ 3.9584243 sec  
 RG 128  
 DW 60.400 usec  
 DE 6.00 usec  
 TE 300.2 K  
 D1 1.00000000 sec  
 TD0 1

==== CHANNEL f1 =====  
 NUC1 1H  
 P1 8.75 usec  
 PL1 -3.00 dB  
 SFO1 400.1324710 MHz

F2 - Processing parameters  
 SI 32768  
 SF 400.1300173 MHz  
 WDW EM  
 SSB 0  
 LB 0  
 GB 0  
 PC 1.00

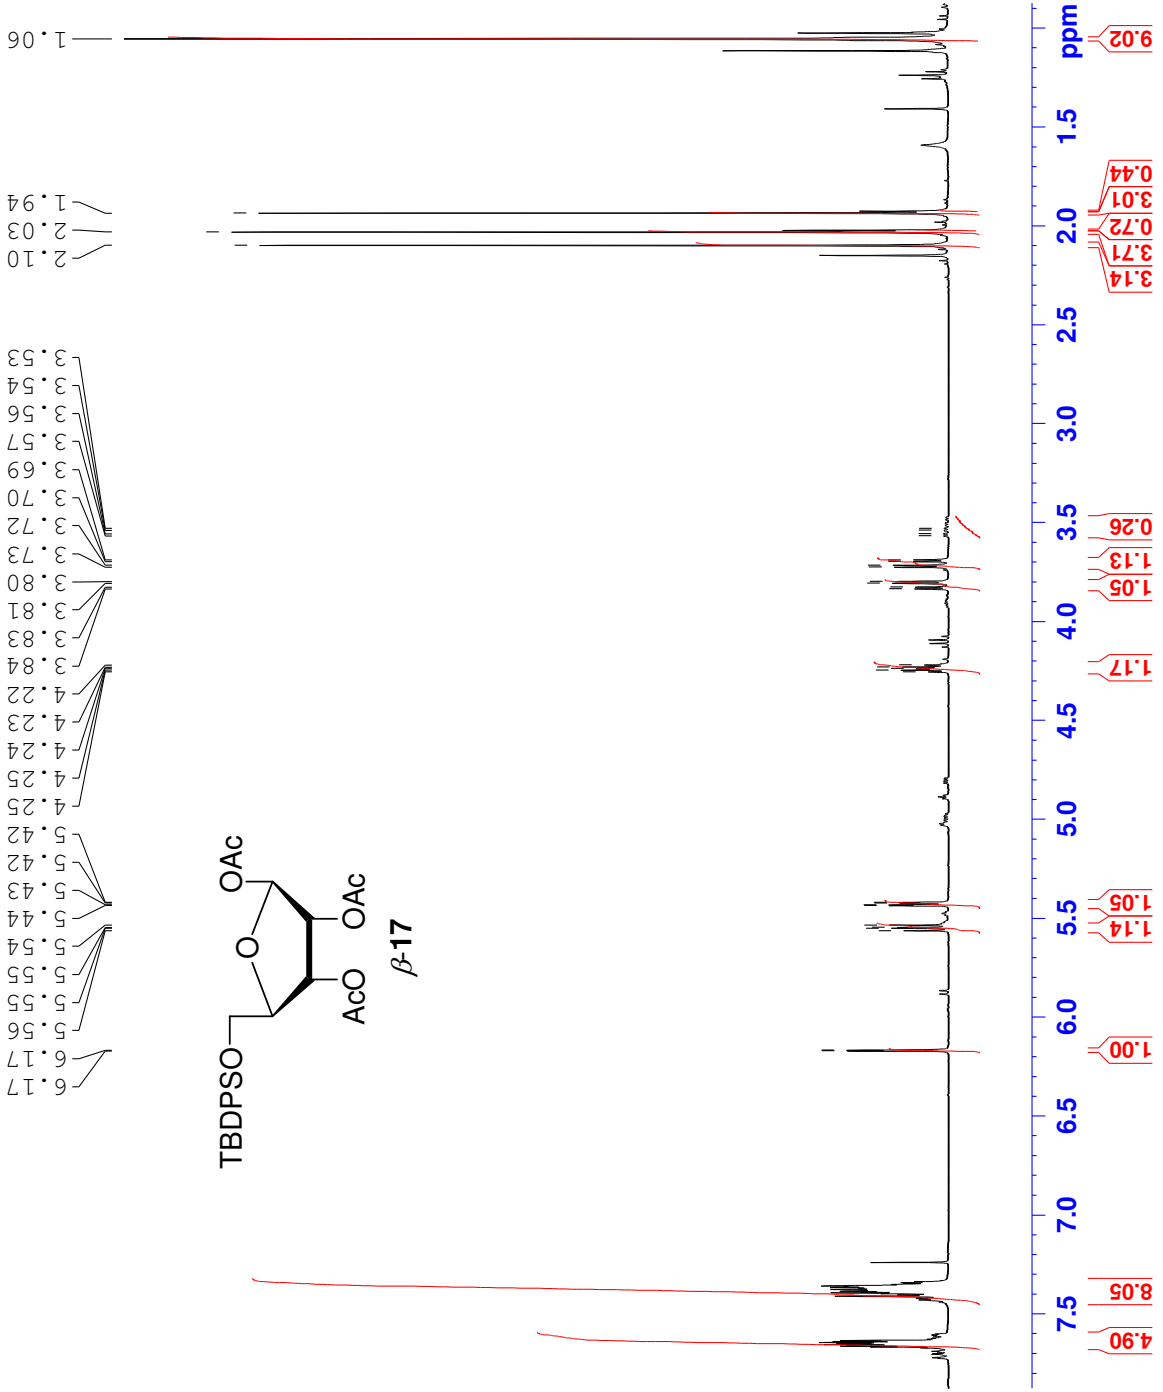



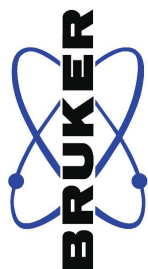

Current Data Parameters  
 NAME AW580\_W\_Alpha  
 EXPNO 80  
 PROCNO 1

F2 - Acquisition Parameters  
 Date\_ 20040915  
 Time 15.51  
 INSTRUM avance400  
 PROBHD 5 mm PABBO BB-  
 PULPROG zg30  
 TD 65536  
 SOLVENT CDCl3  
 NS 16  
 DS 2  
 SWH 8278.146 Hz  
 FIDRES 0.126314 Hz  
 AQ 3.9584243 sec  
 RG 64  
 DW 60.400 usec  
 DE 6.00 usec  
 TE 300.0 K  
 D1 1.00000000 sec

==== CHANNEL f1 =====  
 NUC1 1H  
 P1 8.75 usec  
 PL1 -3.00 dB  
 SFO1 400.1324710 MHz

F2 - Processing parameters  
 SI 32768  
 SF 400.1300168 MHz  
 WDW no  
 SSB 0 Hz  
 LB 0  
 GB 0  
 PC 1.00

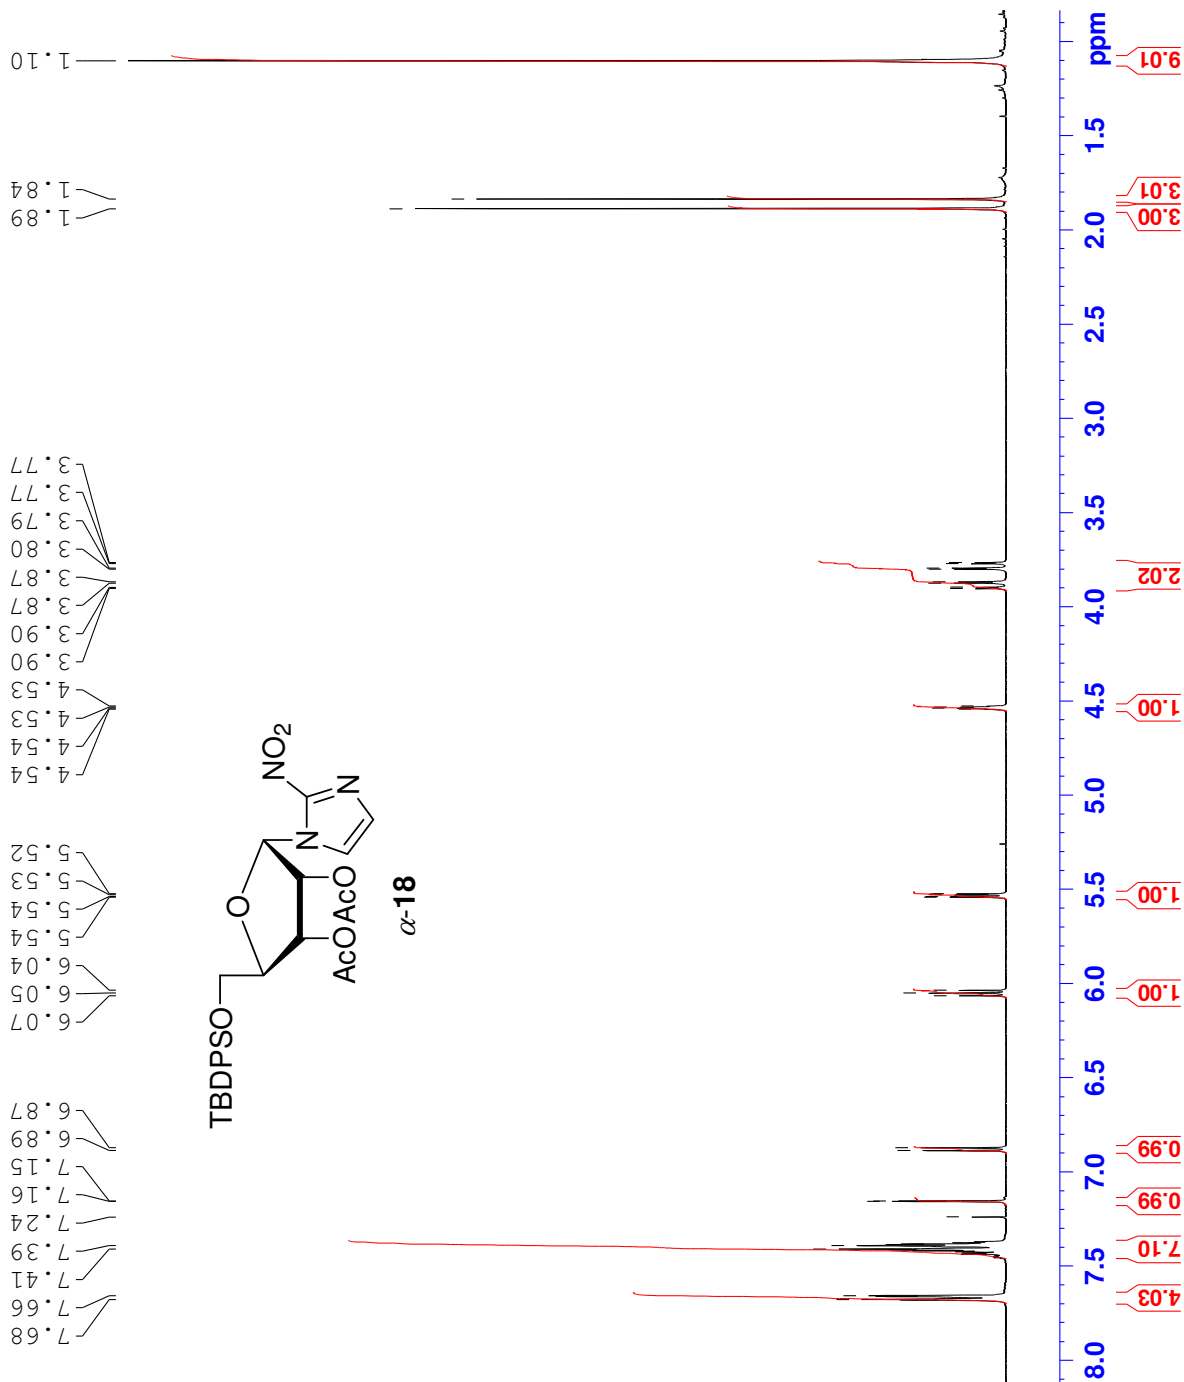

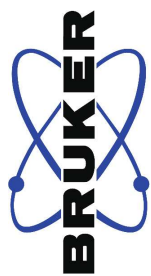

Current Data Parameters  
NAME AW580\_W\_Alpha  
EXPNO 81  
PROCNO 1

F2 - Acquisition Parameters  
Date\_ 20040915  
Time 16.00  
INSTRUM avance400  
PROBHD 5 mm PABBO BB-  
PULPROG jmod  
TD 65536  
SOLVENT CDCl3  
NS 129  
DS 2  
SWH 25062.656 Hz  
FIDRES 0.382426 Hz  
AQ 1.3074932 sec  
RG 10321.3  
DW 19.950 usec  
DE 6.00 usec  
TE 300.0 K  
CNST2 145.0000000  
CNST11 1.0000000  
D1 2.0000000 sec  
d13 0.0000300 sec  
d20 0.00689655 sec  
DELTA 0.00001311 sec

==== CHANNEL f1 =====  
NUC1 13C  
P1 10.30 usec  
P2 20.60 usec  
PL1 -1.00 dB  
SFO1 100.6232933 MHz

==== CHANNEL f2 =====  
CPDPRG2 waltz16  
NUC2 1H  
PCPD2 100.00 usec  
PL2 -3.00 dB  
PL12 16.00 dB  
SFO2 400.1316005 MHz

F2 - Processing parameters  
SI 32768  
SF 100.6127769 MHz  
WDW no  
SSB 0  
LB 0 Hz  
GB 0  
PC 1.40

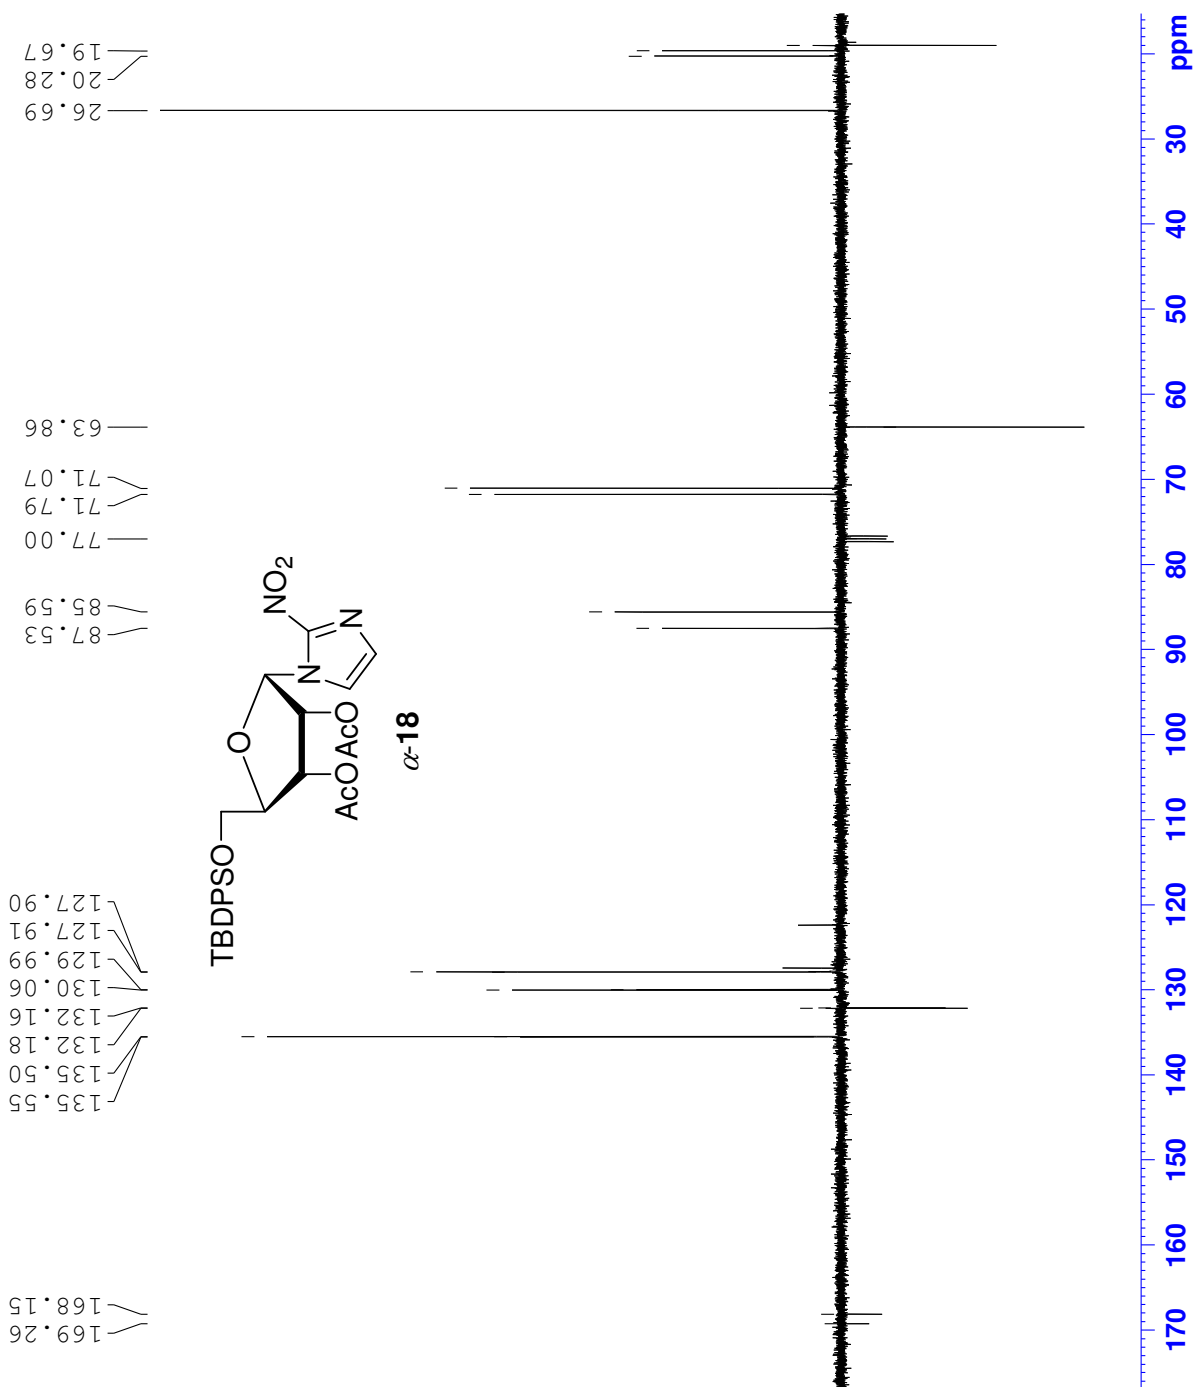

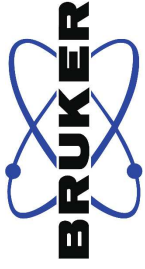

Current Data Parameters  
 NAME AW580\_W\_Alpha  
 EXPNO 82  
 PROCNO 1

F2 - Acquisition Parameters  
 Date\_ 20040915  
 Time 16.55  
 INSTRUM advance400  
 PROBHD 5 mm PABBO BB-  
 PULPROG zgpg30  
 TD 65536  
 SOLVENT CDCl3  
 NS 800  
 DS 4  
 SWH 23980.814 Hz  
 FIDRES 0.365918 Hz  
 AQ 1.3664756 sec  
 RG 4096  
 DW 20.850 usec  
 DE 6.00 usec  
 TE 300.0 K  
 D1 2.00000000 sec  
 d11 0.03000000 sec  
 d12 0.00002000 sec

==== CHANNEL f1 =====  
 NUC1 13C  
 P1 10.30 usec  
 PL1 -1.00 dB  
 SFO1 100.6228298 MHz

==== CHANNEL f2 =====  
 CPDPRG2 waltz16  
 NUC2 1H  
 PCPD2 100.00 usec  
 PL2 -3.00 dB  
 PL12 16.00 dB  
 PL13 20.00 dB  
 SFO2 400.1316005 MHz

F2 - Processing parameters  
 SI 32768  
 SF 100.6127769 MHz  
 WDW EM  
 SSB 0  
 GB 0  
 PC 1.40

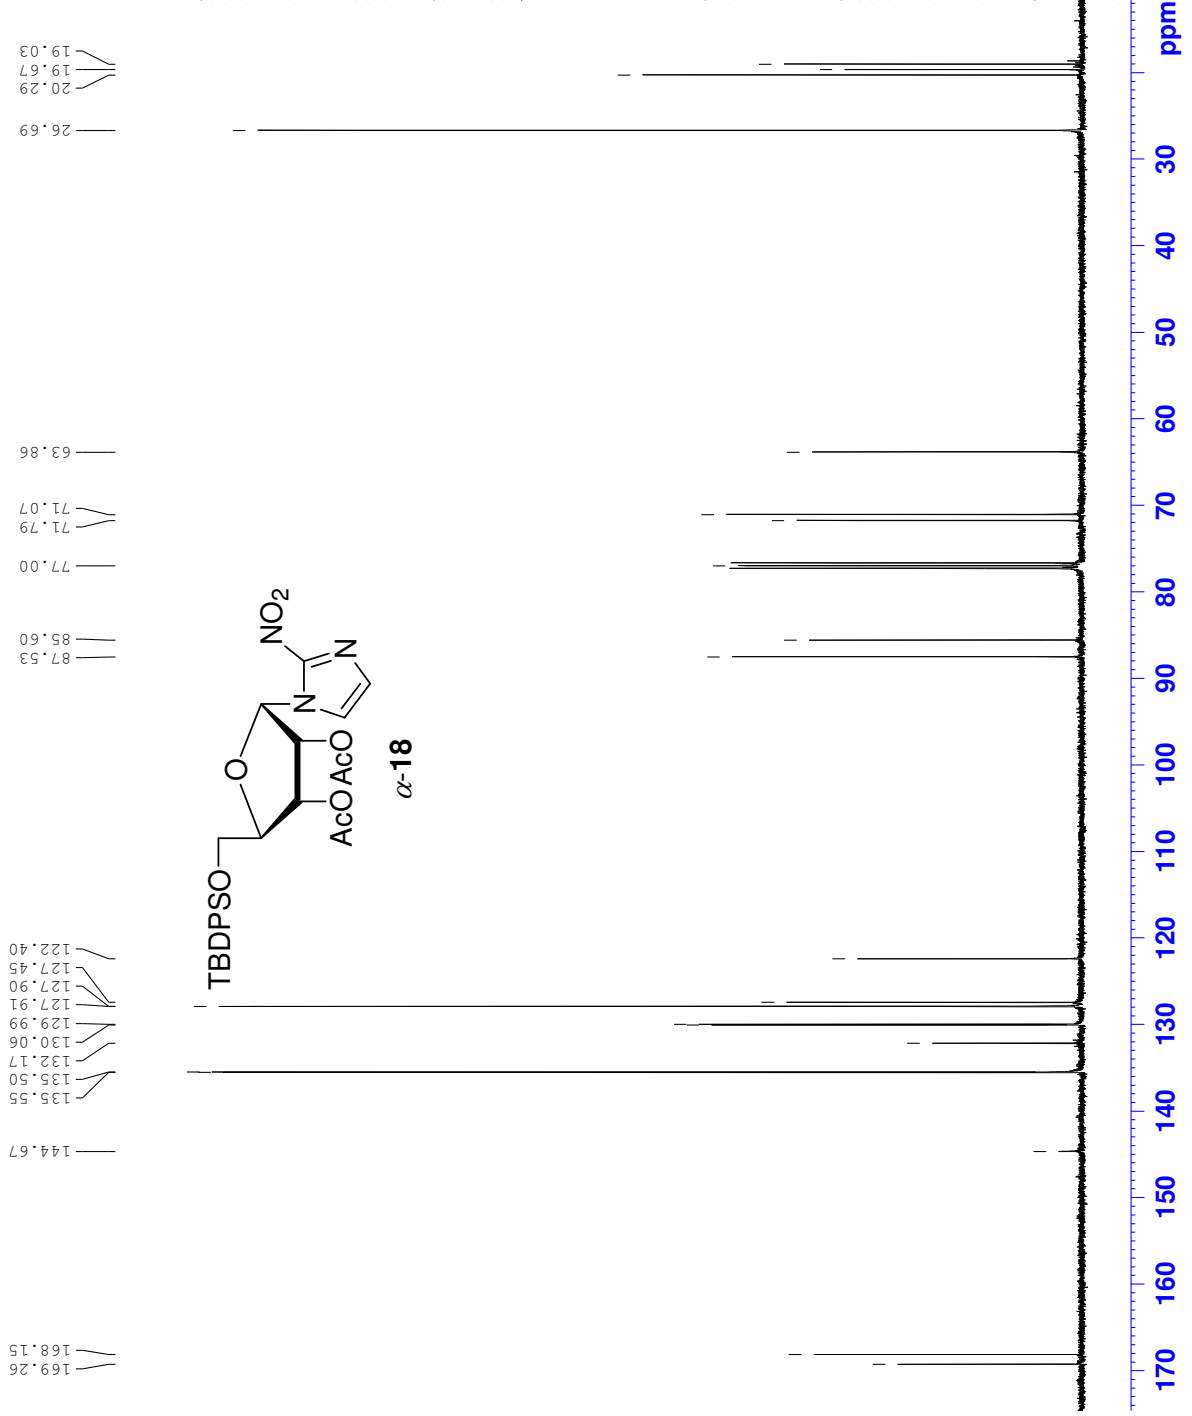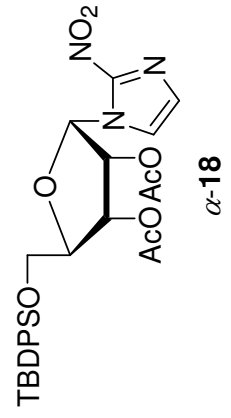

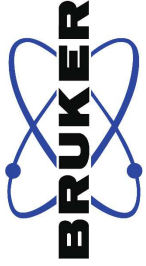

Current Data Parameters  
 NAME AW597\_W\_Beta  
 EXPNO 30  
 PROCNO 1

F2 - Acquisition Parameters  
 Date\_ 20041116  
 Time 9.41  
 INSTRUM advance400  
 PROBHD 5 mm Multinucl  
 PULPROG zg30  
 TD 65536  
 SOLVENT CDCl3  
 NS 16  
 DS 2  
 SWH 8278.146 Hz  
 FIDRES 0.126314 Hz  
 AQ 3.9584243 sec  
 RG 101.6  
 DW 60.400 usec  
 DE 6.00 usec  
 TE 300.0 K  
 D1 1.0000000 sec

==== CHANNEL f1 =====  
 NUC1 1H  
 P1 9.80 usec  
 PL1 3.00 dB  
 SFO1 400.1324710 MHz

F2 - Processing parameters  
 SI 32768  
 SF 400.1300167 MHz  
 WDW no  
 SSB 0  
 LB 0 Hz  
 GB 0  
 PC 1.00

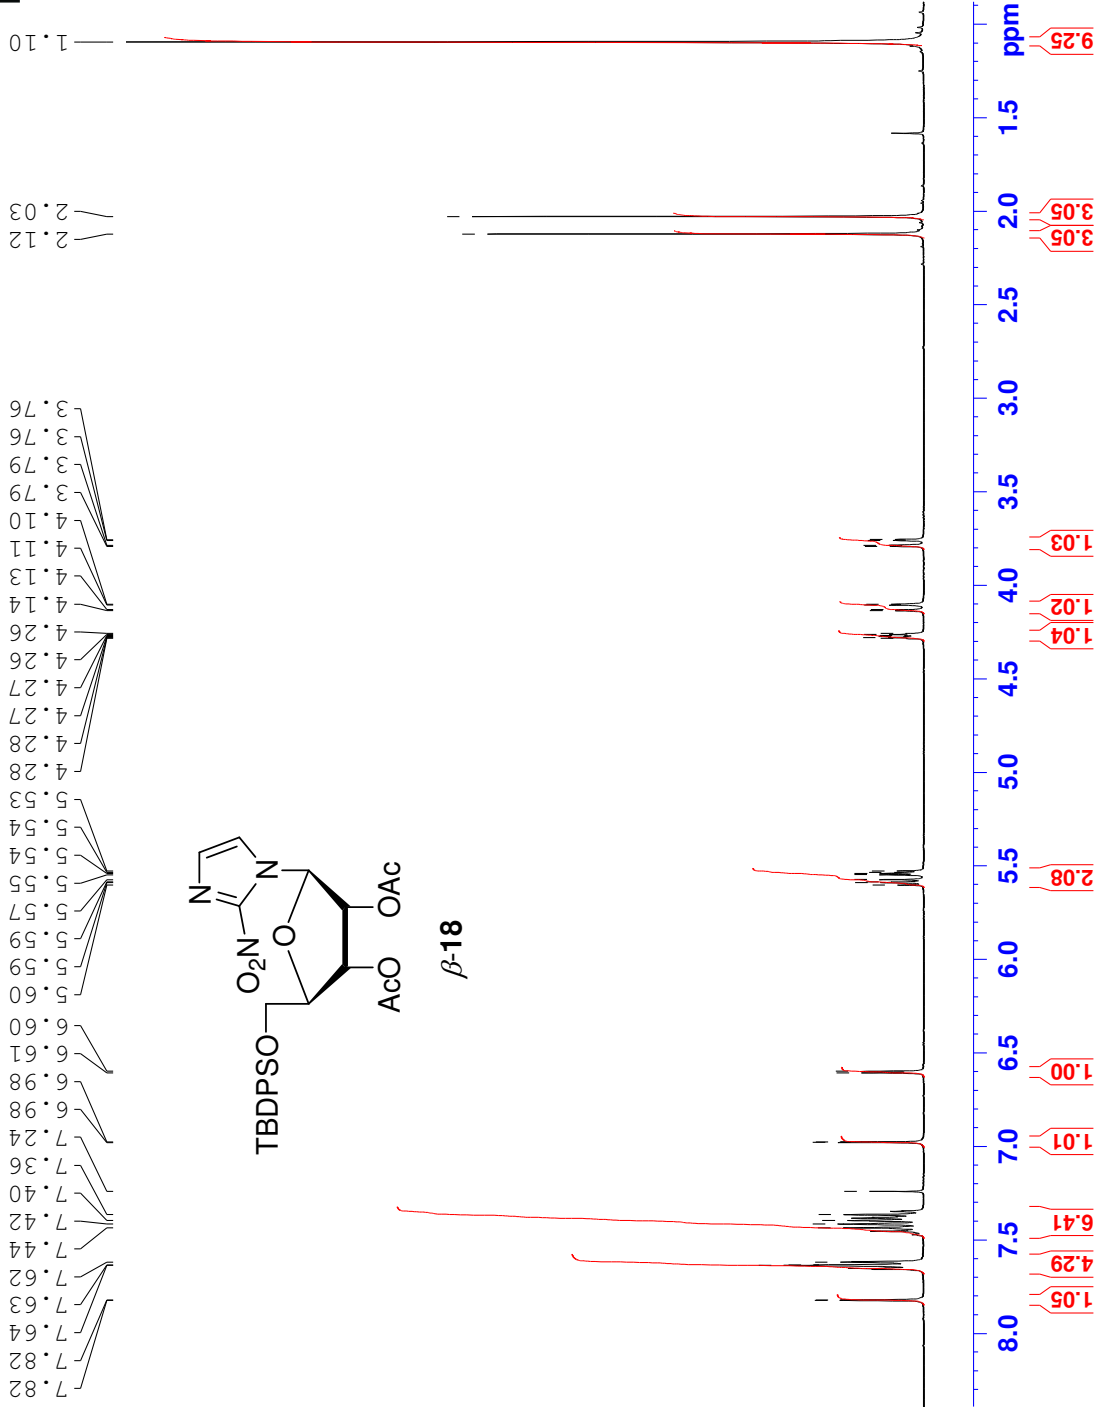

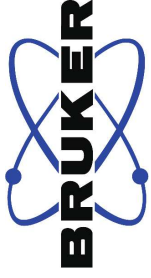

Current Data Parameters  
 NAME AW597\_W\_Beta  
 EXPNO 32  
 PROCNO 1

F2 - Acquisition Parameters  
 Date\_ 20041116  
 Time 11.49  
 INSTRUM advance400  
 PROBHD 5 mm Multinucl  
 PULPROG jmod  
 TD 65536  
 SOLVENT CDCl3  
 NS 1020  
 DS 2  
 SWH 25062.656 Hz  
 FIDRES 0.382426 Hz  
 AQ 1.3074932 sec  
 RG 10321.3  
 DW 19.950 usec  
 DE 6.00 usec  
 TE 300.0 K  
 CNST2 145.0000000  
 CNST11 1.0000000  
 D1 2.00000000 sec  
 d13 0.00000300 sec  
 d20 0.00689655 sec  
 DELTA 0.00001401 sec

==== CHANNEL f1 =====  
 NUC1 13C  
 P1 11.00 usec  
 P2 22.00 usec  
 PL1 -6.00 dB  
 SF01 100.6232933 MHz  
 ===== CHANNEL f2 =====  
 CPDPRG2 waltz16  
 NUC2 1H  
 PCPD2 100.00 usec  
 PL2 3.00 dB  
 PL12 22.00 dB  
 SF02 400.1316005 MHz  
 F2 - Processing parameters  
 SI 32768  
 SF 100.6127714 MHz  
 WDW no  
 SSB 0  
 LB 0 Hz  
 GB 0  
 PC 1.40

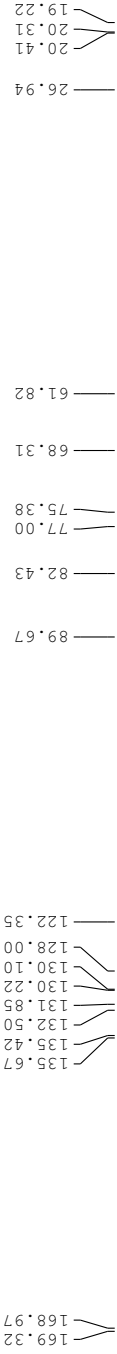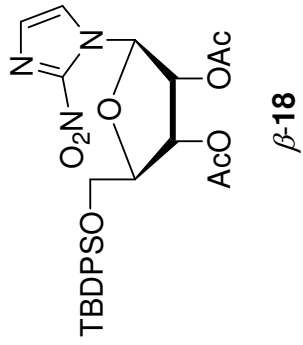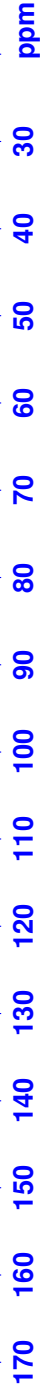

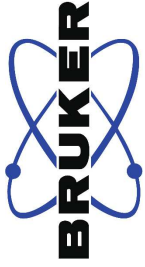

Current Data Parameters  
 NAME AW597\_W\_Beta  
 EXPNO 31  
 PROCNO 1

F2 - Acquisition Parameters  
 Date\_ 20041116  
 Time 10.52  
 INSTRUM advance400  
 PROBHD 5 mm Multinucl  
 PULPROG zgpg30  
 TD 65536  
 SOLVENT CDCl3  
 NS 1200  
 DS 4  
 SWH 23980.814 Hz  
 FIDRES 0.365918 Hz  
 AQ 1.3664756 sec  
 RG 3251  
 DW 20.850 usec  
 DE 6.00 usec  
 TE 300.0 K  
 D1 2.00000000 sec  
 d11 0.03000000 sec  
 d12 0.00002000 sec

==== CHANNEL f1 =====  
 NUC1 13C  
 P1 11.00 usec  
 PL1 -6.00 dB  
 SFO1 100.6228298 MHz

==== CHANNEL f2 =====  
 CPDPRG2 waltz16  
 NUC2 1H  
 P2 100.00 usec  
 PL2 3.00 dB  
 PL12 22.00 dB  
 PL13 24.00 dB  
 SFO2 400.1316005 MHz

F2 - Processing parameters  
 SI 32768  
 SF 100.6127719 MHz  
 WDW EM  
 SSB 0  
 LB 0 0.30 Hz  
 GB 0  
 PC 1.40

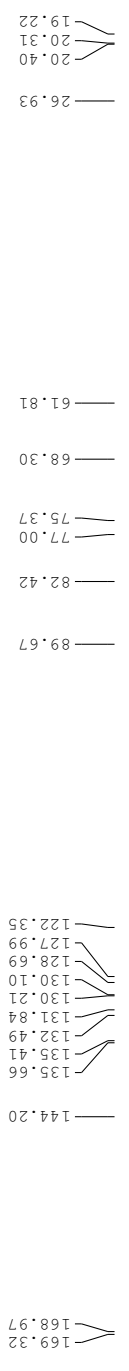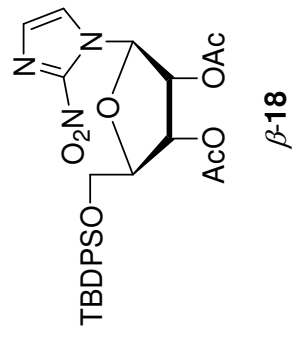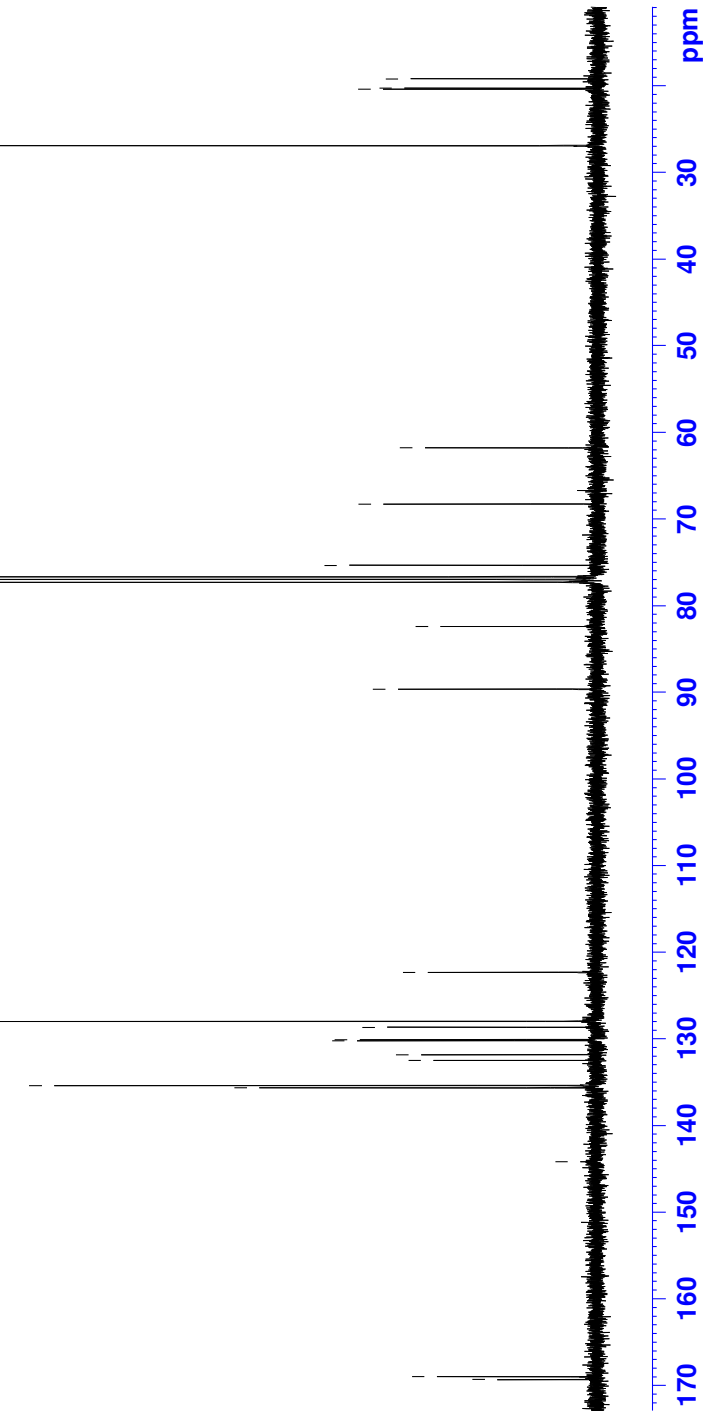



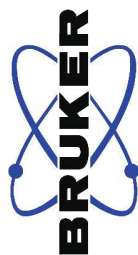

Current Data Parameters  
NAME AW574  
EXPNO 90  
PROCNO 1

F2 - Acquisition Parameters  
Date\_ 20040812  
Time 22.27  
INSTRUM avance400  
PROBHD 5 mm FAPBO BB-  
PULPROG zg30  
TD 65536  
SOLVENT CDCl3  
NS 16  
DS 2  
SWH 8278.146 Hz  
FIDRES 0.126314 Hz  
AQ 3.9584243 sec  
RG 256  
DW 60.400 usec  
DE 6.00 usec  
TE 300.0 K  
D1 1.00000000 sec

==== CHANNEL f1 =====  
NUC1 1H  
P1 8.75 usec  
PL1 -3.00 dB  
SFO1 400.1324710 MHz

F2 - Processing parameters  
SI 32768  
SF 400.1300171 MHz  
WDW no  
SSB 0 Hz  
LB 0 Hz  
GB 0  
PC 1.00

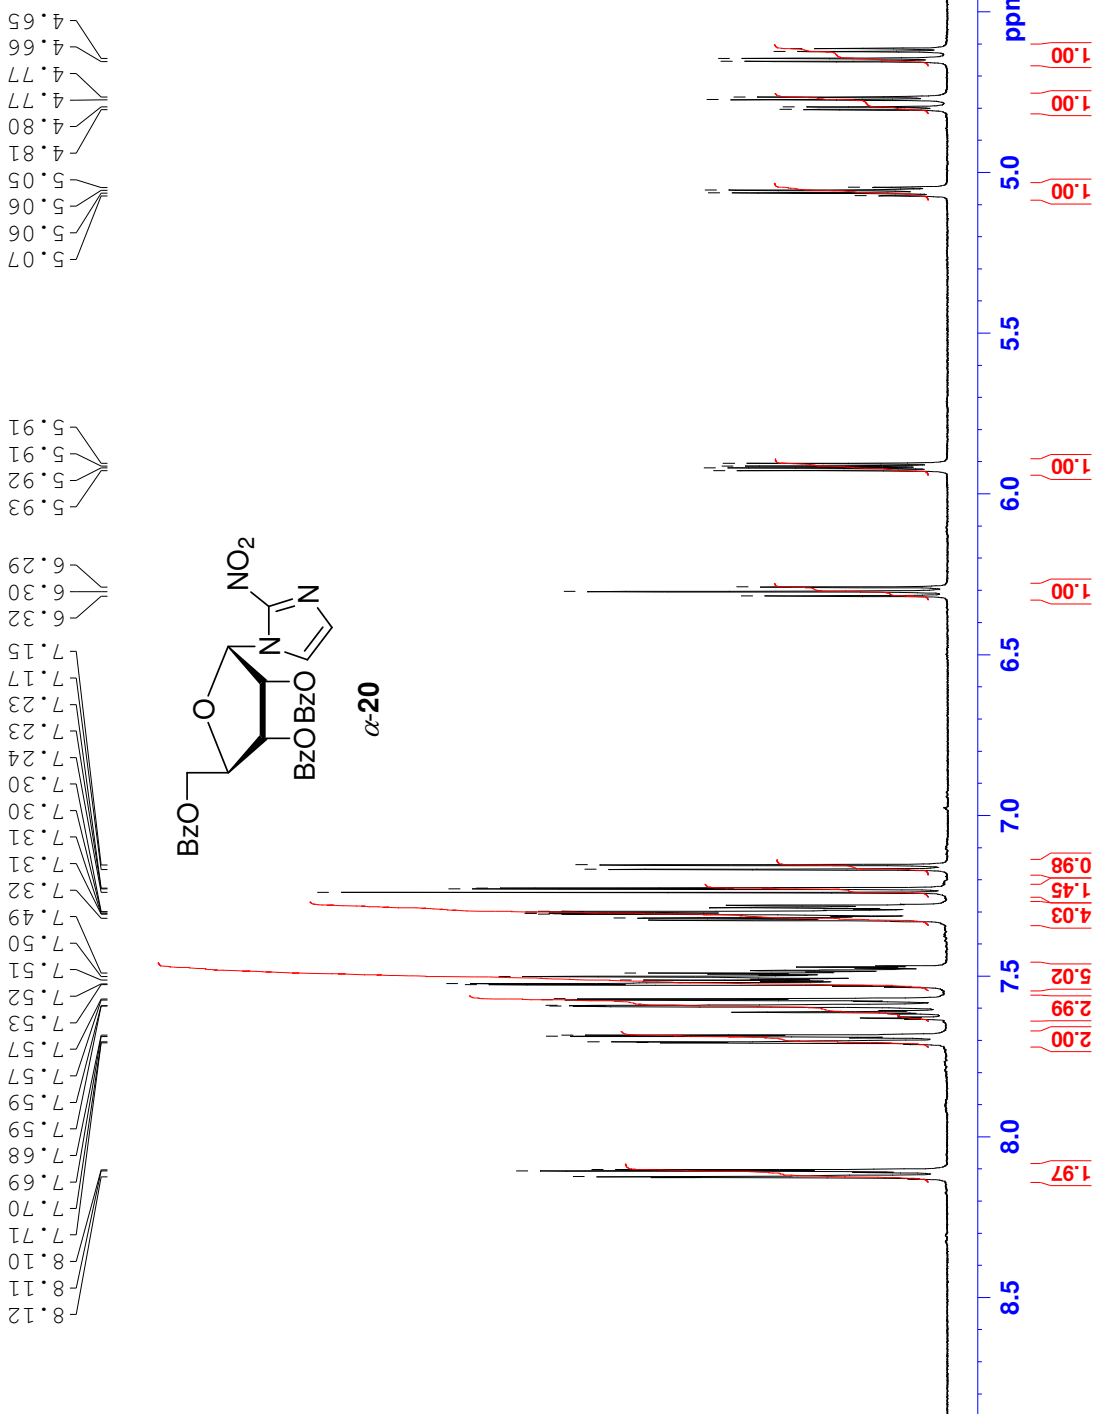

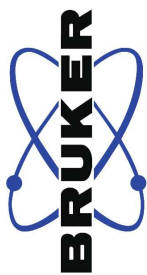

Current Data Parameters  
NAME AW574  
EXPNO 91  
PROCNO 1

F2 - Acquisition Parameters  
Date\_ 20040812  
Time 23.13  
INSTRUM avance400  
PROBHD 5 mm PABBO BB-  
PULPROG jmod  
TD 65536  
SOLVENT CDCl3  
NS 800  
DS 2  
SWH 25062.656 Hz  
FIDRES 0.382426 Hz  
AQ 1.3074932 sec  
RG 13004  
DW 19.950 usec  
DE 6.00 usec  
TE 300.0 K  
CNST2 145.0000000  
CNST11 1.0000000  
d1 2.00000000 sec  
d13 0.00000300 sec  
d20 0.00689655 sec  
DELTA 0.00001311 sec

==== CHANNEL f1 =====  
NUC1 13C  
P1 10.30 usec  
P2 20.60 usec  
PL1 -1.00 dB  
SFO1 100.6232933 MHz  
  
==== CHANNEL f2 =====  
CPDPRG2 waltz16  
NUC2 1H  
PCPD2 100.00 usec  
PL2 -3.00 dB  
PL12 16.00 dB  
SFO2 400.1316005 MHz  
  
F2 - Processing parameters  
SI 32768  
SF 100.6127704 MHz  
WDW no  
SSB 0  
LB 0 Hz  
GB 0  
PC 1.40

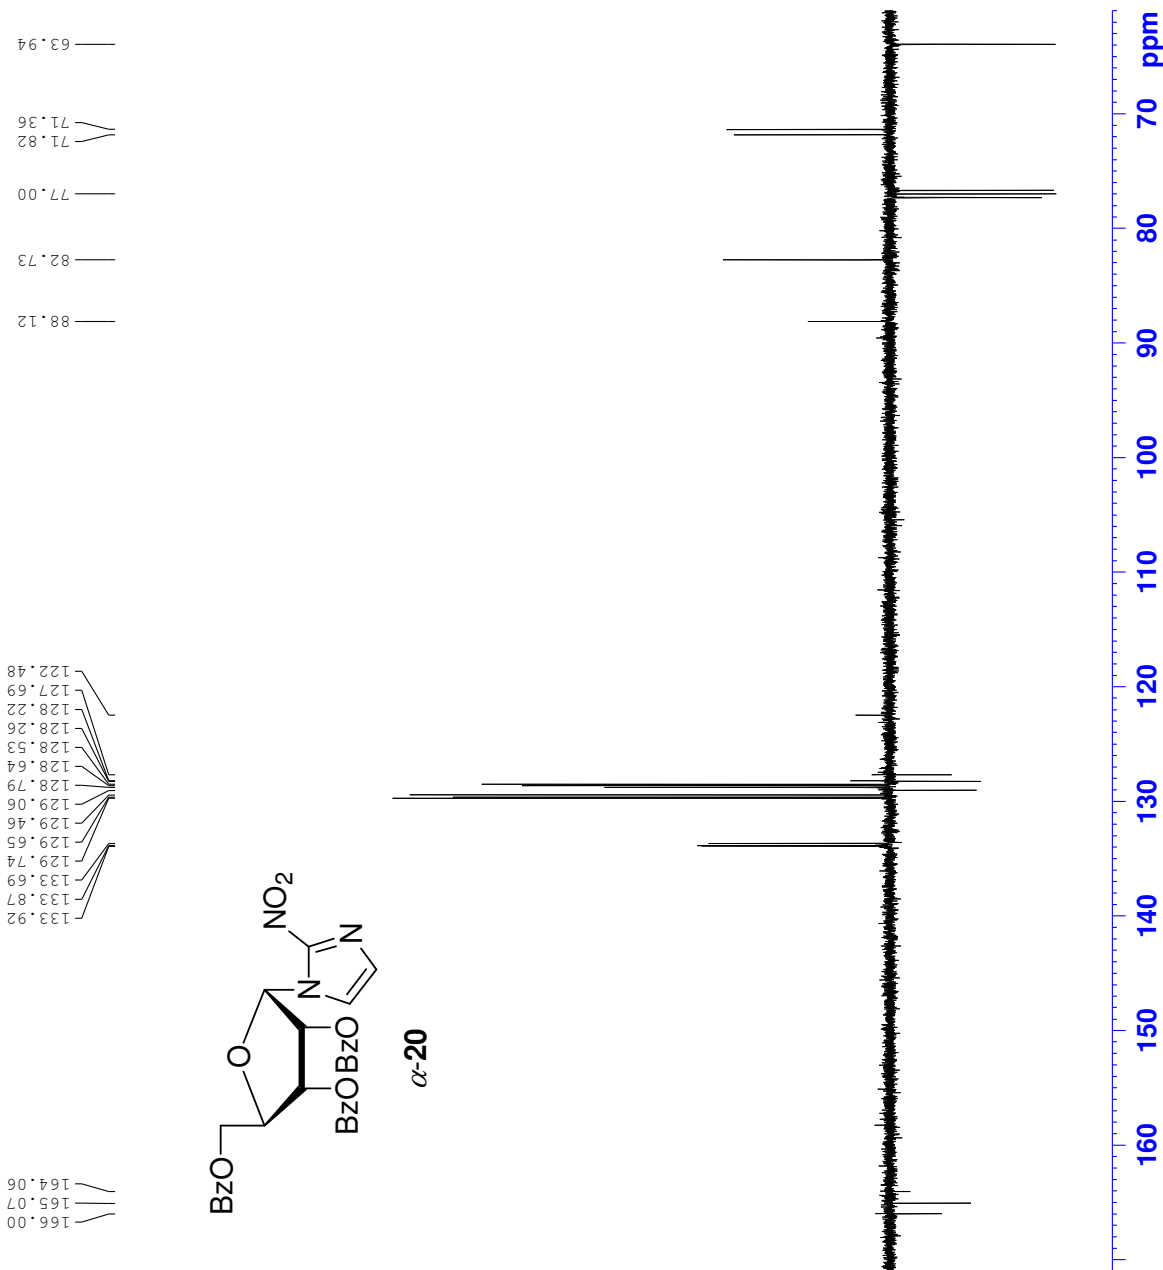

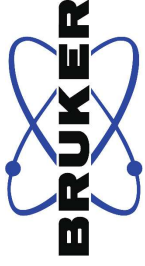

Current Data Parameters  
 NAME AW574  
 EXPNO 41  
 PROCNO 1

F2 - Acquisition Parameters  
 Date\_ 20040817  
 Time 9.41  
 INSTRUM avance400  
 PROBHD 5 mm FAPBO BB-  
 PULPROG zgpg30  
 TD 65536  
 SOLVENT CDCl3  
 NS 800  
 DS 4  
 SWH 23980.814 Hz  
 FIDRES 0.365918 Hz  
 AQ 1.3664756 sec  
 RG 3251  
 DW 20.850 usec  
 DE 6.00 usec  
 TE 300.0 K  
 D1 2.0000000 sec  
 d11 0.03000000 sec  
 d12 0.00002000 sec

==== CHANNEL f1 =====  
 NUC1 13C  
 P1 10.30 usec  
 PL1 -1.00 dB  
 SFO1 100.6228298 MHz

==== CHANNEL f2 =====  
 CPDPRG2 waltz16  
 NUC2 1H  
 PCPD2 100.00 usec  
 PL2 -3.00 dB  
 PL12 16.00 dB  
 PL13 20.00 dB  
 SFO2 400.1316005 MHz

F2 - Processing parameters  
 SI 32768  
 SF 100.6127741 MHz  
 WDW EM  
 SSB 0  
 LB 0  
 GB 0  
 PC 1.40

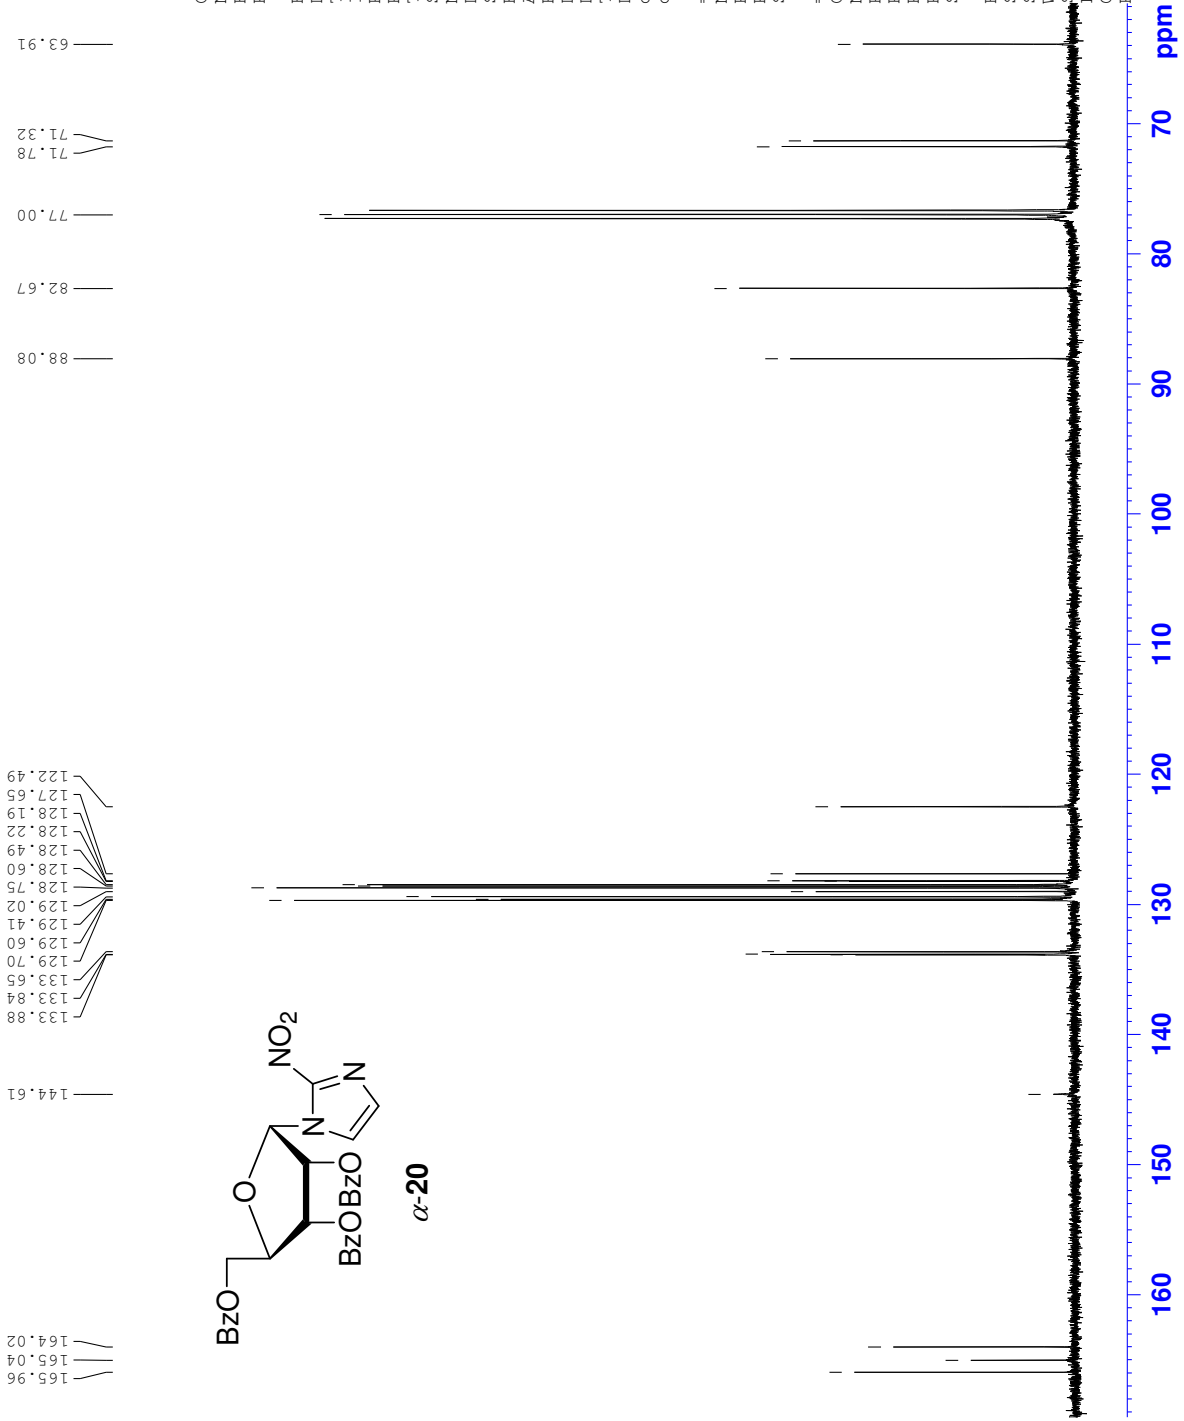

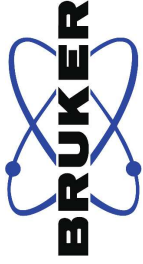

4.89  
4.88  
4.86  
4.85  
4.84  
4.83  
4.83  
4.82  
4.81  
4.72  
4.72

5.88  
5.86  
5.85  
5.83  
5.82  
5.82  
5.81

8.07  
8.06  
7.98  
7.96  
7.96  
7.96  
7.90  
7.88  
7.88  
7.57  
7.57  
7.49  
7.47  
7.41  
7.37  
7.35  
7.24  
7.12  
7.11  
6.97  
6.96

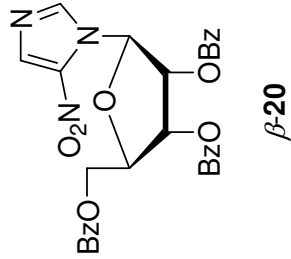

Current Data Parameters  
 NAME AW718  
 EXPNO 10  
 PROCNO 1  
 F2 - Acquisition Parameters  
 Date\_ 20080924  
 Time\_ 10.57  
 INSTRUM advance400  
 PROBHD 5 mm BBO BB-IH  
 PULPROG zg30  
 TD 65536  
 SOLVENT CDC13  
 NS 16  
 DS 2  
 SWH 8278.146 Hz  
 FIDRES 0.126314 Hz  
 AQ 3.9584243 sec  
 RG 287.4  
 DW 60.400 usec  
 DE 6.00 usec  
 TE 300.2 K  
 D1 1.00000000 sec  
 TD0 1  
 ===== CHANNEL f1 =====  
 NUC1 1H  
 P1 8.75 usec  
 PL1 -3.00 dB  
 SF01 400.1324710 MHz  
 F2 - Processing parameters  
 SI 32768  
 SF 400.1300173 MHz  
 WDW no  
 SSB 0  
 LB 0 Hz  
 GB 0  
 PC 1.00

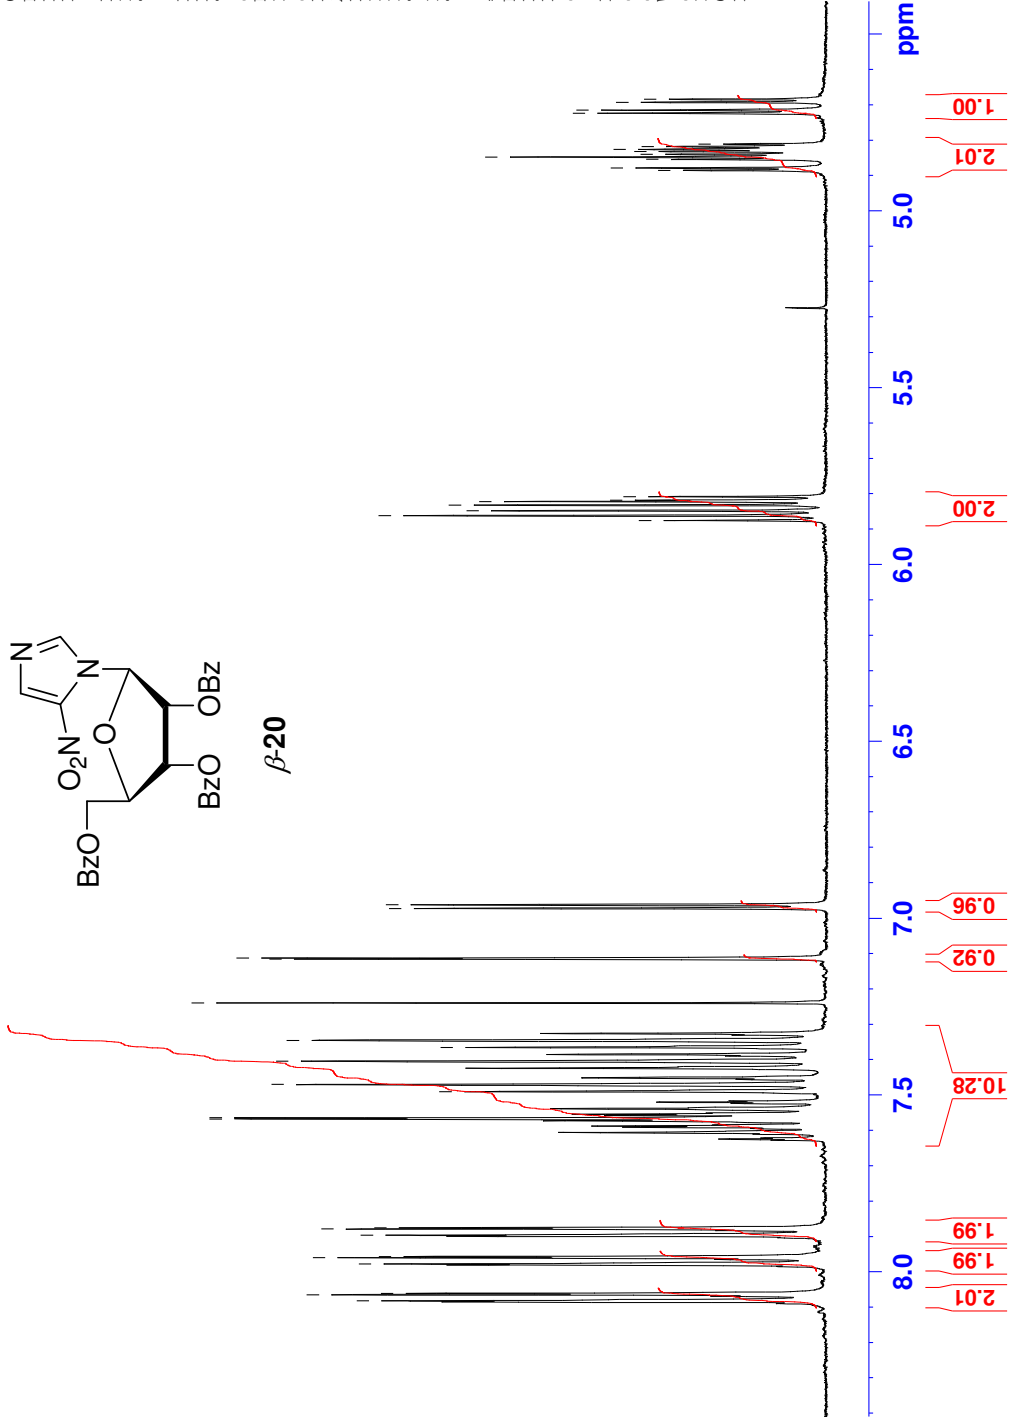

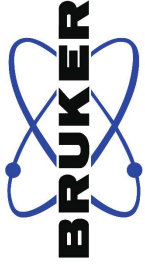

Current Data Parameters  
 NAME AW718  
 EXPNO 11  
 PROCNO 1

F2 - Acquisition Parameters  
 Date\_ 20080924  
 Time 12.06  
 INSTRUM avance400  
 PROBHD 5 mm BBO BB-IH  
 PULPROG jmod  
 TD 65536  
 SOLVENT CDCl3  
 NS 1200  
 DS 2  
 SWH 25062.656 Hz  
 FIDRES 0.382426 Hz  
 AQ 1.3074932 sec  
 RG 7298.2  
 DW 19.950 usec  
 DE 6.00 usec  
 TE 300.2 K  
 CNST2 145.000000  
 CNST11 1.0000000  
 D1 2.0000000 sec  
 d20 0.0068965 sec  
 DELTA 0.00001311 sec  
 TD0 1

==== CHANNEL f1 =====  
 NUC1 13C  
 P1 10.30 usec  
 P2 20.60 usec  
 PL1 -1.00 dB  
 SFO1 100.6233329 MHz

==== CHANNEL f2 =====  
 CPDPRG2 waltz16  
 NUC2 1H  
 P1 100.00 usec  
 PL2 -3.00 dB  
 PL12 16.00 dB  
 SFO2 400.1316005 MHz

F2 - Processing parameters  
 SI 32768  
 SF 100.6127707 MHz  
 WDW no  
 SSB 0  
 LB 0 Hz  
 GB 0  
 PC 1.40

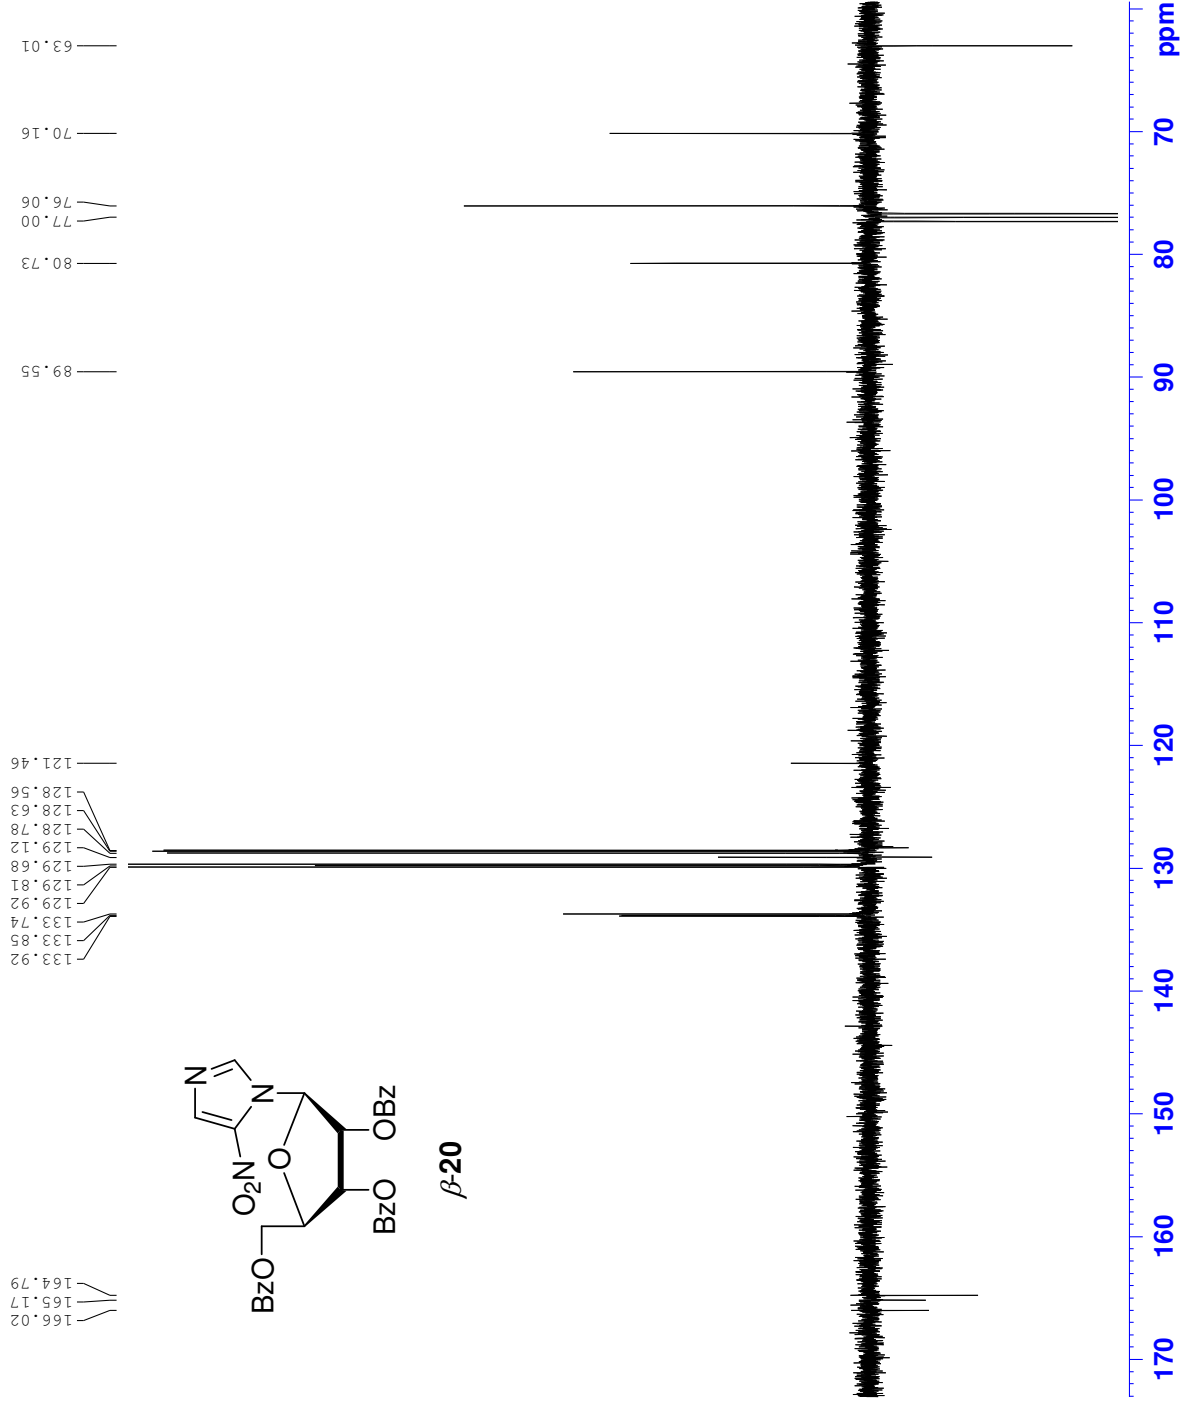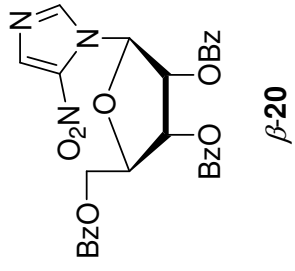

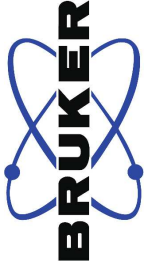

Current Data Parameters  
 NAME AW718  
 EXPNO 90  
 PROCNO 1

F2 - Acquisition Parameters  
 Date\_ 20080925  
 Time 15.21  
 INSTRUM avance400  
 PROBHD 5 mm BBO BB-1H  
 PULPROG zgpg30  
 ID 65536  
 SOLVENT CDC13  
 NS 1024  
 DS 4  
 SWH 23980.814 Hz  
 FIDRES 0.365918 Hz  
 AQ 1.36664756 sec  
 RG 8192  
 DW 20.850 usec  
 DE 6.00 usec  
 TE 300.2 K  
 D1 2.00000000 sec  
 d11 0.03000000 sec  
 DELTA 1.89999998 sec  
 TD0 1

==== CHANNEL f1 =====  
 NUC1 13C  
 P1 10.30 usec  
 PL1 -1.00 dB  
 SFO1 100.6228298 MHz

==== CHANNEL f2 =====  
 CPDPRG2 waltz16  
 NUC2 1H  
 P2 100.00 usec  
 PL2 -3.00 dB  
 PL12 16.00 dB  
 PL13 20.00 dB  
 SFO2 400.1316005 MHz

F2 - Processing parameters  
 SI 32768  
 SF 100.6127716 MHz  
 WDW EM  
 SSB 0  
 LB 0.30 Hz  
 GB 0  
 PC 1.40

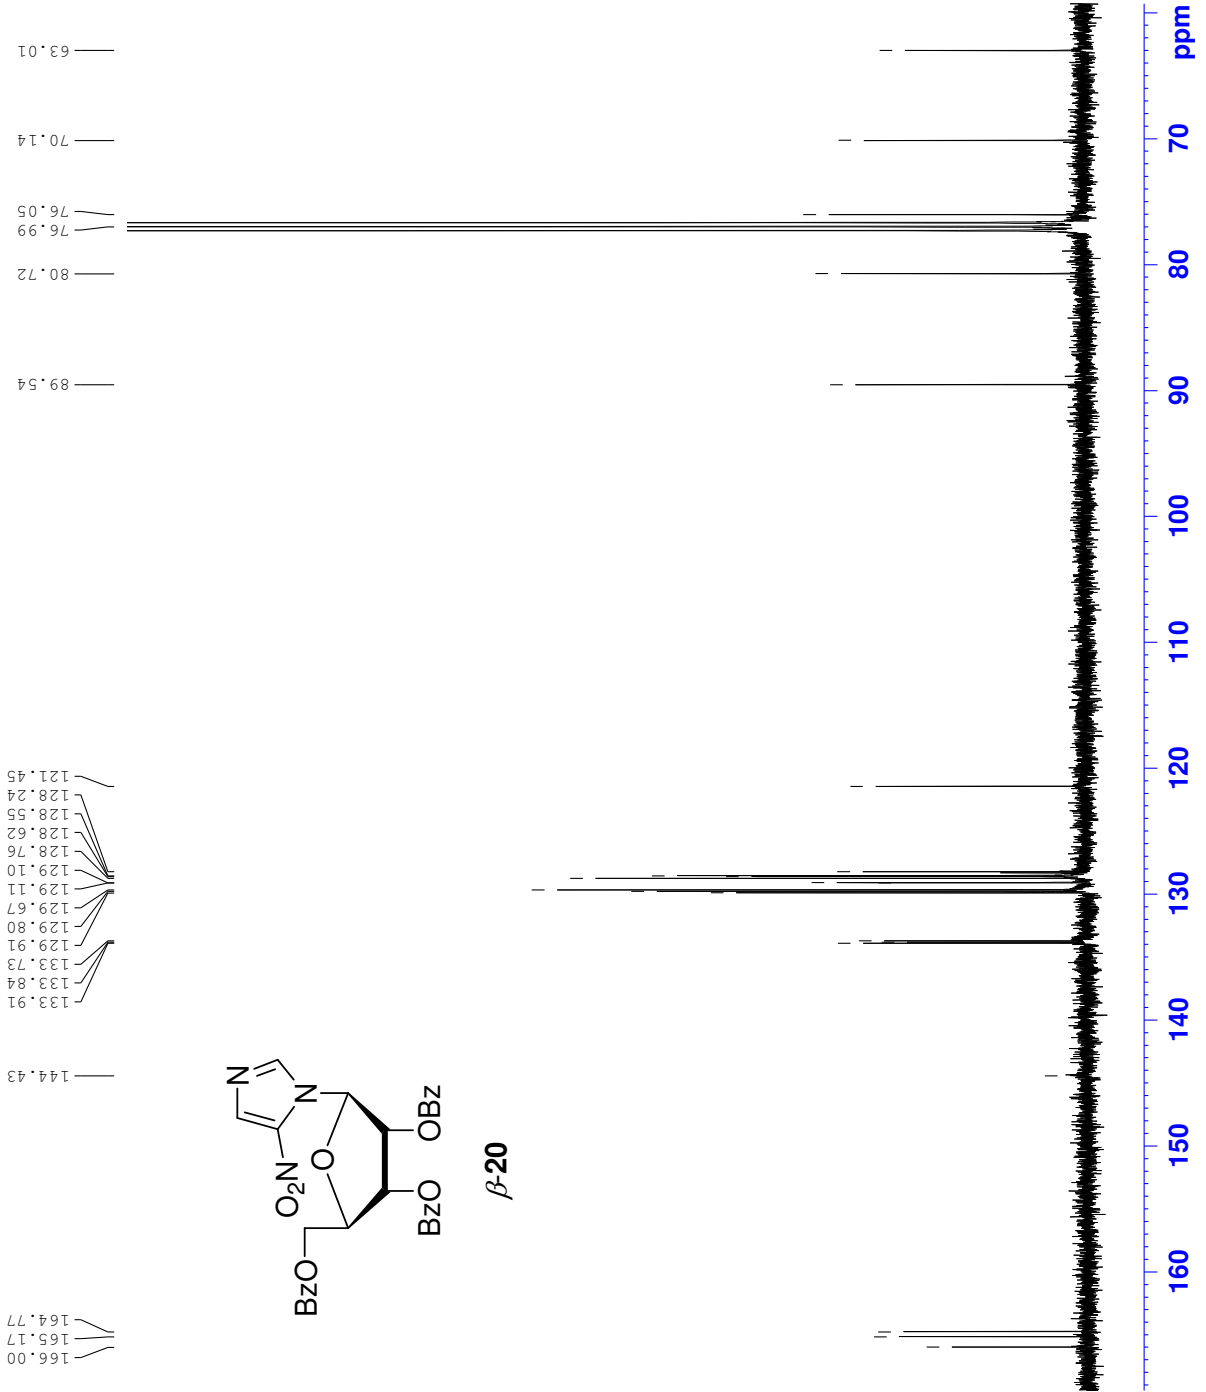

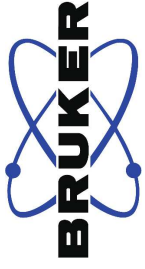

Current Data Parameters  
 NAME AM642  
 EXPNO 110  
 PROCNO 1

F2 - Acquisition Parameters  
 Date\_ 20050413  
 Time\_ 17.14  
 INSTRUM avance400  
 PROBHD 5 mm BBO BB-1H  
 PULPROG zg30  
 TD 65536  
 SOLVENT CDCl3  
 NS 16  
 DS 2  
 SWH 8278.146 Hz  
 FIDRES 0.126314 Hz  
 AQ 3.9584243 sec  
 RG 128  
 DW 60.400 usec  
 DE 6.00 usec  
 TE 300.0 K  
 D1 1.00000000 sec

==== CHANNEL f1 =====  
 NUC1 1H  
 P1 8.75 usec  
 PL1 -3.00 dB  
 SFO1 400.1324710 MHz

F2 - Processing parameters  
 SI 32768  
 SF 400.1300173 MHz  
 WDW no  
 SSB 0 Hz  
 LB 0  
 GB 0  
 PC 1.00

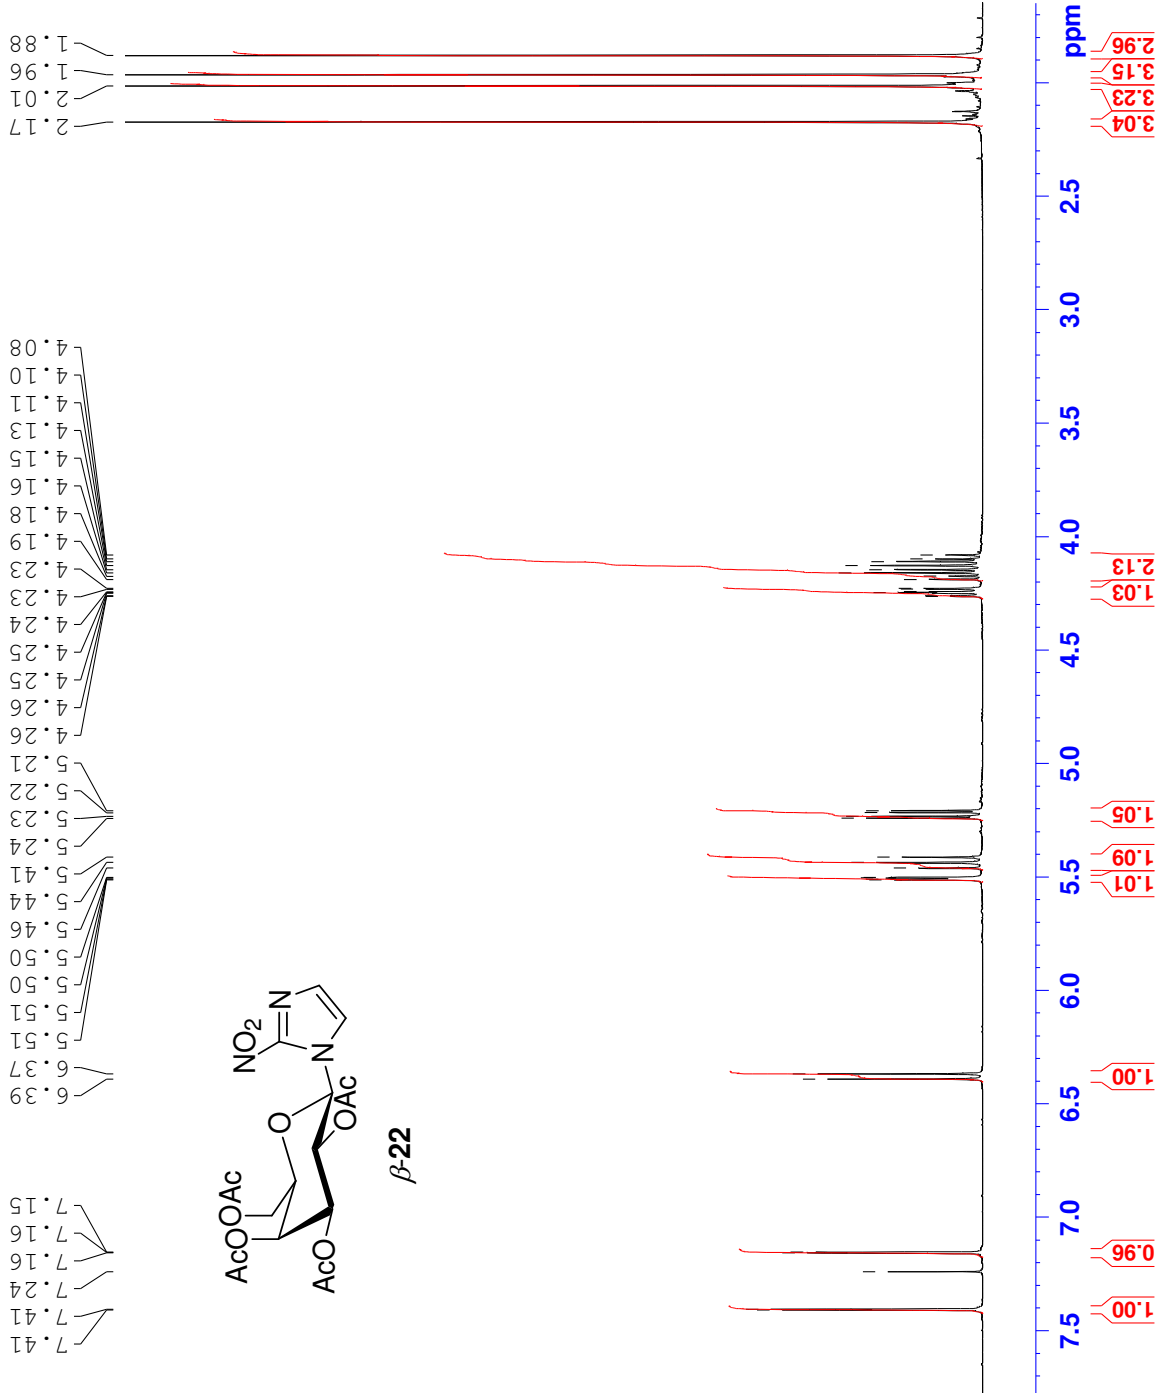

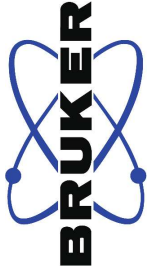

```

Current Data Parameters
NAME          AW642
EXPNO         111
PROCNO        1

F2 - Acquisition Parameters
Date_         20050413
Time          18.11
INSTRUM       avance400
PROBHD        5 mm BBO BB-1H
PULPROG       jmod
TD            65536
SOLVENT       CDCl3
NS            1000
DS            2
SMH           25062.656 Hz
FIDRES        0.382426 Hz
AQ            1.3074932 sec
RG            6502
DW            19.950 usec
DE            6.00 usec
TE            300.0 K
CNST2         145.0000000
CNST11        1.0000000
d1            2.00000000 sec
d13           0.00000300 sec
d20           0.00689655 sec
DELTA         0.00001311 sec

===== CHANNEL f1 =====
NUC1          13C
P1            10.30 usec
P2            20.60 usec
PL1           -1.00 dB
SFO1         100.6232933 MHz

===== CHANNEL f2 =====
CPDPRG2       waltz16
NUC2          1H
PCPD2         100.00 usec
PL2           -3.00 dB
PL12          16.00 dB
SFO2         400.1316005 MHz

F2 - Processing parameters
SI            32768
SF            100.6127733 MHz
WDW           no
SSB           0
LB            0 Hz
GB            0
PC            1.40
    
```

20.54  
20.36  
20.19

83.53  
77.00  
74.24  
70.87  
68.65  
66.96  
61.11

128.93  
122.09

170.29  
169.80  
169.60

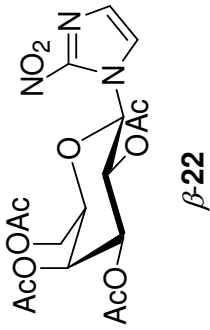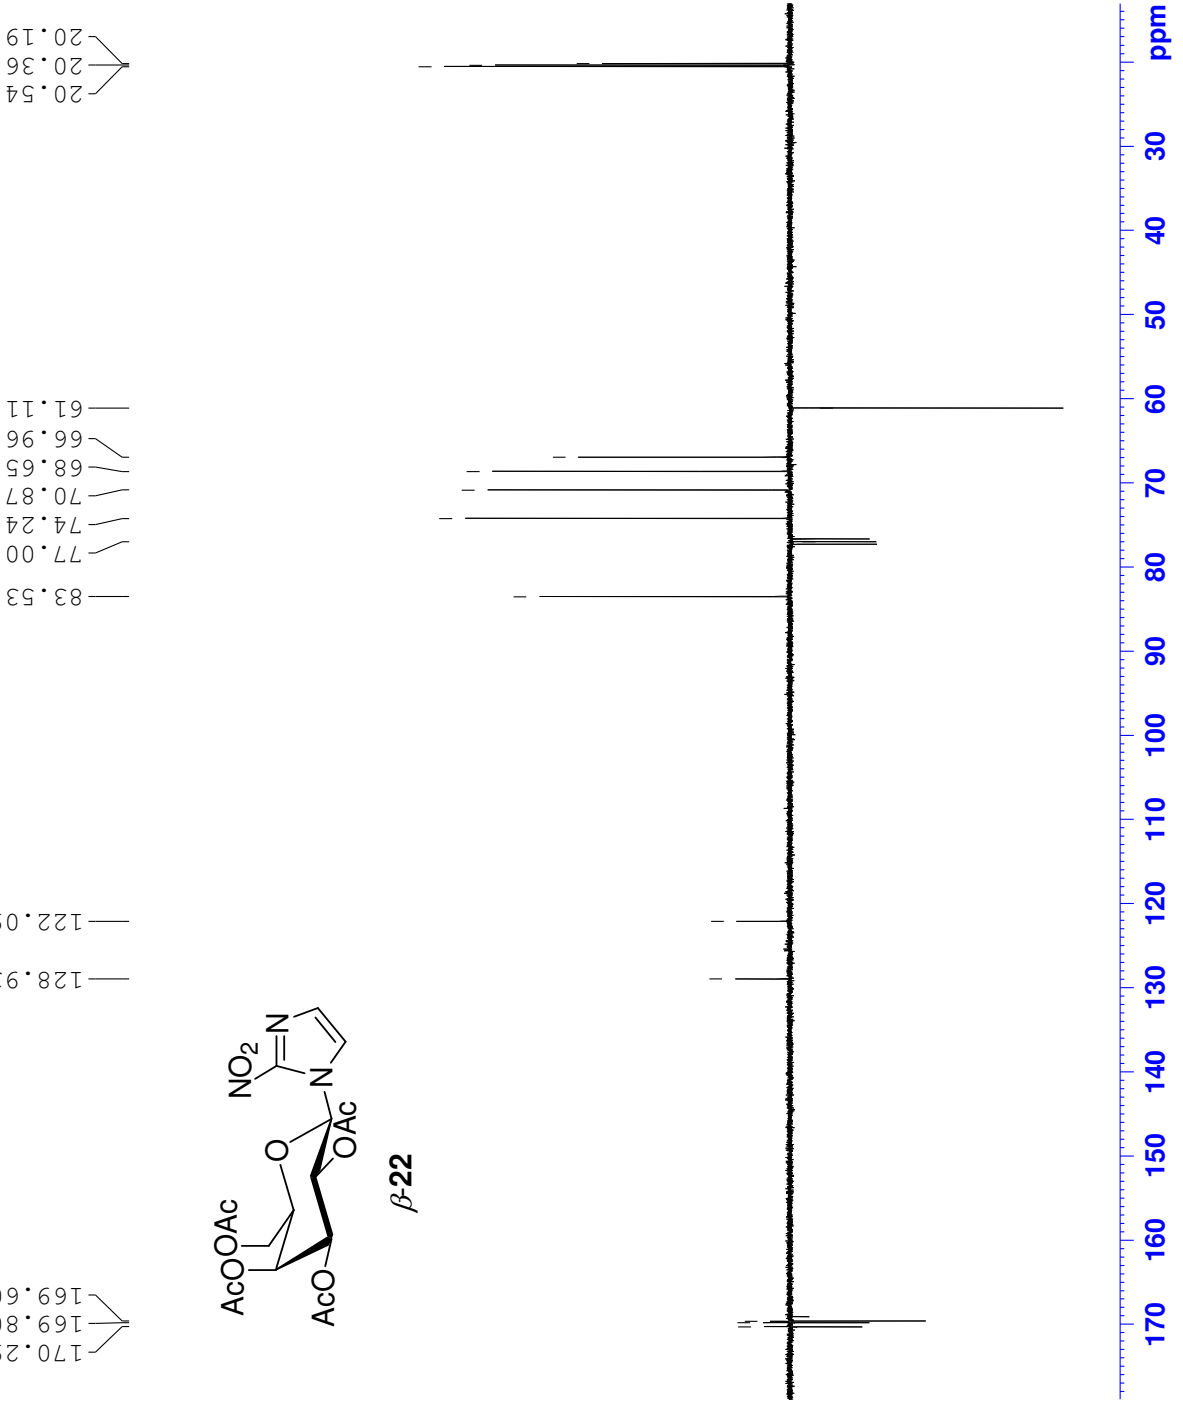



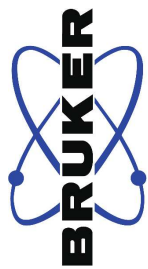

Current Data Parameters  
NAME AW642  
EXPNO 112  
PROCNO 1

F2 - Acquisition Parameters  
Date\_ 20050413  
Time 19.11  
INSTRUM avance400  
PROBHD 5 mm BBO BB-1H  
PULPROG zgpg30  
TD 65536  
SOLVENT CDCl3  
NS 1024  
DS 4  
SMH 23980.814 Hz  
FIDRES 0.365918 Hz  
AQ 1.3664756 sec  
RG 3649.1  
DW 20.850 usec  
DE 6.00 usec  
TE 300.0 K  
D1 2.0000000 sec  
d11 0.0300000 sec  
d12 0.0000200 sec

==== CHANNEL f1 =====  
NUC1 13C  
P1 10.30 usec  
PL1 -1.00 dB  
SFO1 100.6228298 MHz

==== CHANNEL f2 =====  
CPDPRG2 waltz16  
NUC2 1H  
PCPD2 100.00 usec  
PL2 -3.00 dB  
PL12 16.00 dB  
PL13 20.00 dB  
SFO2 400.1316005 MHz

F2 - Processing parameters  
SI 32768  
SF 100.6127741 MHz  
WDW no  
SSB 0  
LB 0 Hz  
GB 0  
PC 1.40

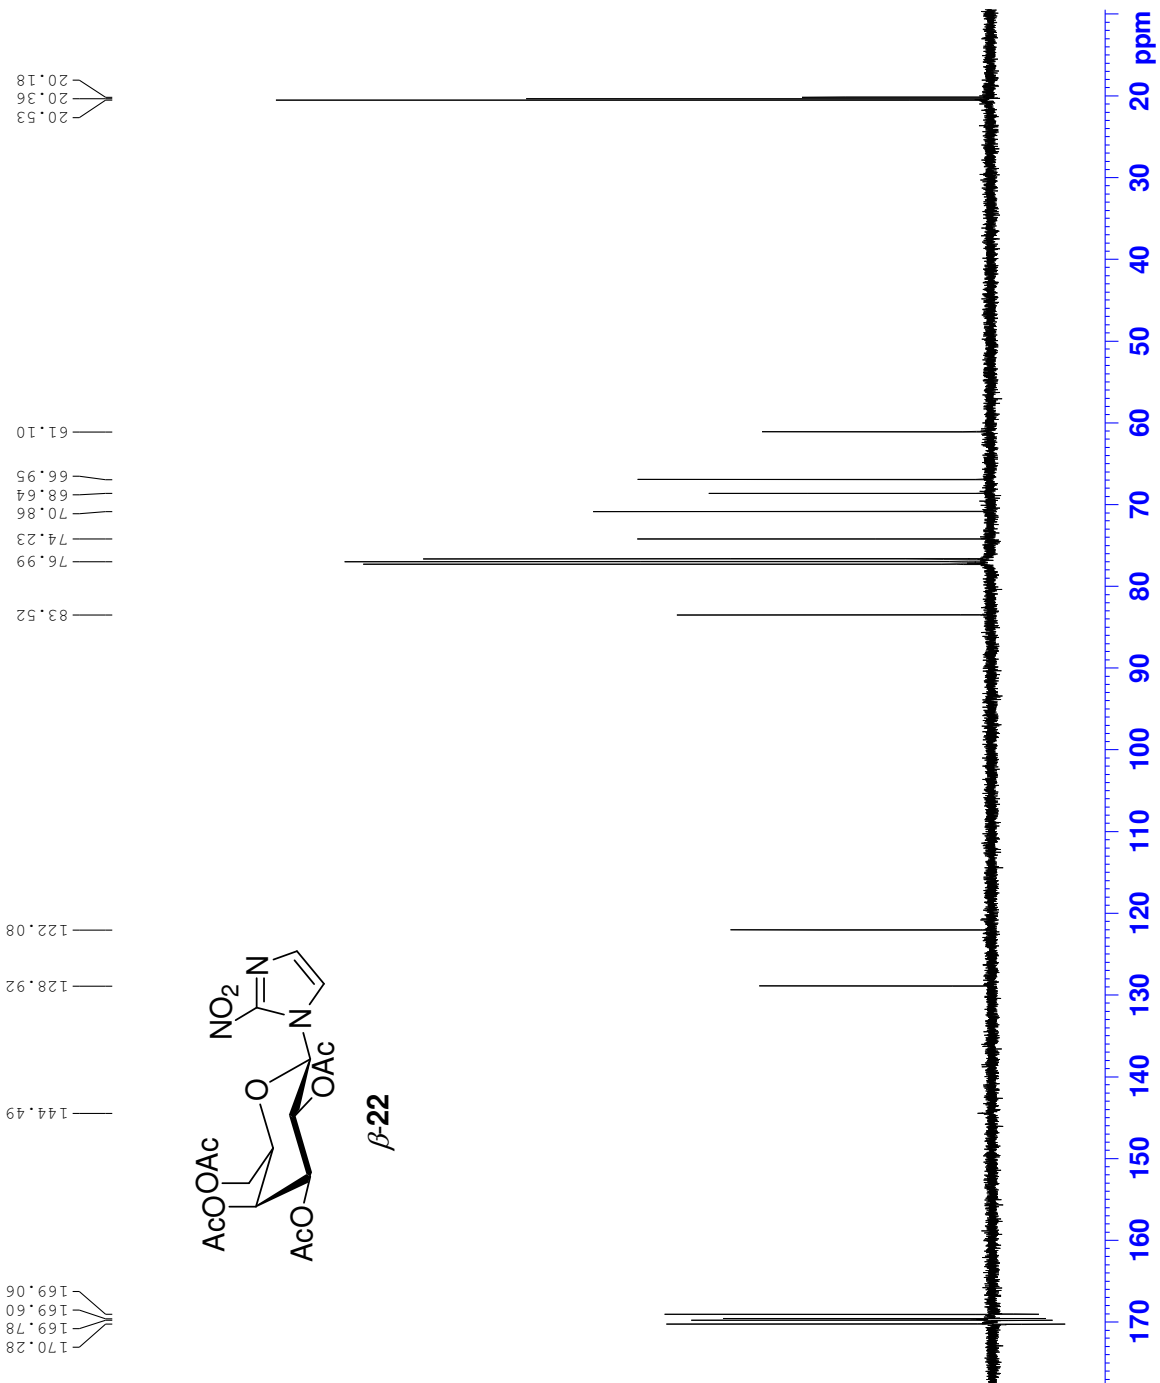

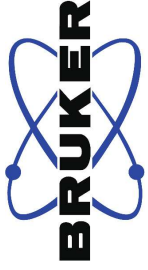

```

Current Data Parameters
NAME      AW567
EXPNO    10
PROCNO   1

F2 - Acquisition Parameters
Date_    20050913
Time     10.33
INSTRUM  avance400
PROBHD   5 mm BBO BB-1H
PULPROG  zg30
TD       65536
SOLVENT  CDCl3
NS       16
DS       2
SWH      8278.146 Hz
FIDRES   0.126314 Hz
AQ       3.9584243 sec
RG       181
DE       60.400 usec
TE       300.2 K
D1       1.00000000 sec
TD0      1

===== CHANNEL f1 =====
NUC1     1H
P1       8.75 usec
PL1      -3.00 dB
SFO1     400.1324710 MHz

F2 - Processing parameters
SI       32768
SF       400.1300173 MHz
WDW      no
SSB      0
LB       0 Hz
GB       0
PC       1.00
    
```

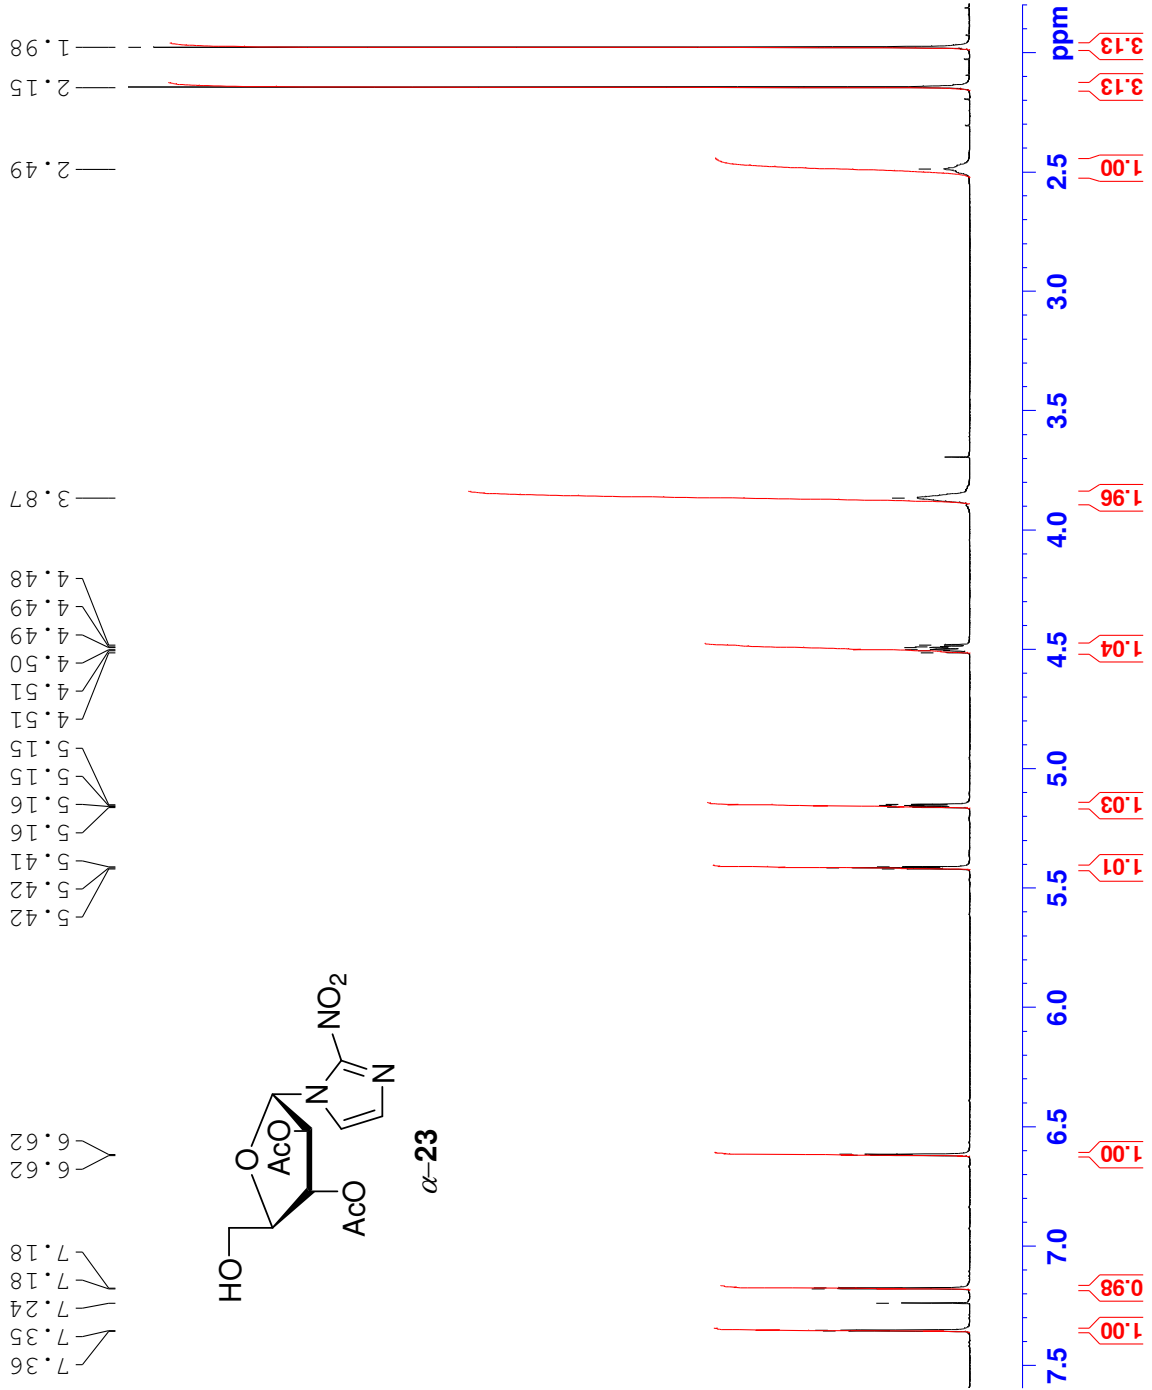



Current Data Parameters  
NAME AW567  
EXENO 11  
PROCNO 1

F2 - Acquisition Parameters  
Date\_ 20050913  
Time\_ 10.40  
INSRUM avance400  
PROBHD 5 mm BBO BB-LH  
PULPROG jmod  
TD 65536  
SOLVENT CDCl3  
NS 121  
DS 2  
SWH 25062.656 Hz  
FIDRES 0.382426 Hz  
AQ 1.3074932 sec  
RG 7298.2  
DE 19.950 usec  
TE 300.2 K  
CNS12 145.000000  
CNS11 1.0000000  
D1 2.0000000 sec  
d20 0.00689655 sec  
DELTA 0.00001311 sec  
TD0 1

==== CHANNEL f1 =====  
NUC1 13C  
P1 10.30 usec  
P2 20.60 usec  
PL1 -1.00 dB  
SFO1 100.6233329 MHz

==== CHANNEL f2 =====  
CPDPRG2 waltz16  
NUC2 1H  
PCPD2 100.00 usec  
PL2 -3.00 dB  
PL12 16.00 dB  
SFO2 400.1316005 MHz

F2 - Processing parameters  
SI 32768  
SF 100.6127737 MHz  
WDW no  
SSB 0  
LB 0 Hz  
GB 0  
PC 1.40

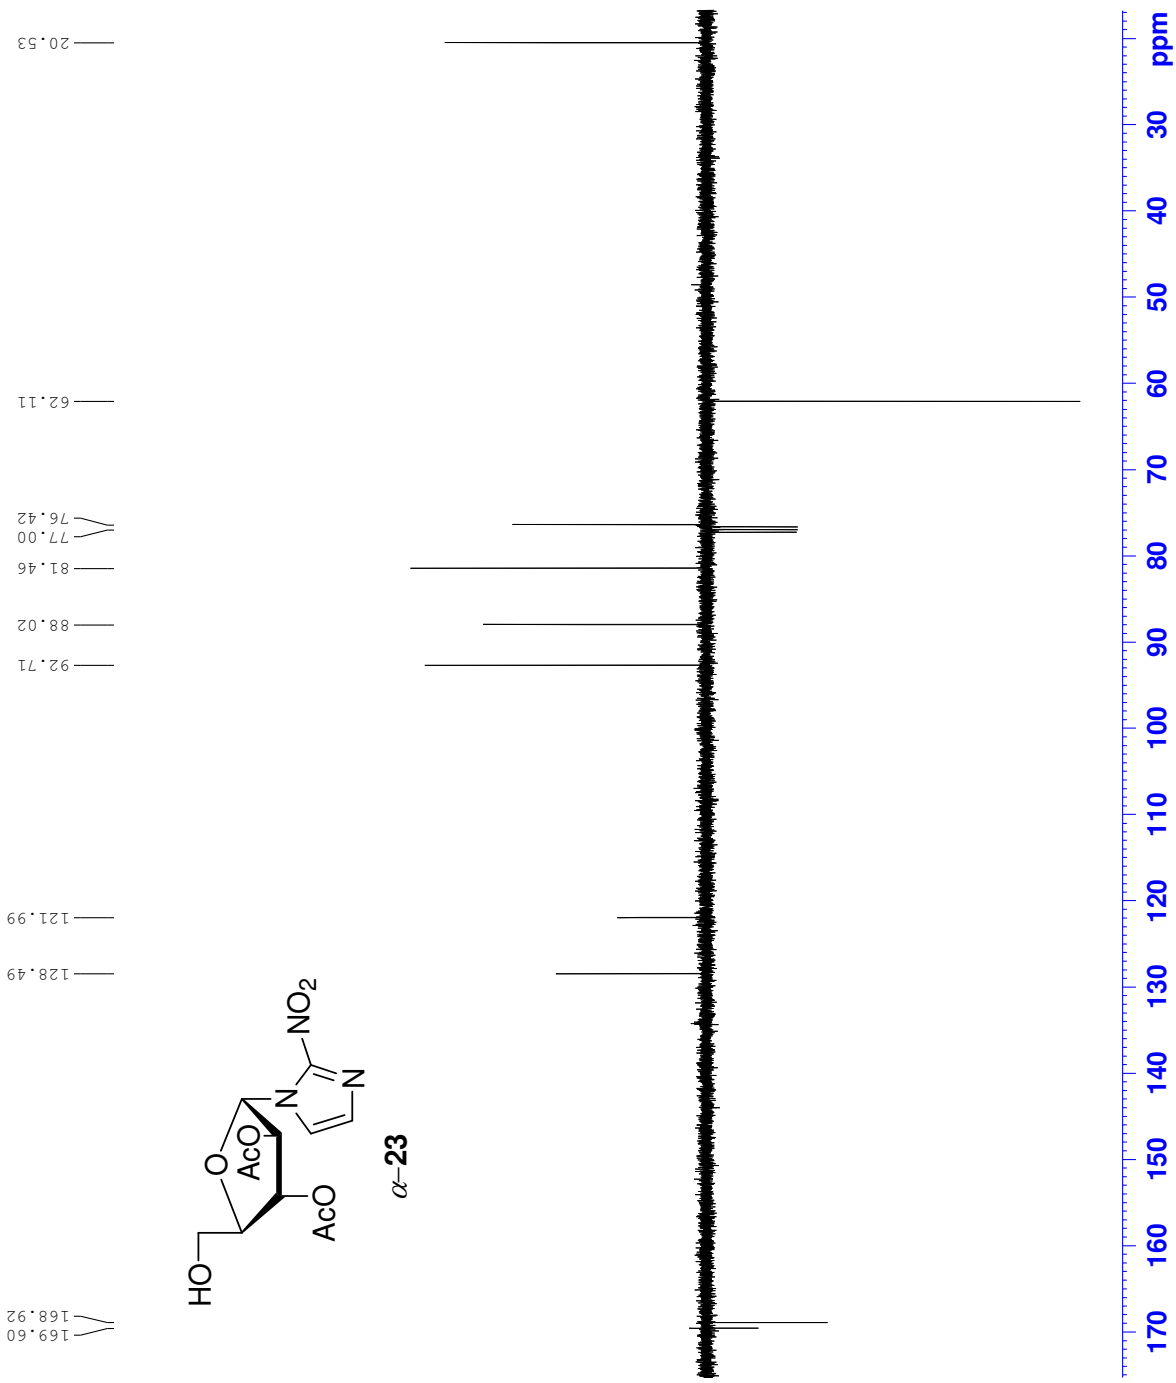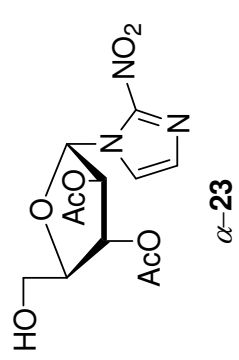

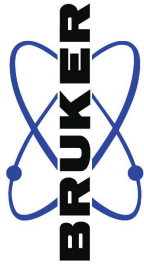

20.55  
20.54

Current Data Parameters  
NAME AW567\_W1  
EXPNO 12  
PROCNO 1

F2 - Acquisition Parameters  
Date\_ 20050913  
Time 10.43  
INSTRUM avance400  
PROBHD 5 mm BBO BB-1H  
PULPROG zgpg30  
TD 65536  
SOLVENT CDCl3  
NS 622  
DS 4  
SWH 23980.814 Hz  
FIDRES 0.365918 Hz  
AQ 1.3664756 sec  
RG 4096  
DW 20.850 usec  
DE 6.00 usec  
TE 300.2 K  
D1 2.0000000 sec  
d11 0.0300000 sec  
DELTA 1.8999998 sec  
TDO 1

==== CHANNEL f1 =====  
NUC1 13C  
P1 10.30 usec  
PL1 -1.00 dB  
SFO1 100.6228298 MHz

==== CHANNEL f2 =====  
CPDPRG2 waltz16  
NUC2 1H  
PCPD2 100.00 usec  
PL2 -3.00 dB  
PL12 16.00 dB  
PL13 20.00 dB  
SFO2 400.1316005 MHz

F2 - Processing parameters  
SI 32768  
SF 100.6127731 MHz  
WDW EM  
SSB 0  
LB 0.30 Hz  
GB 0  
PC 1.40

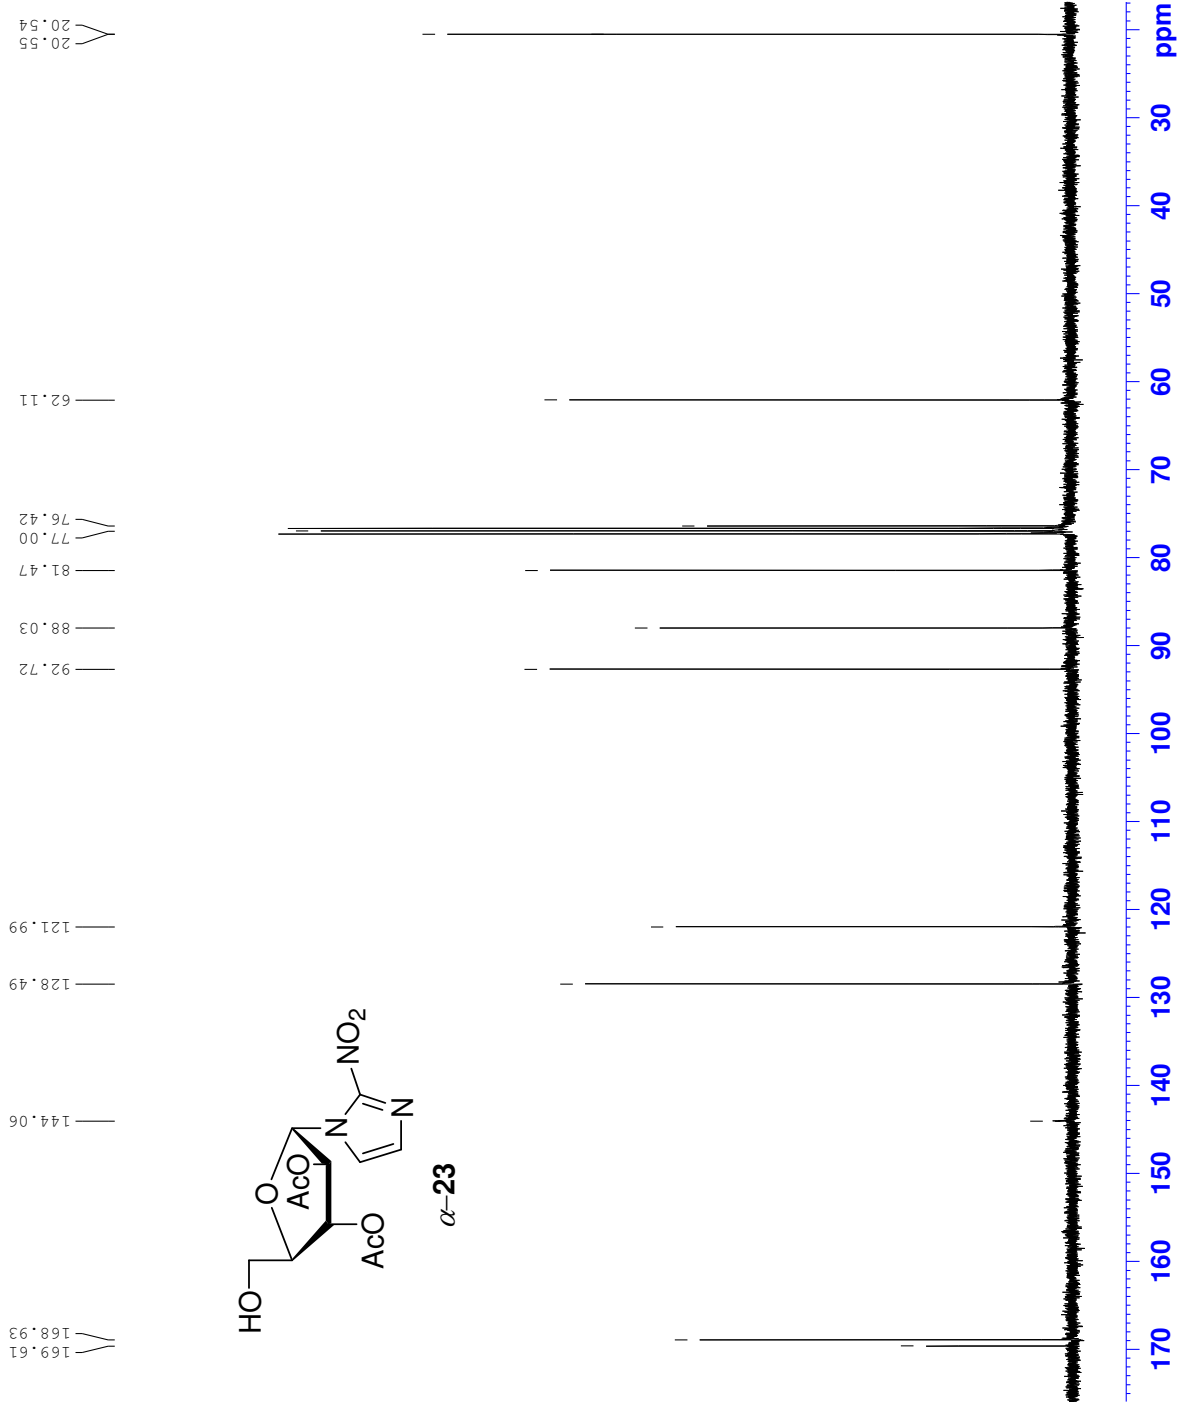

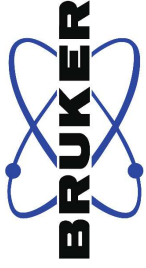

Current Data Parameters  
 NAME ZH 813W alpha  
 EXPNO 10  
 PROCNO 1

F2 - Acquisition Parameters  
 Date\_ 20090317  
 Time 11.20  
 INSTRUM avance400  
 PROBHD 5 mm BBO BB-1H  
 PULPROG zg30  
 TD 65536  
 SOLVENT CDCl3  
 NS 16  
 DS 2  
 SWH 8278.146 Hz  
 FIDRES 0.126314 Hz  
 AQ 3.9584243 sec  
 RG 114  
 DW 60.400 usec  
 DE 6.00 usec  
 TE 300.0 K  
 D1 1.00000000 sec  
 TD0 1

==== CHANNEL f1 =====  
 NUC1 1H  
 P1 8.75 usec  
 PL1 -3.00 dB  
 SFO1 400.1324710 MHz

F2 - Processing parameters  
 SI 32768  
 SF 400.1300170 MHz  
 WDW EM  
 SSB 0  
 LB 0.30 Hz  
 GB 0  
 PC 1.00

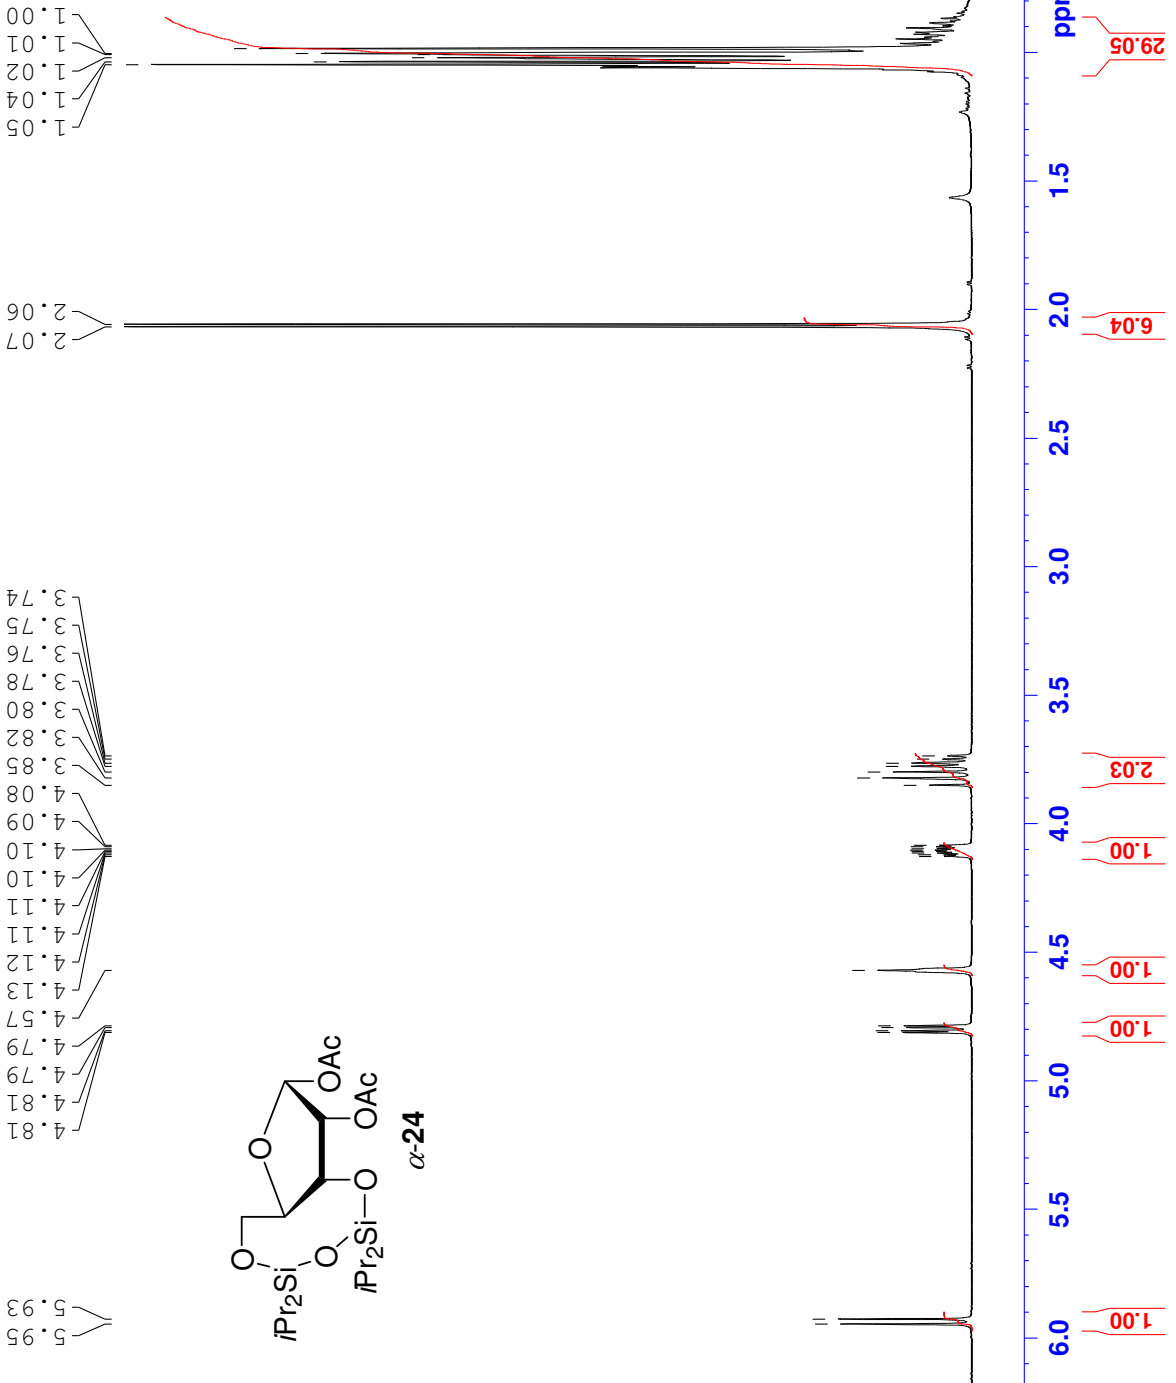

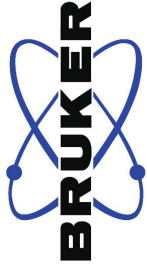

Current Data Parameters  
NAME ZH 813W alpha  
EXPNO 11  
PROCNO 1

F2 - Acquisition Parameters  
Date\_ 20090317  
Time 11.57  
INSTRUM avances400  
PROBHD 5 mm BBO BB-1H  
PULPROG jmod  
TD 65536  
SOLVENT CDCl3  
NS 648  
DS 2  
SWH 25062.656 Hz  
FIDRES 0.382426 Hz  
AQ 1.3074932 sec  
RG 4597.6  
DW 19.950 usec  
DE 6.00 usec  
TE 300.2 K  
CNS12 145.0000000  
CNS11 1.0000000  
D1 2.0000000 sec  
d20 0.00689655 sec  
DELTA 0.00001311 sec  
TD0 1

==== CHANNEL f1 =====  
NUC1 13C  
P1 10.30 usec  
P2 20.60 usec  
PL1 -1.00 dB  
SFO1 100.6233329 MHz

==== CHANNEL f2 =====  
CPDPRG2 waltz16  
NUC2 1H  
PCPD2 100.00 usec  
PL2 -3.00 dB  
PL12 16.00 dB  
SFO2 400.1316005 MHz

F2 - Processing parameters  
SI 32768  
SF 100.6127703 MHz  
WDW EM  
SSB 0  
LB 0.30 Hz  
GB 0  
PC 1.40

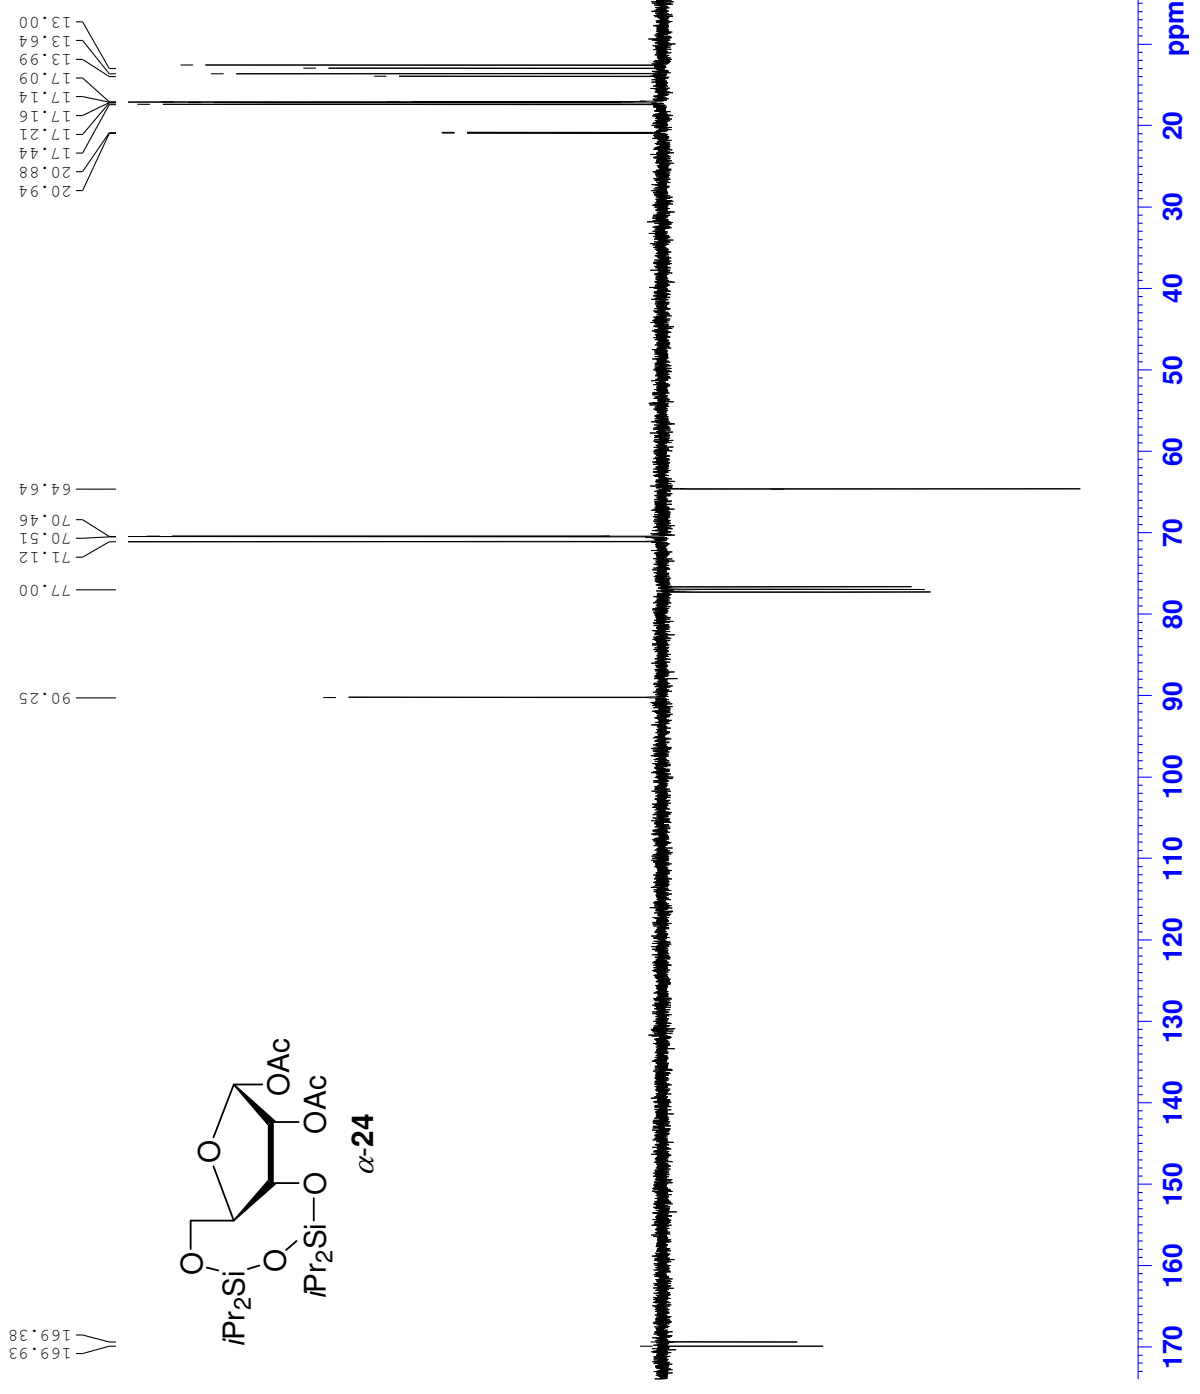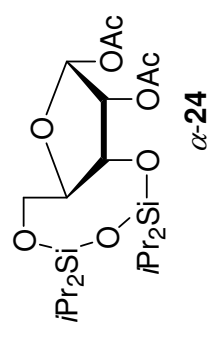

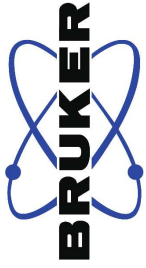

Current Data Parameters  
 NAME AM699\_Alpha  
 EXPNO 70  
 PROCNO 1

F2 - Acquisition Parameters  
 Date\_ 20060119  
 Time 15.49  
 INSTRUM avance400  
 PROBHD 5 mm BBO BB-1H  
 PULPROG zg30  
 TD 65536  
 SOLVENT CDCl3  
 NS 16  
 DS 2  
 SWH 8278.146 Hz  
 FIDRES 0.126314 Hz  
 AQ 3.9584243 sec  
 RG 114  
 DW 60.400 usec  
 DE 6.00 usec  
 TE 300.2 K  
 D1 1.00000000 sec  
 TD0 1

==== CHANNEL f1 =====  
 NUC1 1H  
 P1 8.75 usec  
 PL1 -3.00 dB  
 SFO1 400.1324710 MHz

F2 - Processing parameters  
 SI 32768  
 SF 400.1300171 MHz  
 WDW EM  
 SSB 0  
 LB 0.30 Hz  
 GB 0  
 PC 1.00

1.11  
1.04  
1.03  
1.02  
1.01  
1.01

1.89

4.87  
4.85  
4.84  
4.65  
4.65  
4.64  
4.25  
4.25  
4.24  
4.23  
4.22  
4.21  
4.20  
3.94  
3.92

7.26  
7.26  
7.24  
7.11  
7.11  
7.11  
6.72  
6.69

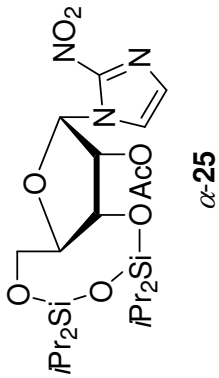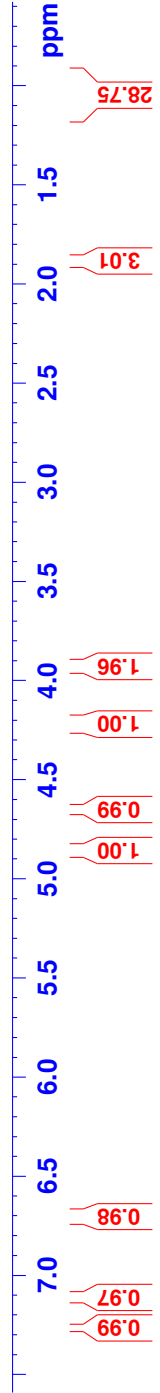

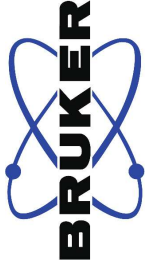

Current Data Parameters  
 NAME AW699\_Alpha  
 EXPNO 71  
 PROCNO 1

F2 - Acquisition Parameters  
 Date\_ 20060119  
 Time 16.36  
 INSTRUM avance400  
 PROBHD 5 mm BBO BB-1H  
 PULPROG jmod  
 TD 65536  
 SOLVENT CDCl3  
 NS 800  
 DS 2  
 SWH 25062.656 Hz  
 FIDRES 0.382426 Hz  
 AQ 1.3074932 sec  
 RG 14596.5  
 DW 19.950 usec  
 DE 6.00 usec  
 TE 300.2 K  
 CNST2 145.000000  
 CNST11 1.000000  
 D1 2.0000000 sec  
 d20 0.00689655 sec  
 DELTA 0.00001311 sec  
 TD0 1

==== CHANNEL f1 =====  
 NUC1 13C  
 P1 10.30 usec  
 PL1 20.60 usec  
 PL2 -1.00 dB  
 SFO1 100.6233329 MHz

==== CHANNEL f2 =====  
 CPDPRG2 waltz16  
 NUC2 1H  
 PCPD2 100.00 usec  
 PL2 -3.00 dB  
 PL12 16.00 dB  
 SFO2 400.1316005 MHz

F2 - Processing parameters  
 SI 32768  
 SF 100.6127709 MHz  
 WDW no  
 SSB 0  
 LB 0 Hz  
 GB 0  
 PC 1.40

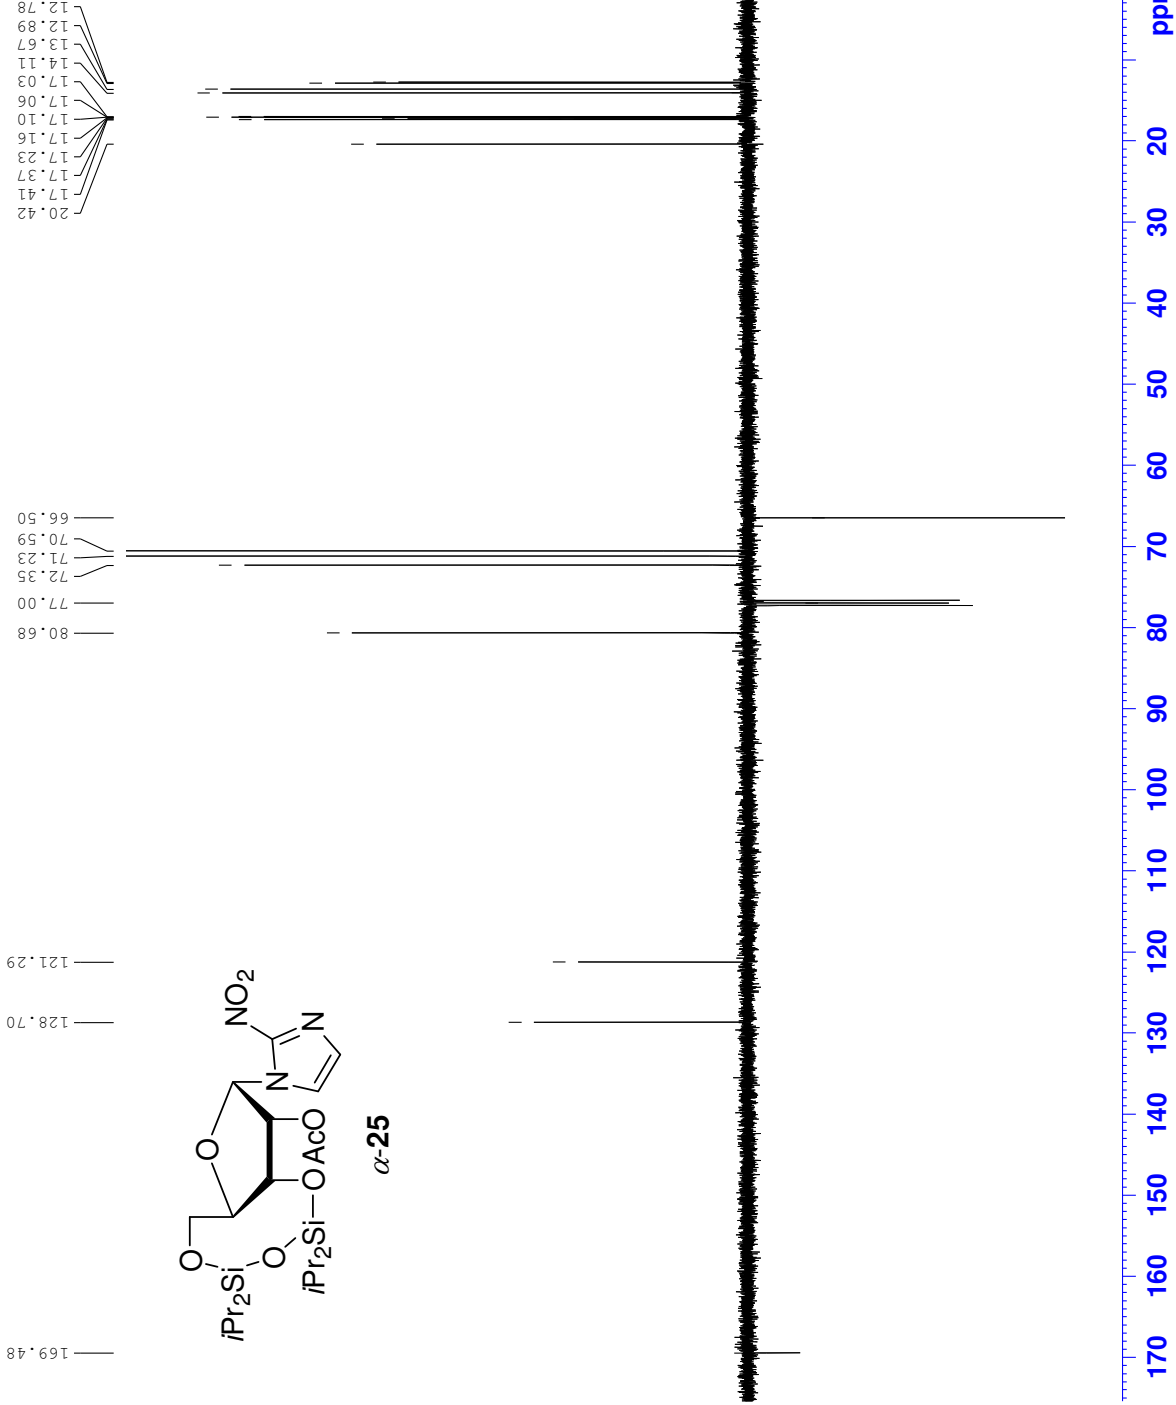





12.89  
13.67  
14.11  
17.02  
17.06  
17.10  
17.16  
17.22  
17.37  
17.40  
20.42

66.49  
70.59  
71.22  
72.35  
77.00  
80.68

121.29  
128.70  
144.88  
169.49

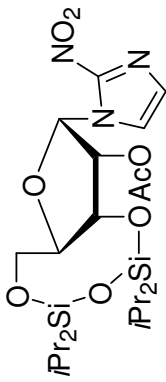 $\alpha$ -25

Current Data Parameters  
 NAME AW699\_Alpha  
 EXPNO 72  
 PROCNO 1  
 F2 - Acquisition Parameters  
 Date\_ 20060119  
 Time 17.22  
 INSTRUM avance400  
 PROBHD 5 mm BBO BB-1H  
 PULPROG zgpg30  
 TD 65536  
 SOLVENT CDCl3  
 NS 800  
 DS 4  
 SWH 23980.814 Hz  
 FIDRES 0.365918 Hz  
 AQ 1.3664756 sec  
 RG 3649.1  
 DM 20.850 usec  
 DE 6.00 usec  
 TE 300.2 K  
 d1 2.0000000 sec  
 d11 0.0300000 sec  
 DELTA 1.8999998 sec  
 TD0 1  
 ===== CHANNEL f1 =====  
 NUC1 13C  
 P1 10.30 usec  
 PL1 -1.00 dB  
 SFO1 100.6228298 MHz  
 ===== CHANNEL f2 =====  
 CPDPRG2 waltz16  
 NUC2 1H  
 P2 100.00 usec  
 PL2 -3.00 dB  
 PL12 16.00 dB  
 PL13 20.00 dB  
 SFO2 400.1316005 MHz  
 F2 - Processing parameters  
 SI 32768  
 SF 100.6127712 MHz  
 WDW EM  
 SSB 0  
 LB 0  
 GB 0  
 PC 1.40

ppm

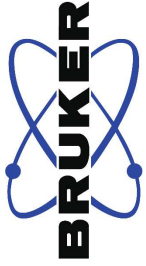

Current Data Parameters  
NAME AM699\_Beta  
EXPNO 150  
PROCNO 1

F2 - Acquisition Parameters  
Date\_ 20060119  
Time 2.02  
INSTRUM advance400  
PROBHD 5 mm BBO BB-1H  
PULPROG zg30  
TD 65536  
SOLVENT CDCl3  
NS 16  
DS 2  
SWH 8278.146 Hz  
FIDRES 0.126314 Hz  
AQ 3.9584243 sec  
RG 128  
DW 60.400 usec  
DE 6.00 usec  
TE 300.2 K  
D1 1.00000000 sec  
TD0 1

==== CHANNEL f1 =====  
NUC1 1H  
P1 8.75 usec  
PL1 -3.00 dB  
SFO1 400.1324710 MHz

F2 - Processing parameters  
SI 32768  
WDW no  
SSB 0  
LB 0 Hz  
GB 0  
PC 1.00

7.78  
7.77  
7.24  
7.14  
7.14  
6.34  
5.47  
5.46  
4.45  
4.43  
4.42  
4.41  
4.29  
4.26  
4.12  
4.11  
4.09  
4.09  
4.02  
4.01  
3.98  
3.98  
1.08  
1.08  
1.08  
1.04  
1.03  
0.98  
0.98  
0.97  
0.96  
0.95

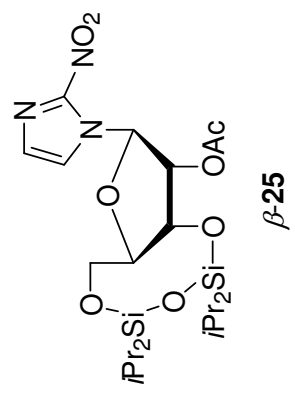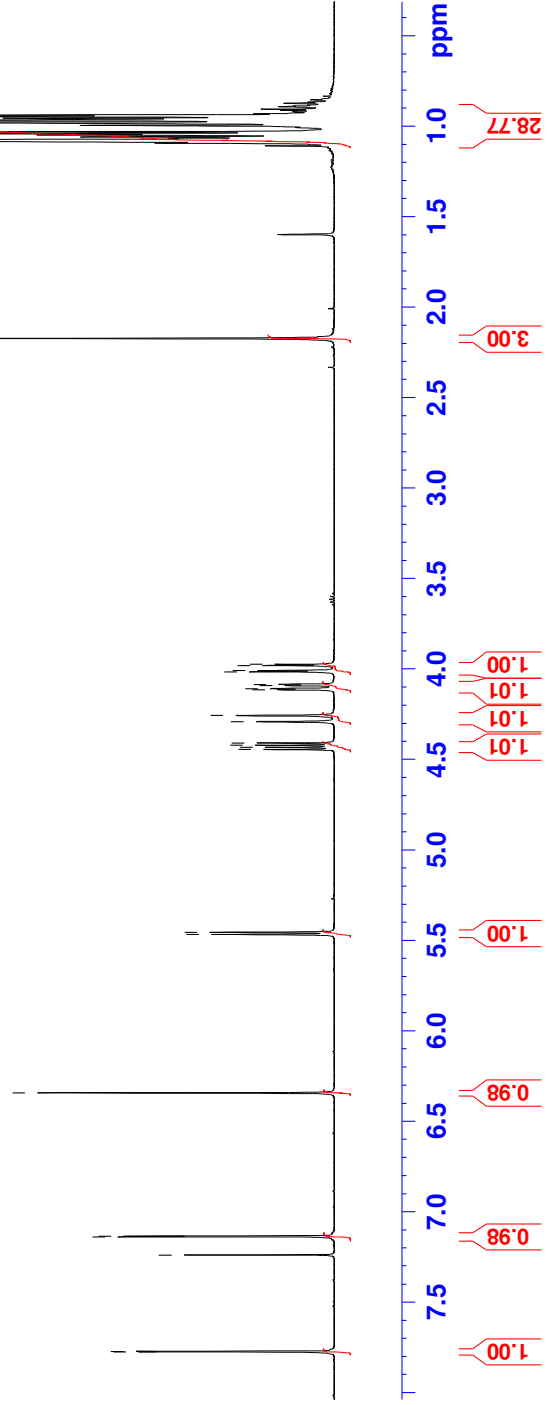

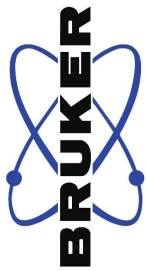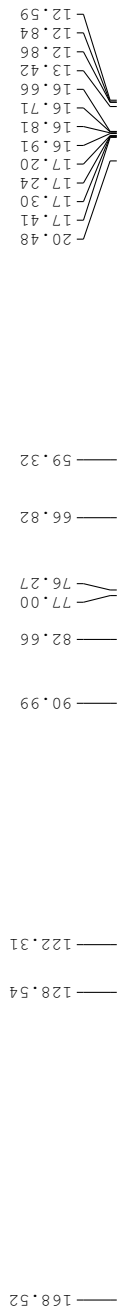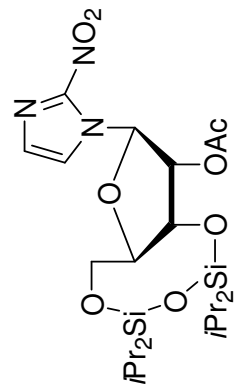

Current Data Parameters  
 NAME AW699\_Beta  
 EXPNO 151  
 PROCNO 1

F2 - Acquisition Parameters  
 Date\_ 20060119  
 Time 2.48  
 INSTRUM avance400  
 PROBHD 5 mm BBO BB-1H  
 PULPROG jmod  
 TD 65536  
 SOLVENT CDCl3  
 NS 800  
 DS 2  
 SWH 25062.656 Hz  
 FIDRES 0.382426 Hz  
 AQ 1.3074932 sec  
 RG 14596.5  
 DW 19.950 usec  
 DE 6.00 usec  
 TE 300.2 K  
 CNST2 145.0000000  
 CNST11 1.0000000  
 D1 2.0000000 sec  
 d20 0.00689655 sec  
 DELTA 0.00001311 sec  
 TD0 1

==== CHANNEL f1 =====  
 NUC1 13C  
 P1 10.30 usec  
 P2 20.60 usec  
 PL1 -1.00 dB  
 SFO1 100.6233329 MHz

==== CHANNEL f2 =====  
 CPDPRG2 waltz16  
 NUC2 1H  
 PCPD2 100.00 usec  
 PL2 -3.00 dB  
 PL12 16.00 dB  
 SFO2 400.1316005 MHz

F2 - Processing parameters  
 SI 32768  
 SF 100.6127708 MHz  
 WDW no  
 SSB 0  
 LB 0 Hz  
 GB 0  
 PC 1.40



20.48  
17.41  
17.30  
17.23  
17.19  
16.90  
16.82  
16.70  
16.66  
13.42  
12.86  
12.84  
12.58

90.99  
82.66  
77.00  
76.27  
66.82  
59.32

168.52  
143.70  
128.54  
122.31

Current Data Parameters  
 NAME AW699\_Beta  
 EXPNO 152  
 PROCNO 1  
 F2 - Acquisition Parameters  
 Date\_ 20060119  
 Time 3.35  
 INSTRUM advance400  
 PROBHD 5 mm BBO BB-1H  
 PULPROG zgpg30  
 TD 65536  
 SOLVENT CDCl3  
 NS 800  
 DS 4  
 SWH 23980.814 Hz  
 FIDRES 0.365918 Hz  
 AQ 1.3664756 sec  
 RG 10321.3  
 DW 20.850 usec  
 DE 6.00 usec  
 TE 300.2 K  
 D1 2.00000000 sec  
 d11 0.03000000 sec  
 DELTA 1.89999998 sec  
 TD0 1

==== CHANNEL f1 =====  
 NUC1 13C  
 P1 10.30 usec  
 PL1 -1.00 dB  
 SFO1 100.6228298 MHz  
 ===== CHANNEL f2 =====  
 CPDPRG2 waltz16  
 NUC2 1H  
 PCPD2 100.00 usec  
 PL2 -3.00 dB  
 PL12 16.00 dB  
 PL13 20.00 dB  
 SFO2 400.1316005 MHz  
 F2 - Processing parameters  
 SI 32768  
 SF 100.6127711 MHz  
 WDW EM  
 SSB 0  
 LB 0.30 Hz  
 GB 0  
 PC 1.40

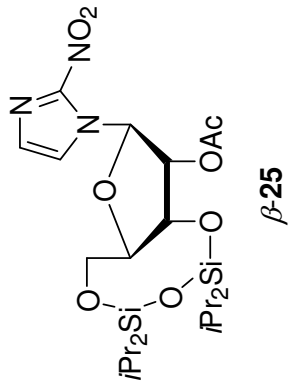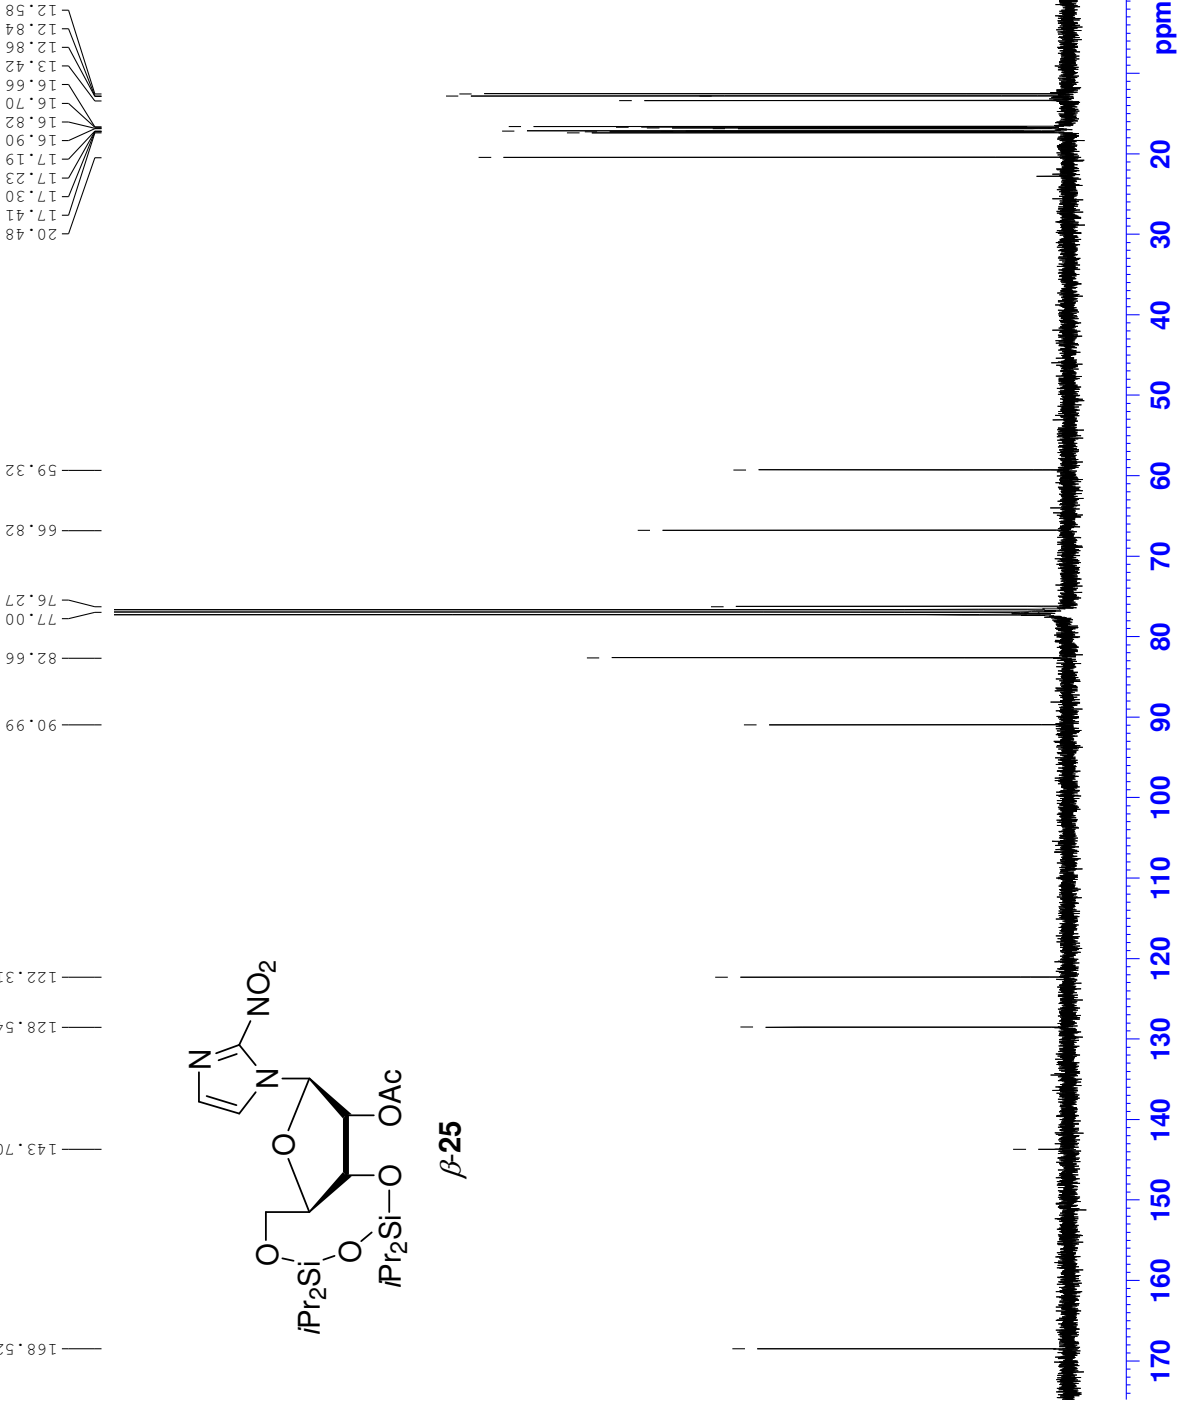

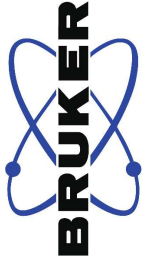

Current Data Parameters  
 NAME AW581\_W\_Alpha  
 EXNO 110  
 PROCNO 1

F2 - Acquisition Parameters  
 Date\_ 20040923  
 Time\_ 13.31  
 INSTRUM avance400  
 PROBHD 5 mm PABBO BB-  
 PULPROG zg30  
 TD 65536  
 SOLVENT CDCl3  
 NS 16  
 DS 2  
 SWH 8278.146 Hz  
 FIDRES 0.126314 Hz  
 AQ 3.9584243 sec  
 RG 203.2  
 DW 60.400 usec  
 DE 6.00 usec  
 TE 300.0 K  
 D1 1.00000000 sec

==== CHANNEL f1 =====  
 NUC1 1H  
 P1 8.75 usec  
 PL1 -3.00 dB  
 SFO1 400.1324710 MHz

F2 - Processing parameters  
 SI 32768  
 SF 400.1300173 MHz  
 WDW no  
 SSB 0  
 LB 0 Hz  
 GB 0  
 PC 1.00

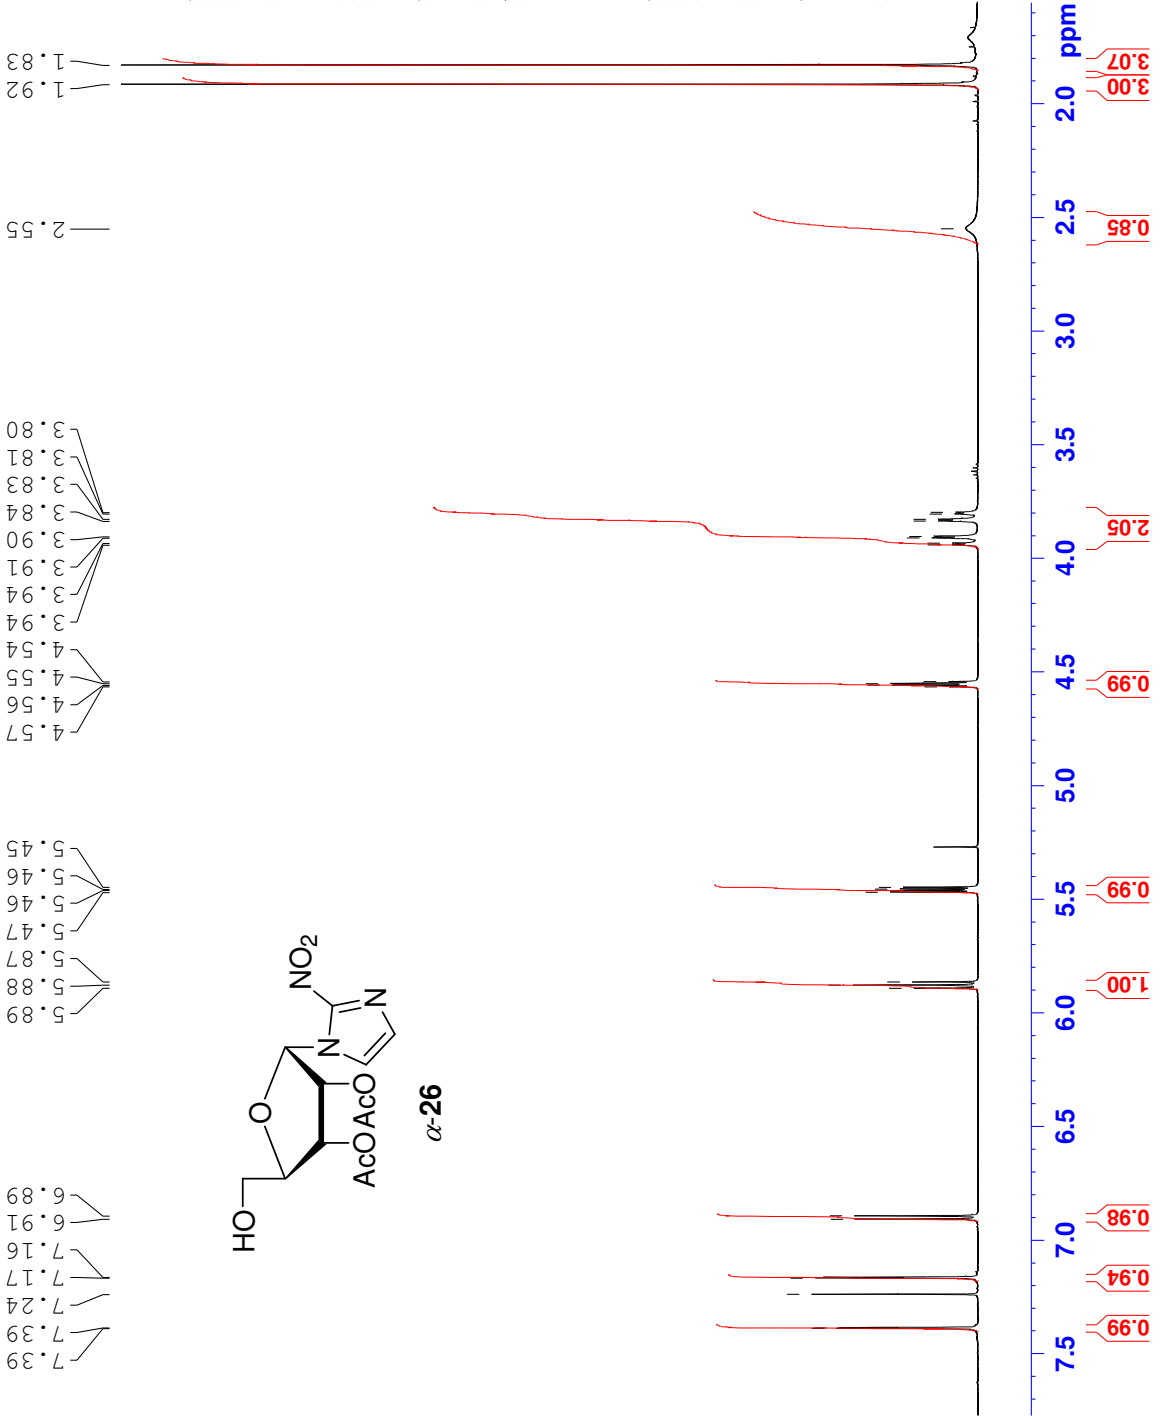

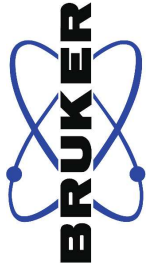

Current Data Parameters  
NAME AW581\_W\_Alpha  
EXPNO 41  
PROCNO 1

F2 - Acquisition Parameters  
Date\_ 20060403  
Time 14.44  
INSTRUM advance400  
PROBHD 5 mm BBO BB-1H  
PULPROG jmod  
TD 65536  
SOLVENT CDCl3  
NS 394  
DS 2  
SWH 25062.656 Hz  
FIDRES 0.382426 Hz  
AQ 1.3074932 sec  
RG 9195.2  
DW 19.950 usec  
DE 6.00 usec  
TE 300.2 K  
CNS12 145.0000000  
CNS11 1.0000000  
D1 2.00000000 sec  
d20 0.00689655 sec  
DELTA 0.00001311 sec  
TDO 1

==== CHANNEL f1 =====  
NUC1 13C  
P1 10.30 usec  
P2 20.60 usec  
PL1 -1.00 dB  
SFO1 100.6233329 MHz

==== CHANNEL f2 =====  
CPDPRG2 waltz16  
NUC2 1H  
PCPD2 100.00 usec  
PL2 -3.00 dB  
PL12 16.00 dB  
SFO2 400.1316005 MHz

F2 - Processing parameters  
SI 32768  
SF 100.6127728 MHz  
WDW no  
SSB 0  
LB 0 Hz  
GB 0  
PC 1.40

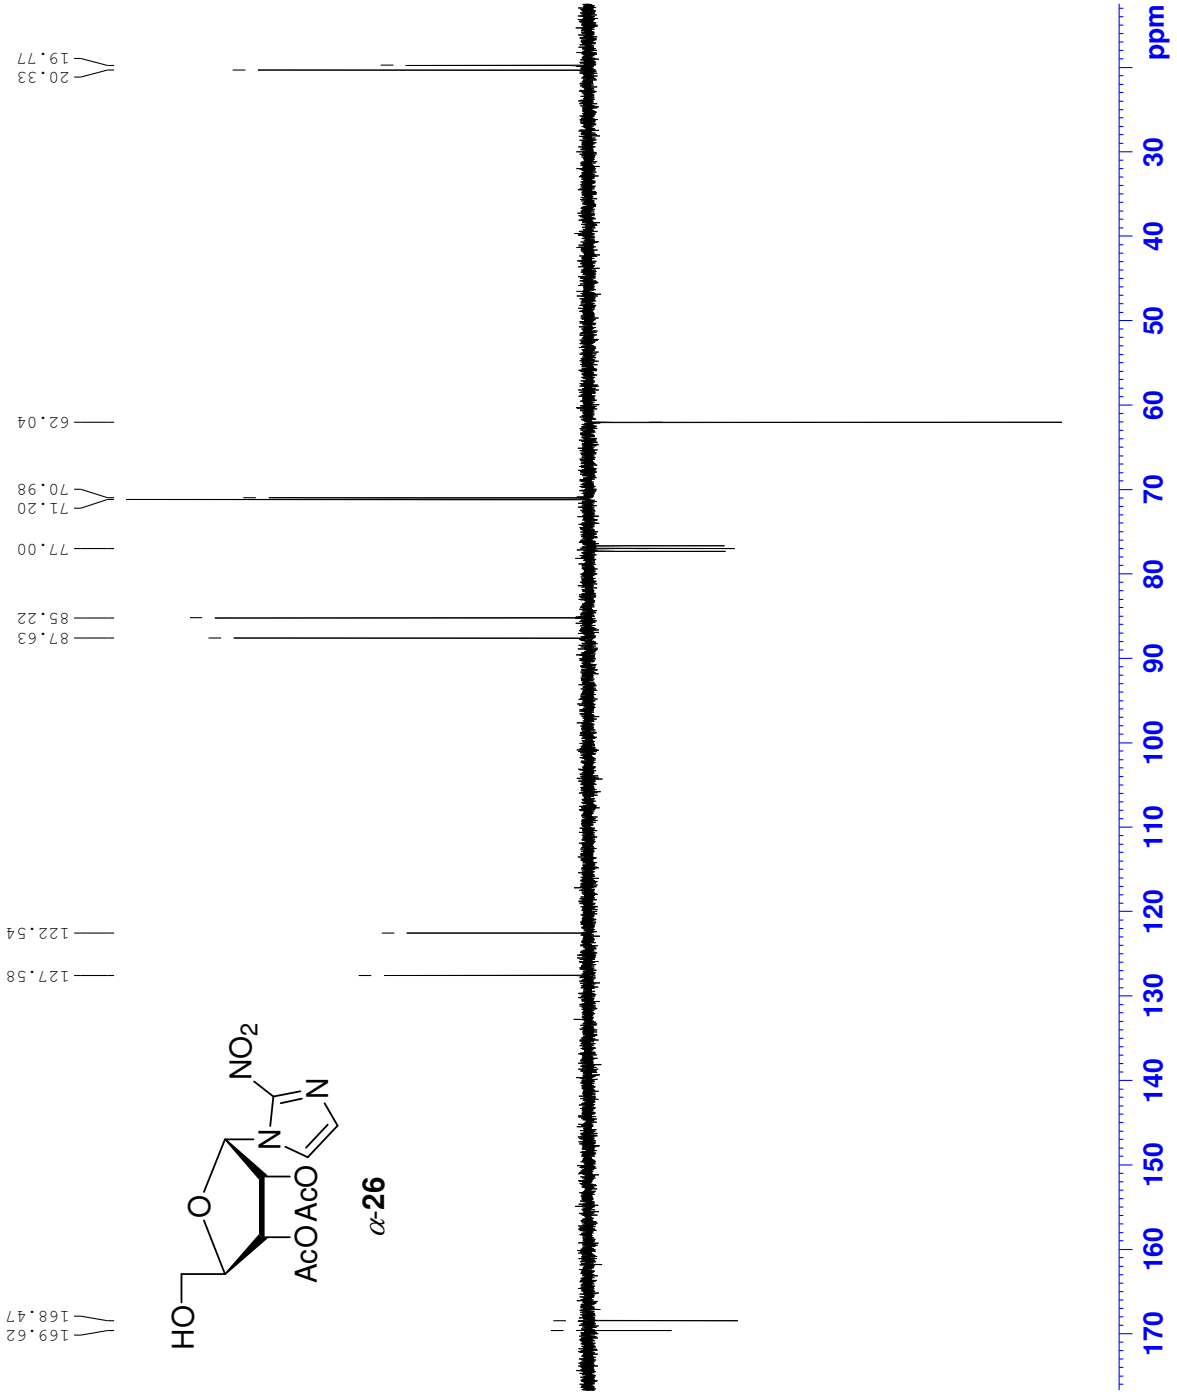

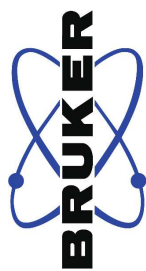

Current Data Parameters  
NAME AW581\_W\_Alpha  
EXPNO 42  
PROCNO 1  
F2 - Acquisition Parameters  
Date\_ 20060403  
Time\_ 15.10  
INSTRUM avance400  
PROBHD 5 mm BBO BB-1H  
PULPROG zgpg30  
TD 65536  
SOLVENT CDCl3  
NS 448  
DS 4  
SWH 23980.814 Hz  
FIDRES 0.365918 Hz  
AQ 1.3664756 sec  
RG 2896.3  
DW 20.850 usec  
DE 6.00 usec  
TE 300.2 K  
D1 2.0000000 sec  
d11 0.0300000 sec  
DELTA 1.8999998 sec  
TD0 1

==== CHANNEL f1 =====  
NUC1 13C  
P1 10.30 usec  
PL1 -1.00 dB  
SFO1 100.6228298 MHz  
==== CHANNEL f2 =====  
CPDPRG2 waltz16  
NUC2 1H  
PCPD2 100.00 usec  
PL2 -3.00 dB  
PL12 16.00 dB  
PL13 20.00 dB  
SFO2 400.1316005 MHz  
F2 - Processing parameters  
SI 32768  
SF 100.6127734 MHz  
WDW no  
SSB 0  
GB 0 Hz  
PC 0

20.33  
19.77

62.04

71.19  
70.98  
77.00

85.22  
87.62

122.54

127.58

144.64

168.47  
169.61

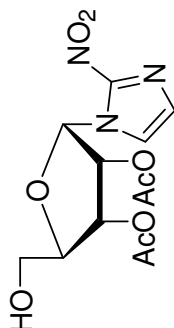

170 160 150 140 130 120 110 100 90 80 70 60 50 40 30 20 ppm

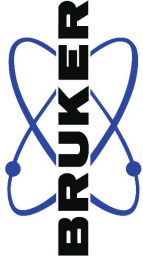

```

Current Data Parameters
NAME      AW602_W1
EXPNO     100
PROCNO    1

F2 - Acquisition Parameters
Date_     20050719
Time      11.42
INSTRUM   avance400
PROBHD    5 mm BBO BB-1H
PULPROG   zg30
TD         65536
SOLVENT   CDCl3
NS         16
DS         2
SWH        8278.146 Hz
FIDRES     0.126314 Hz
AQ         3.9584243 sec
RG         181
DW         60.400 usec
DE         6.00 usec
TE         300.2 K
D1         1.00000000 sec
TD0        1

===== CHANNEL f1 =====
NUC1       1H
P1         8.75 usec
PL1        -3.00 dB
SFO1       400.1324710 MHz

F2 - Processing parameters
SI         32768
SF         400.1300174 MHz
WDW        EM
SSB        0
LB         0.30 Hz
GB         0
PC         1.00
    
```

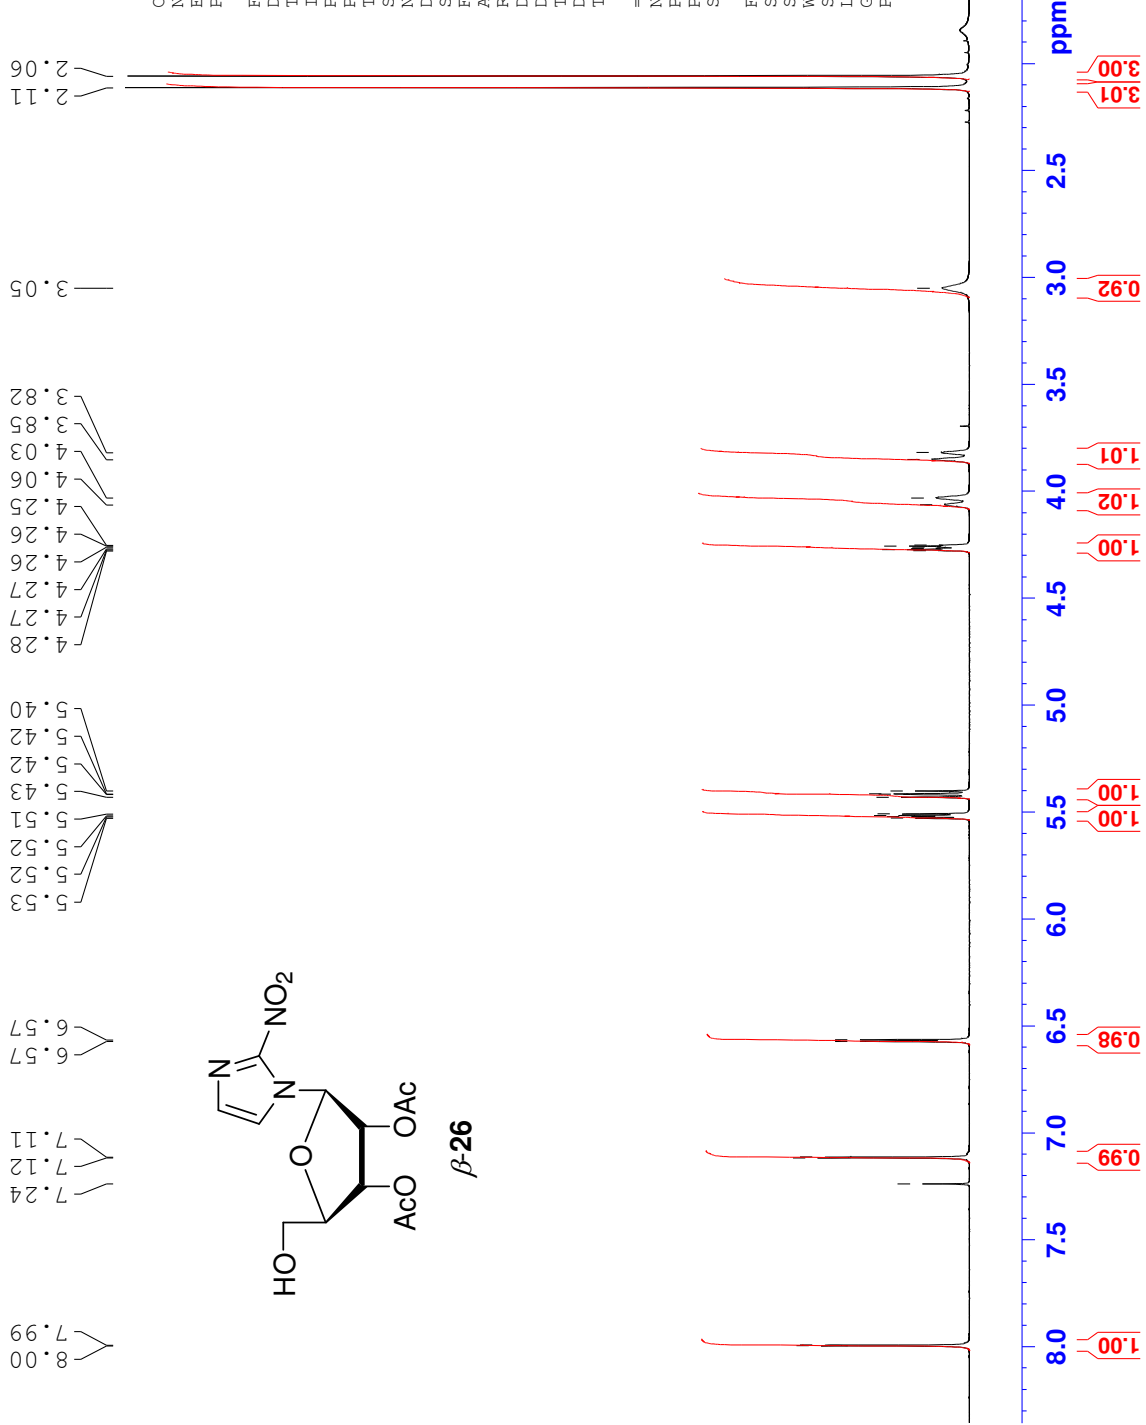



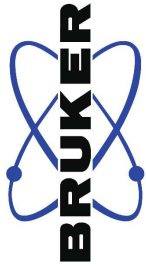

Current Data Parameters  
NAME AW602\_W1  
EXNO 101  
PROCNO 1

F2 - Acquisition Parameters  
Date\_ 20050719  
Time\_ 11.49  
INSTRUM avance400  
PROBHD 5 mm BBO BB-IH  
PULPROG jmod  
TD 65536  
SOLVENT CDCl3  
NS 204  
DS 2  
SWH 25062.656 Hz  
FIDRES 0.382426 Hz  
AQ 1.3074932 sec  
RG 5160.6  
DW 19.950 usec  
DE 6.00 usec  
TE 300.2 K  
CNST2 145.0000000  
CNST11 1.0000000  
D1 2.00000000 sec  
d20 0.00689655 sec  
DELTA 0.00001311 sec  
TD0 1

==== CHANNEL f1 =====  
NUC1 13C  
P1 10.30 usec  
P2 20.60 usec  
PL1 -1.00 dB  
SFO1 100.6233329 MHz

==== CHANNEL f2 =====  
CPDPRG2 waltz16  
NUC2 1H  
PCPD2 100.00 usec  
PL2 -3.00 dB  
PLI2 16.00 dB  
SFO2 400.1316005 MHz

F2 - Processing parameters  
SI 32768  
SF 100.6127733 MHz  
WDW EM  
SSB 0  
LB 1.00 Hz  
GB 0  
FC 1.40

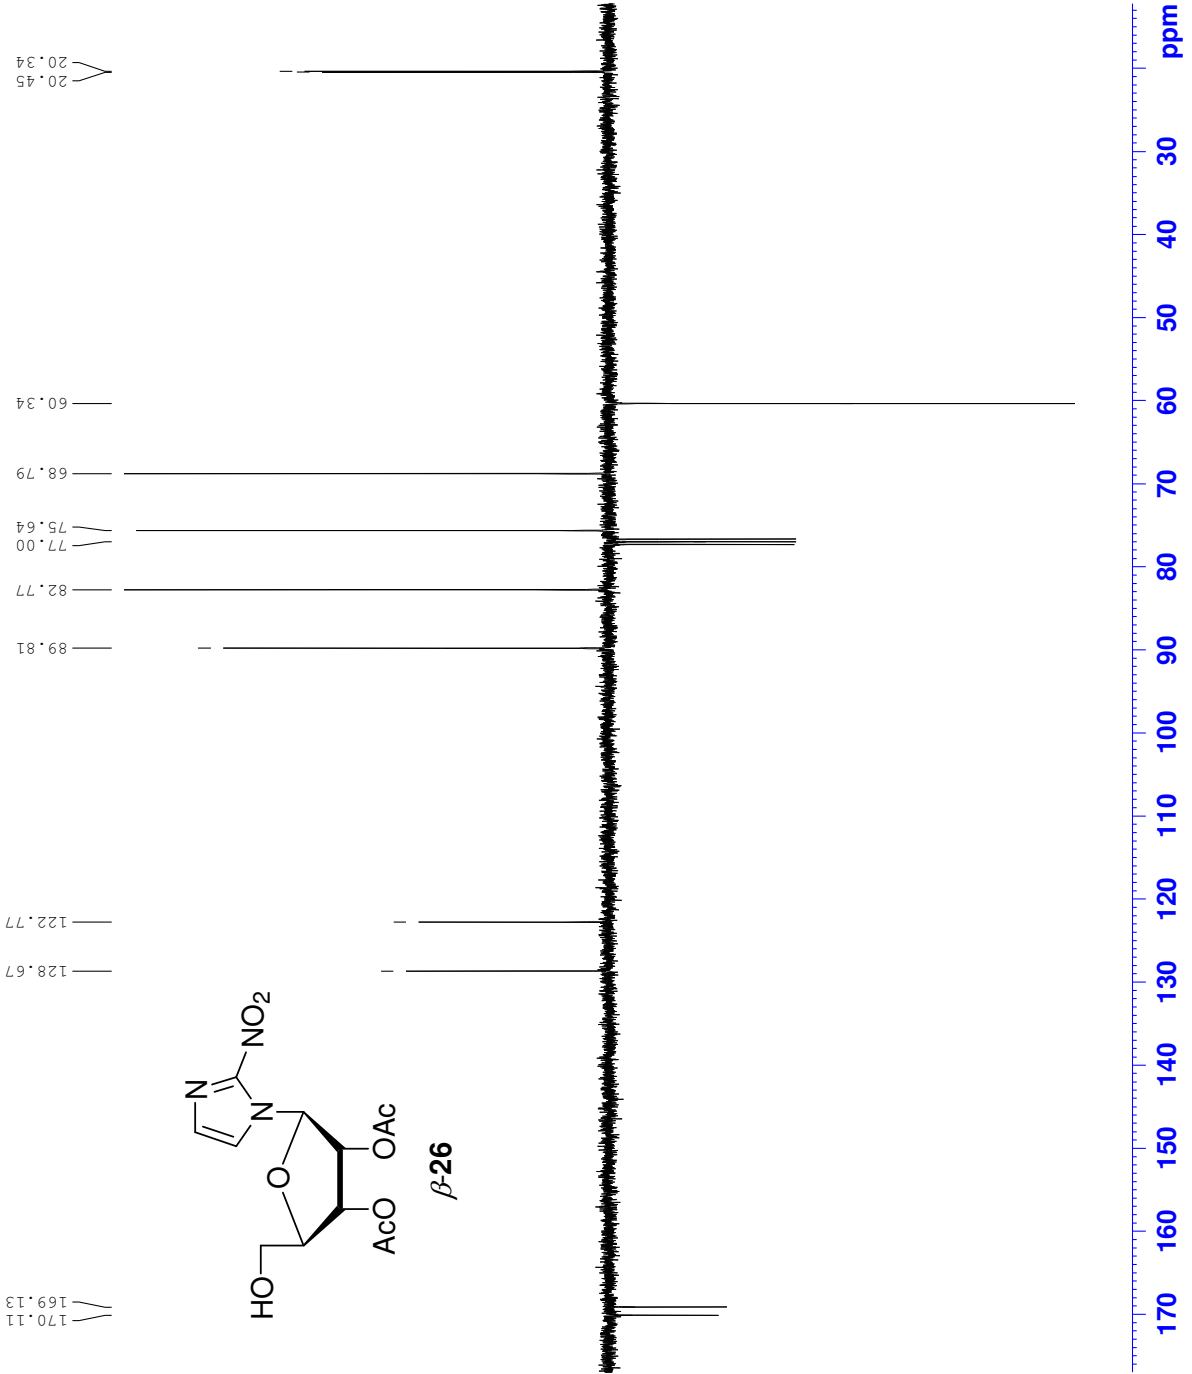

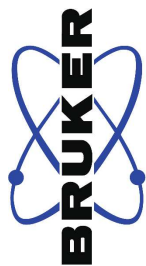

Current Data Parameters  
NAME AW602\_W1  
EXPNO 102  
PROCNO 1

F2 - Acquisition Parameters  
Date\_ 20050719  
Time 12.30  
INSTRUM avance400  
PROBHD 5 mm BBO BB-1H  
PULPROG zgpg30  
TD 65536  
SOLVENT CDCl3  
NS 800  
DS 4  
SWH 23980.814 Hz  
FIDRES 0.365918 Hz  
AQ 1.3664756 sec  
RG 2580.3  
DW 20.850 usec  
DE 6.00 usec  
TE 300.2 K  
D1 2.00000000 sec  
d11 0.03000000 sec  
DELTA 1.89999998 sec  
TD0 1

==== CHANNEL f1 =====  
NUC1 13C  
P1 10.30 usec  
PL1 -1.00 dB  
SFO1 100.6228298 MHz

==== CHANNEL f2 =====  
CPDPRG2 waltz16  
NUC2 1H  
PCPD2 100.00 usec  
PL2 -3.00 dB  
PL12 16.00 dB  
PL13 20.00 dB  
SFO2 400.1316005 MHz

F2 - Processing parameters  
SI 32768  
SF 100.6127734 MHz  
WDW EM  
SSB 0  
LB 1.00 Hz  
GB 0  
PC 1.40

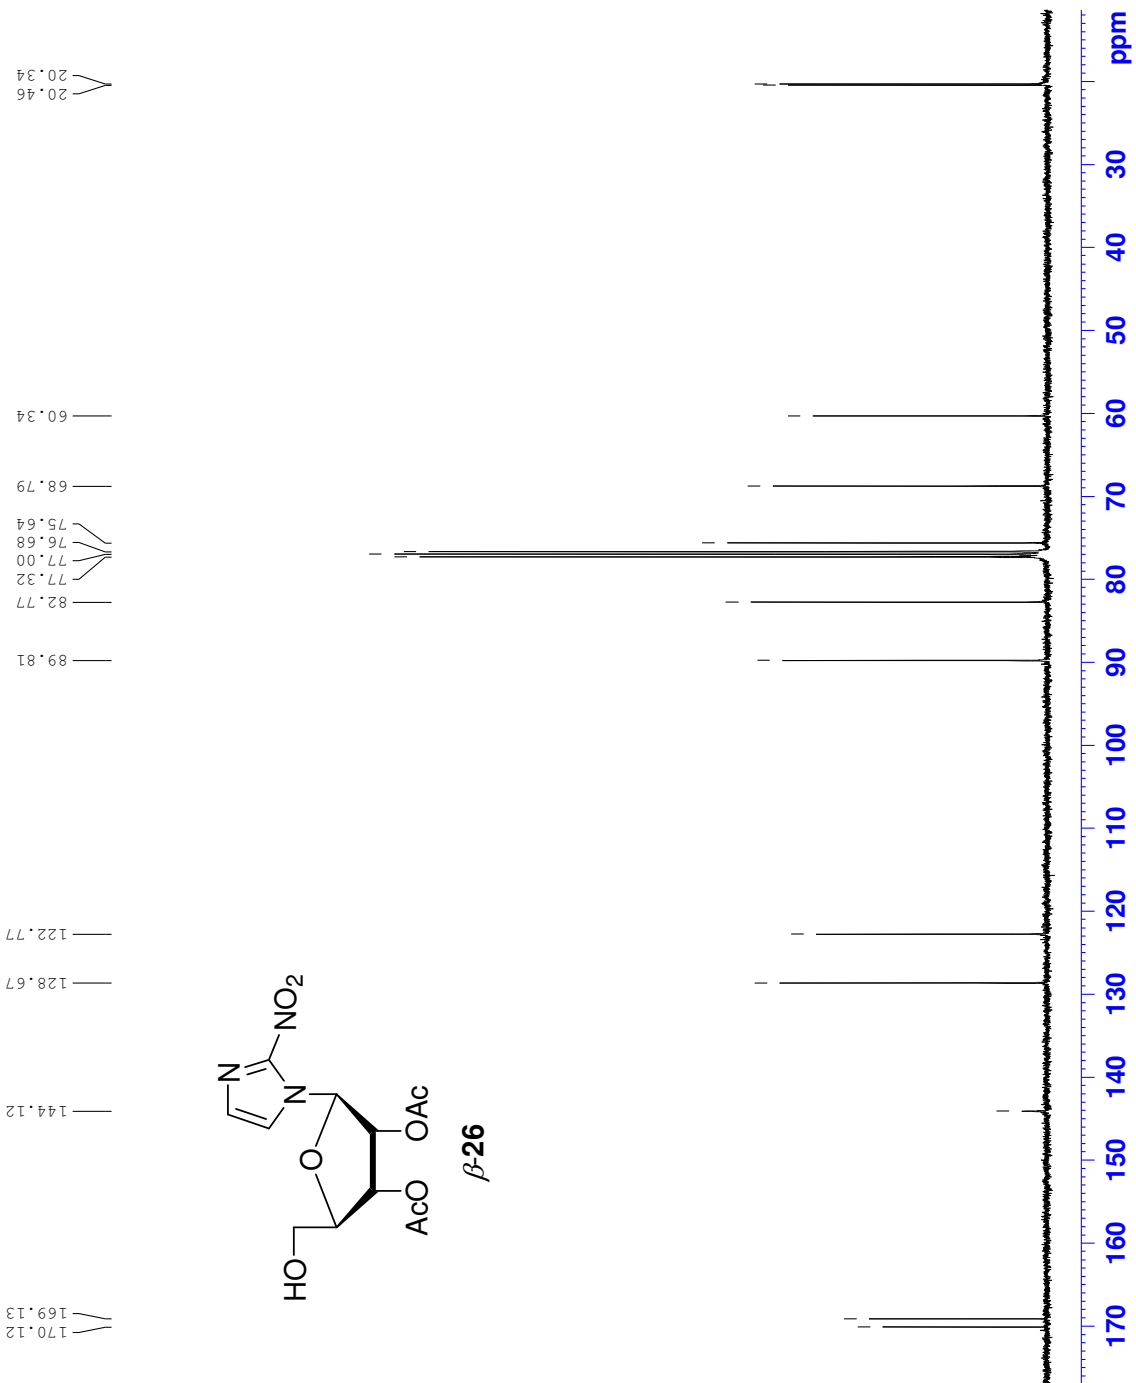

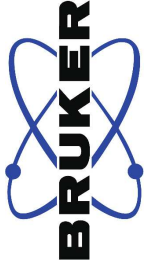

Current Data Parameters  
 NAME AW582\_W1  
 EXPNO 130  
 PROCNO 1

F2 - Acquisition Parameters  
 Date\_ 20041109  
 Time 20.31  
 INSTRUM avance400  
 PROBHD 5 mm Multinucl  
 PULPROG zg30  
 TD 65536  
 SOLVENT CDCl3  
 NS 16  
 DS 2  
 SWH 8278.146 Hz  
 FIDRES 0.126314 Hz  
 AQ 3.9584243 sec  
 RG 143.7  
 DW 60.400 usec  
 DE 6.00 usec  
 TE 300.0 K  
 D1 1.0000000 sec

==== CHANNEL f1 =====  
 NUC1 1H  
 P1 9.80 usec  
 PL1 3.00 dB  
 SF01 400.1324710 MHz

F2 - Processing parameters  
 SI 32768  
 SF 400.1300174 MHz  
 WDW no  
 SSB 0  
 LB 0 Hz  
 GB 0  
 PC 1.00

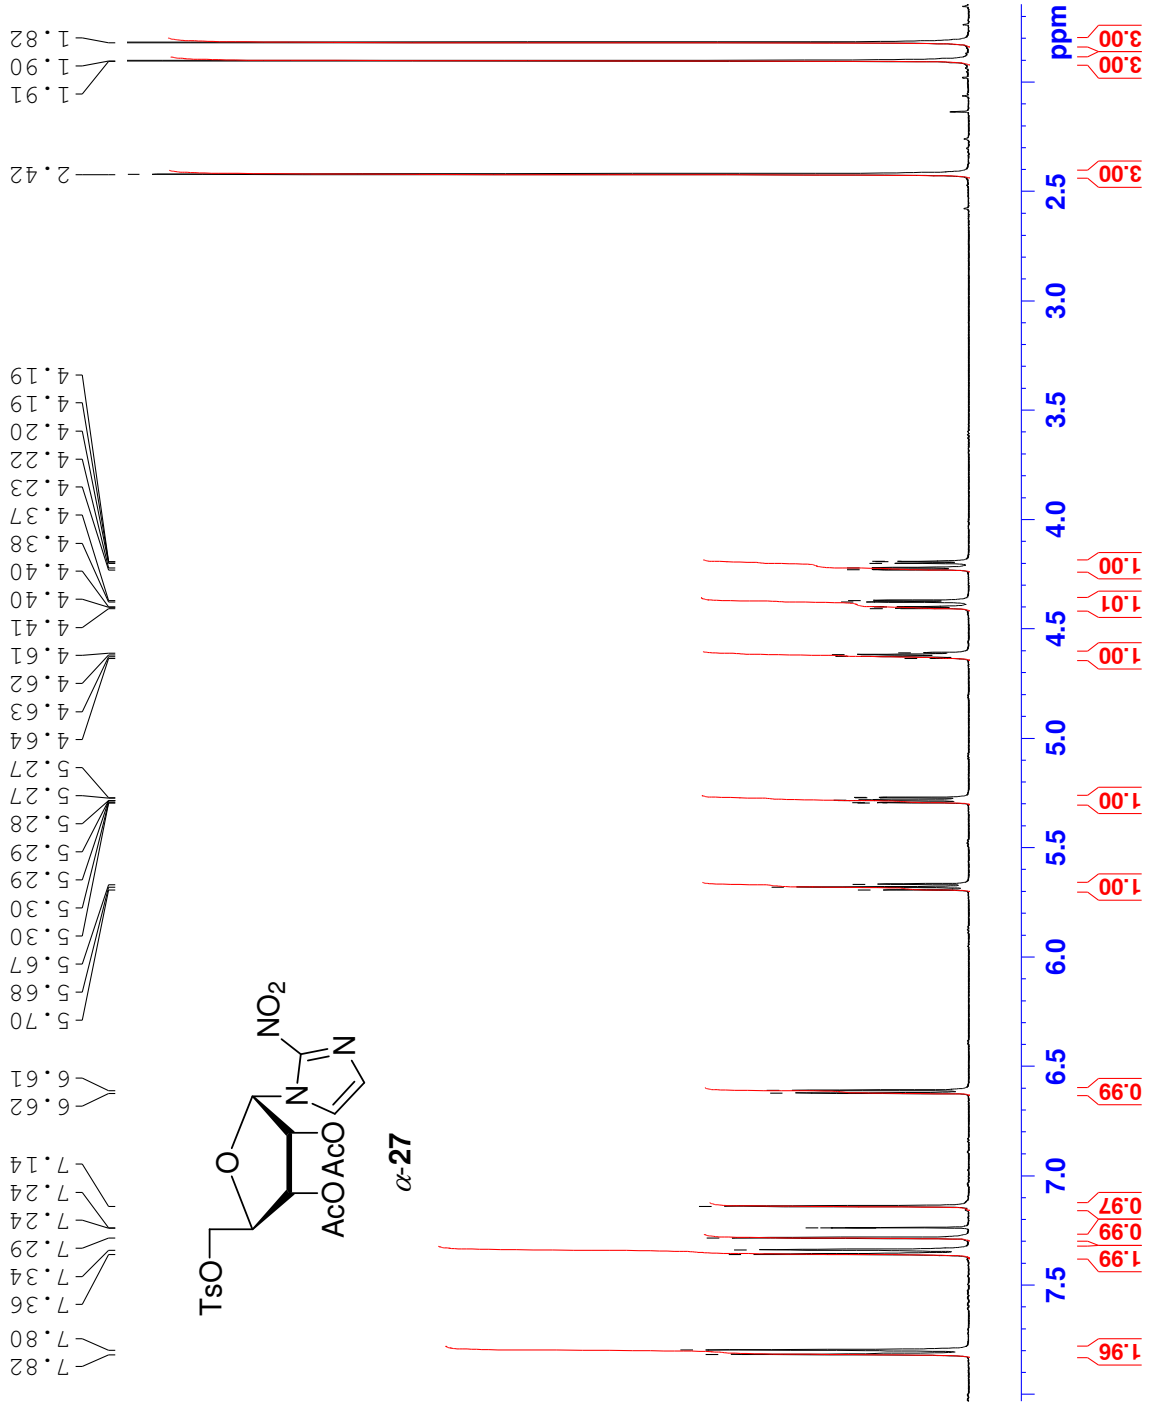

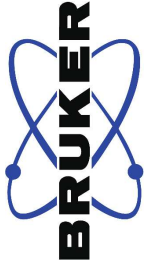

Current Data Parameters  
 NAME AW582\_W1  
 EXPNO 131  
 PROCNO 1

F2 - Acquisition Parameters  
 Date\_ 20041109  
 Time 21.56  
 INSTRUM advance400  
 PROBDH 5 mm Multinucl  
 PULPROG jmod  
 TD 65536  
 SOLVENT CDCl3  
 NS 1500  
 DS 2  
 SWH 25062.656 Hz  
 FIDRES 0.382426 Hz  
 AQ 1.3074932 sec  
 RG 4096  
 DW 19.950 usec  
 DE 6.00 usec  
 TE 300.0 K  
 CNST2 145.0000000  
 CNST11 1.0000000  
 d1 2.0000000 sec  
 d13 0.00000300 sec  
 d20 0.00689655 sec  
 DELTA 0.00001401 sec

==== CHANNEL f1 =====  
 NUC1 13C  
 P1 11.00 usec  
 P2 22.00 usec  
 PL1 -6.00 dB  
 SFO1 100.6232933 MHz

==== CHANNEL f2 =====  
 CPDPRG2 wa1tz16  
 NUC2 1H  
 PCPD2 100.00 usec  
 PL2 3.00 dB  
 PL12 22.00 dB  
 SFO2 400.1316005 MHz

F2 - Processing parameters  
 SI 32768  
 SF 100.6127718 MHz  
 WDW EM  
 SSB 0  
 LB 0.30 Hz  
 GB 0  
 PC 1.40

21.64  
20.20  
19.70

87.47  
81.62  
77.00  
70.51  
70.40  
67.99

169.12  
168.03  
145.66  
130.11  
127.79  
122.23

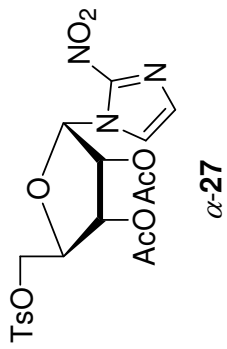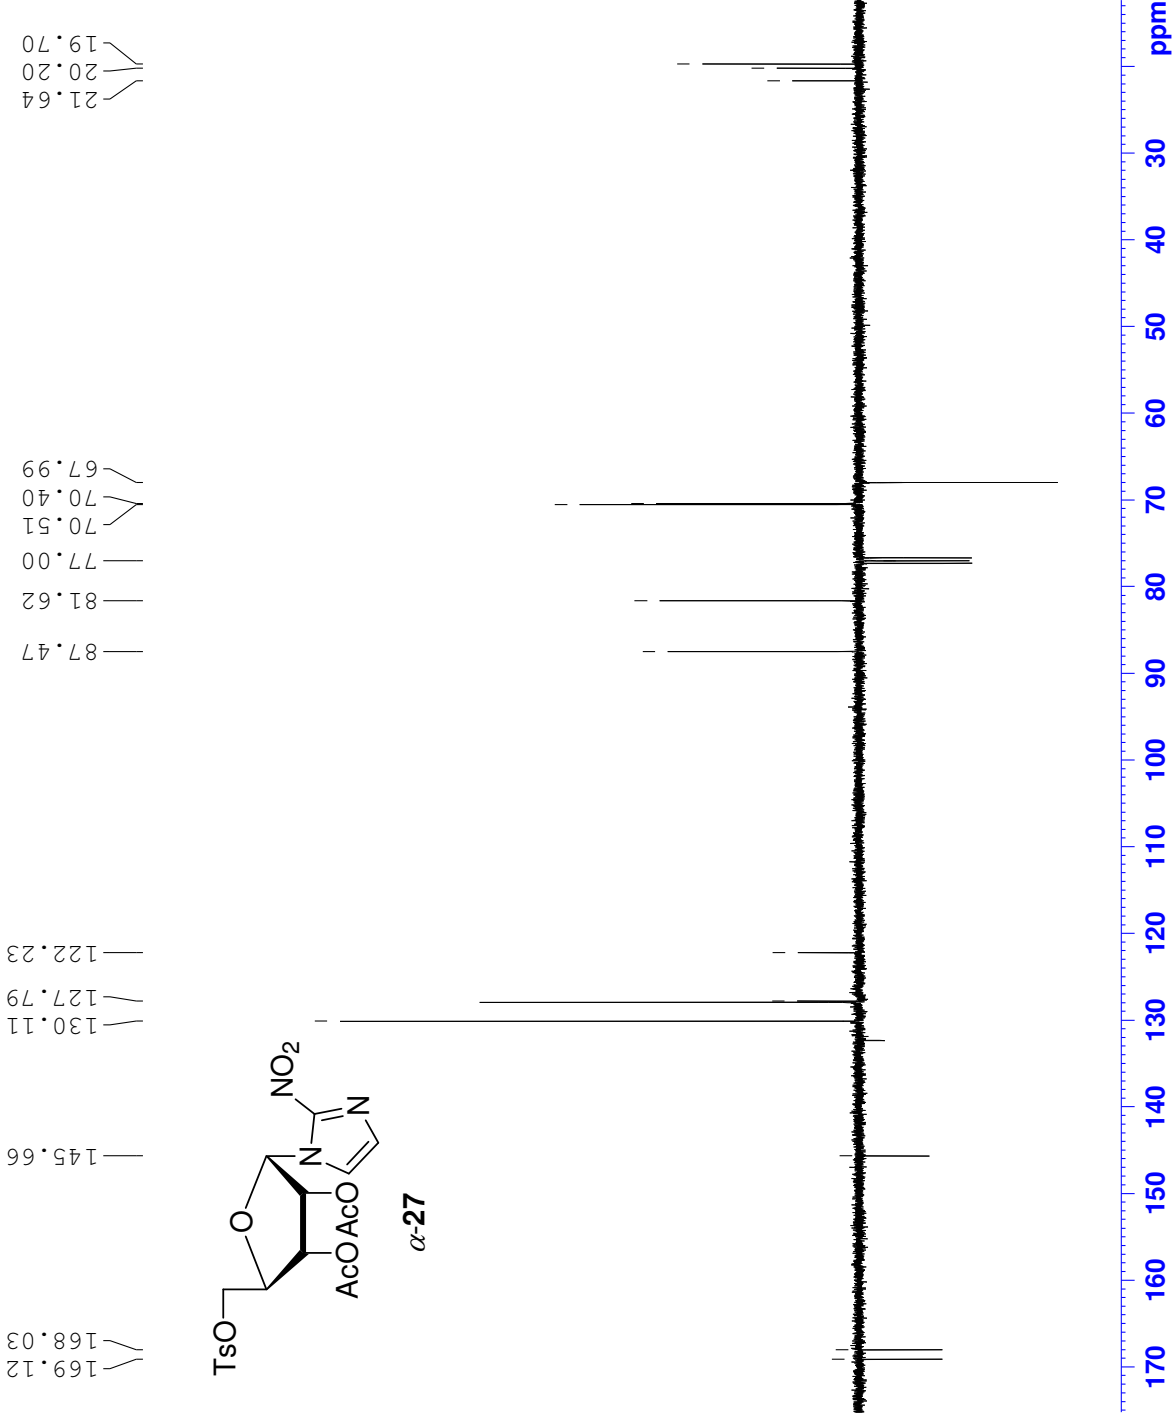

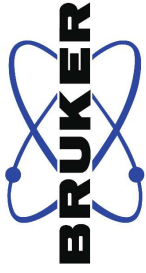

Current Data Parameters  
 NAME AW582\_W1  
 EXPNO 50  
 PROCNO 1

F2 - Acquisition Parameters  
 Date\_ 20041111  
 Time\_ 12.49  
 INSTRUM advance400  
 PROBHD 5 mm Dual 13C/  
 PULPROG zgpg30  
 TD 65536  
 SOLVENT CDCl3  
 NS 600  
 DS 4  
 SMH 23980.814 Hz  
 FIDRES 0.365918 Hz  
 AQ 1.3664756 sec  
 RG 3649.1  
 DW 20.850 usec  
 DE 6.00 usec  
 TE 300.0 K  
 D1 2.00000000 sec  
 d11 0.03000000 sec  
 d12 0.00002000 sec

==== CHANNEL f1 =====  
 NUC1 13C  
 P1 10.00 usec  
 PL1 0 dB  
 SF01 100.6228298 MHz  
 ===== CHANNEL f2 =====  
 CPDPRG2 waltz16  
 NUC2 1H  
 PCPD2 100.00 usec  
 PL2 -4.00 dB  
 PL12 14.00 dB  
 PL13 16.00 dB  
 SF02 400.1316005 MHz  
 F2 - Processing parameters  
 SI 32768  
 SF 100.6127731 MHz  
 WDW EM  
 SSB 0  
 LB 0.30 Hz  
 GB 0  
 PC 1.40

21.63  
 20.19  
 19.70

70.50  
 70.38  
 67.99

132.32  
 130.10  
 127.93  
 127.78  
 122.23

145.65  
 144.46

169.12  
 168.03

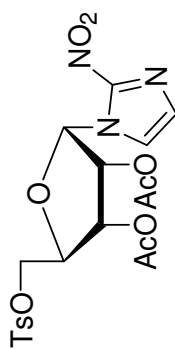

$\alpha$ -27

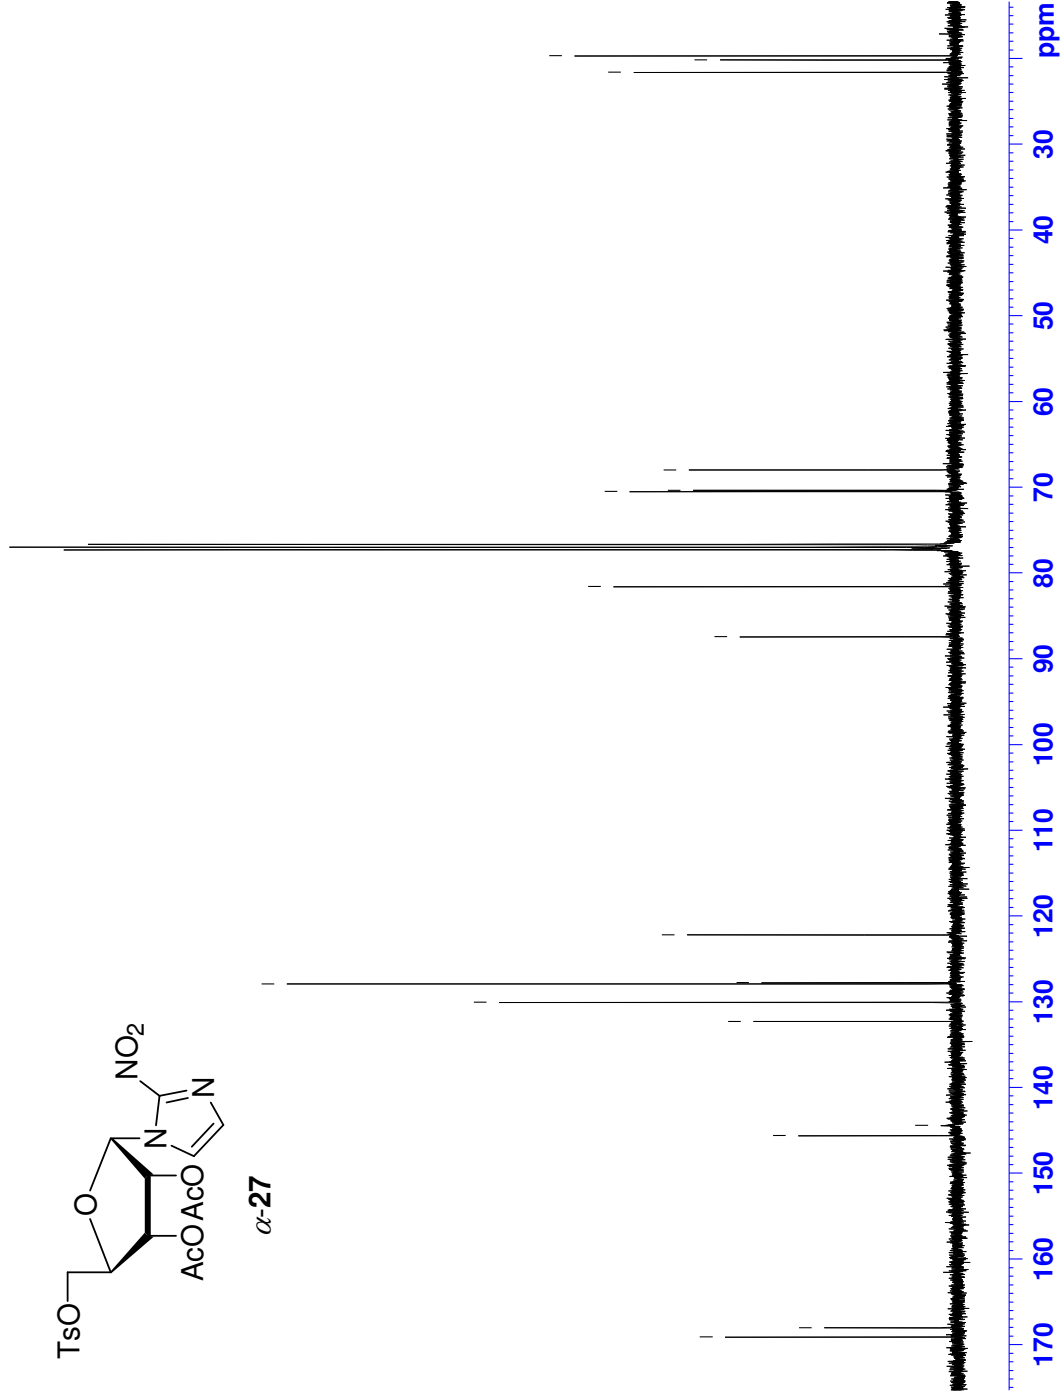

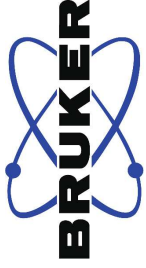

Current Data Parameters  
 NAME AW604\_W  
 EXPNO 10  
 PROCNO 1

F2 - Acquisition Parameters  
 Date\_ 20050118  
 Time\_ 10.43  
 INSTRUM advance400  
 PROBHD 5 mm BBO BB-1H  
 PULPROG zg30  
 TD 65536  
 SOLVENT CDCl3  
 NS 16  
 DS 2  
 SWH 8278.146 Hz  
 FIDRES 0.126314 Hz  
 AQ 3.9584243 sec  
 RG 256  
 DW 60.400 usec  
 DE 6.00 usec  
 TE 300.0 K  
 D1 1.0000000 sec

==== CHANNEL f1 =====  
 NUC1 1H  
 P1 8.75 usec  
 PL1 -3.00 dB  
 SFO1 400.1324710 MHz

F2 - Processing parameters  
 SI 32768  
 SF 400.1300173 MHz  
 WDW no  
 SSB 0  
 LB 0 Hz  
 GB 0  
 PC 1.00

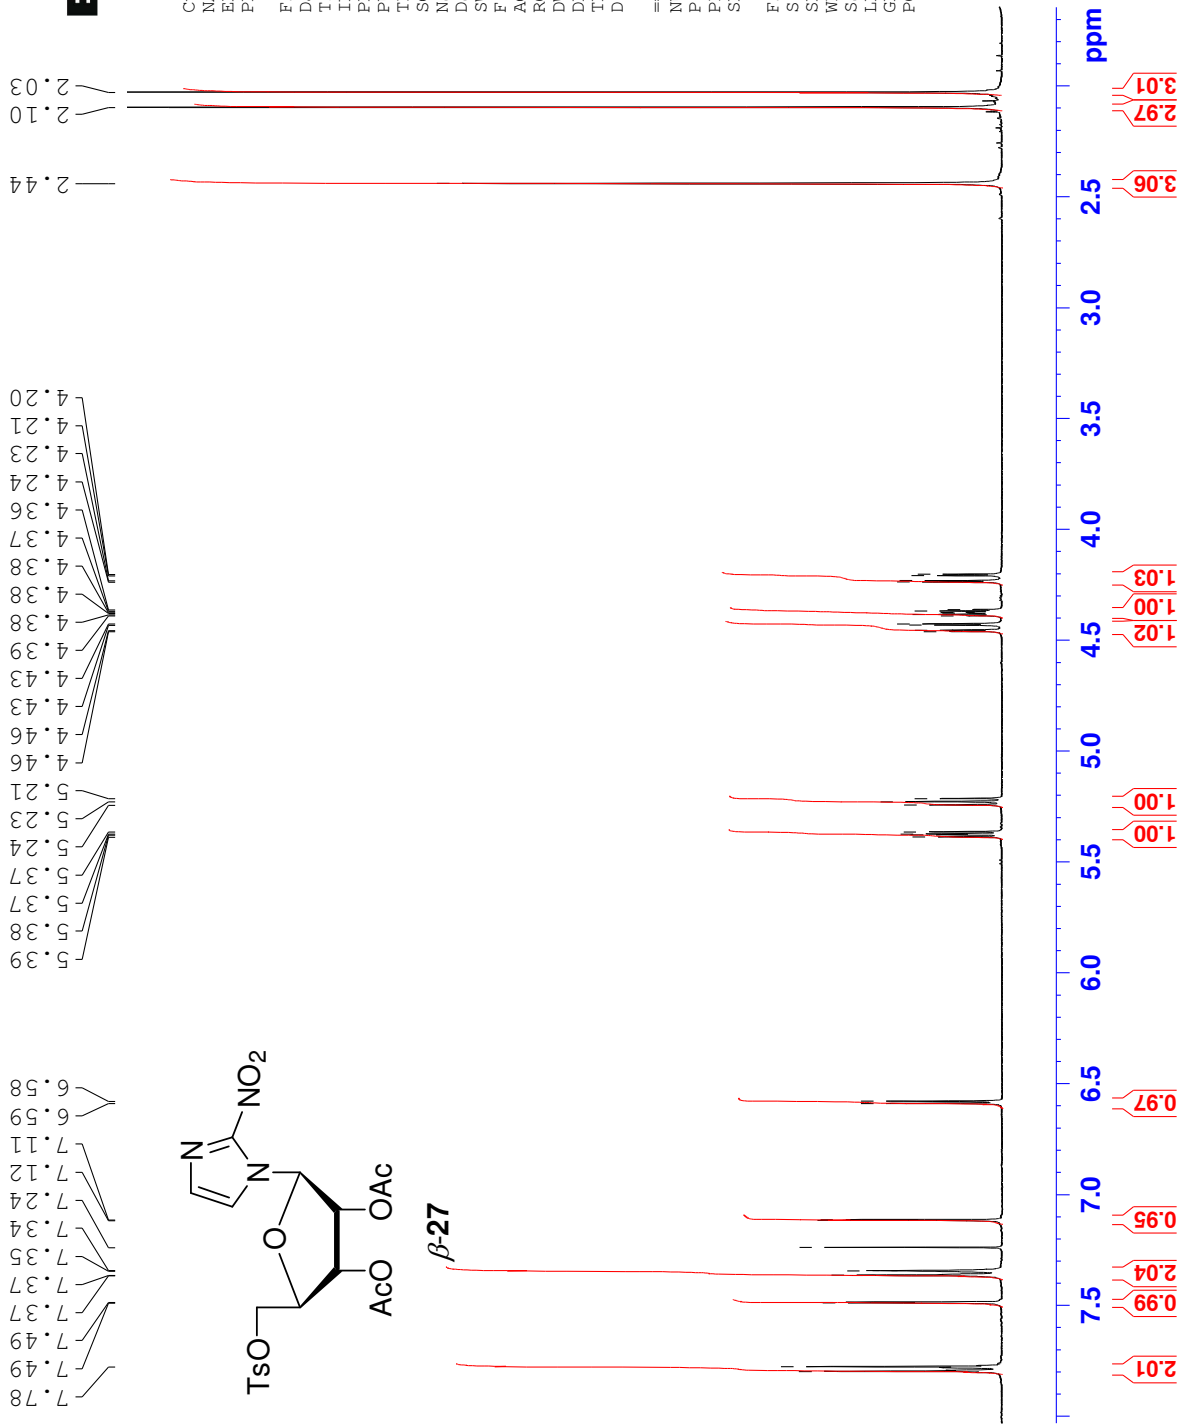

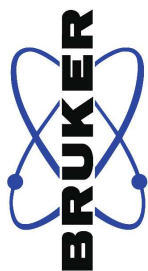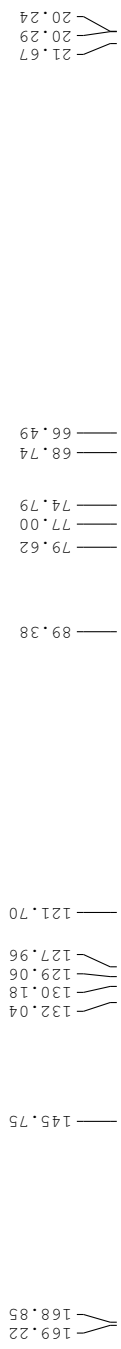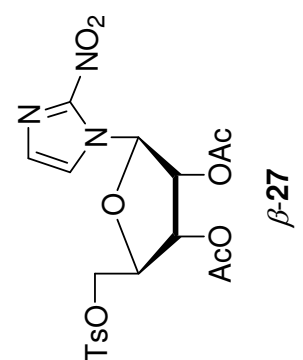

Current Data Parameters  
NAME AW604\_W  
EXPNO 11  
PROCNO 1

F2 - Acquisition Parameters  
Date\_ 20050118  
Time 10.50  
INSTRUM avance400  
PROBHD 5 mm BBO BB-IH  
PULPROG jmod  
TD 65536  
SOLVENT CDCl3  
NS 449  
DS 2  
SWH 25062.656 Hz  
FIDRES 0.382426 Hz  
AQ 1.3074932 sec  
RG 2580.3  
DW 19.950 usec  
DE 6.00 usec  
TE 300.0 K  
CNST2 145.000000  
CNST11 1.000000  
D1 2.00000000 sec  
d13 0.0000300 sec  
d20 0.00689655 sec  
DELTA 0.00001311 sec

==== CHANNEL f1 =====  
NUC1 13C  
P1 10.30 usec  
P2 20.60 usec  
PL1 -1.00 dB  
SFO1 100.6232933 MHz

==== CHANNEL f2 =====  
CPDPRG2 waltz16  
NUC2 1H  
PCPD2 100.00 usec  
PL2 -3.00 dB  
PL12 16.00 dB  
SFO2 400.1316005 MHz

F2 - Processing parameters  
SI 32768  
SF 100.6127713 MHz  
WDW EM  
SSB 0  
LB 0  
GB 0  
PC 1.40

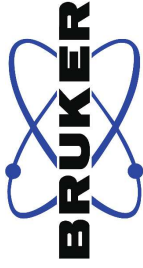

Current Data Parameters  
 NAME AW604\_W  
 EXPNO 50  
 PROCNO 1

F2 - Acquisition Parameters  
 Date\_ 20050119  
 Time 14.00  
 INSTRUM avance400  
 PROBHD 5 mm BBO BB-IH  
 PULPROG zgpg30  
 TD 65536  
 SOLVENT CDCl3  
 NS 600  
 DS 4  
 SWH 23980.814 Hz  
 FIDRES 0.365918 Hz  
 AQ 1.3664756 sec  
 RG 4096  
 DW 20.850 usec  
 DE 6.00 usec  
 TE 300.0 K  
 D1 2.00000000 sec  
 d11 0.03000000 sec  
 d12 0.00002000 sec

==== CHANNEL f1 =====  
 NUC1 13C  
 P1 10.30 usec  
 PL1 -1.00 dB  
 SFO1 100.6228298 MHz

==== CHANNEL f2 =====  
 CPDPRG2 waltz16  
 NUC2 1H  
 PCPD2 100.00 usec  
 PL2 -3.00 dB  
 PL12 16.00 dB  
 PL13 20.00 dB  
 SFO2 400.1316005 MHz

F2 - Processing parameters  
 SI 32768  
 SF 100.6127717 MHz  
 WDM EM  
 SSB 0  
 LB 0.30 Hz  
 GB 0  
 PC 1.40

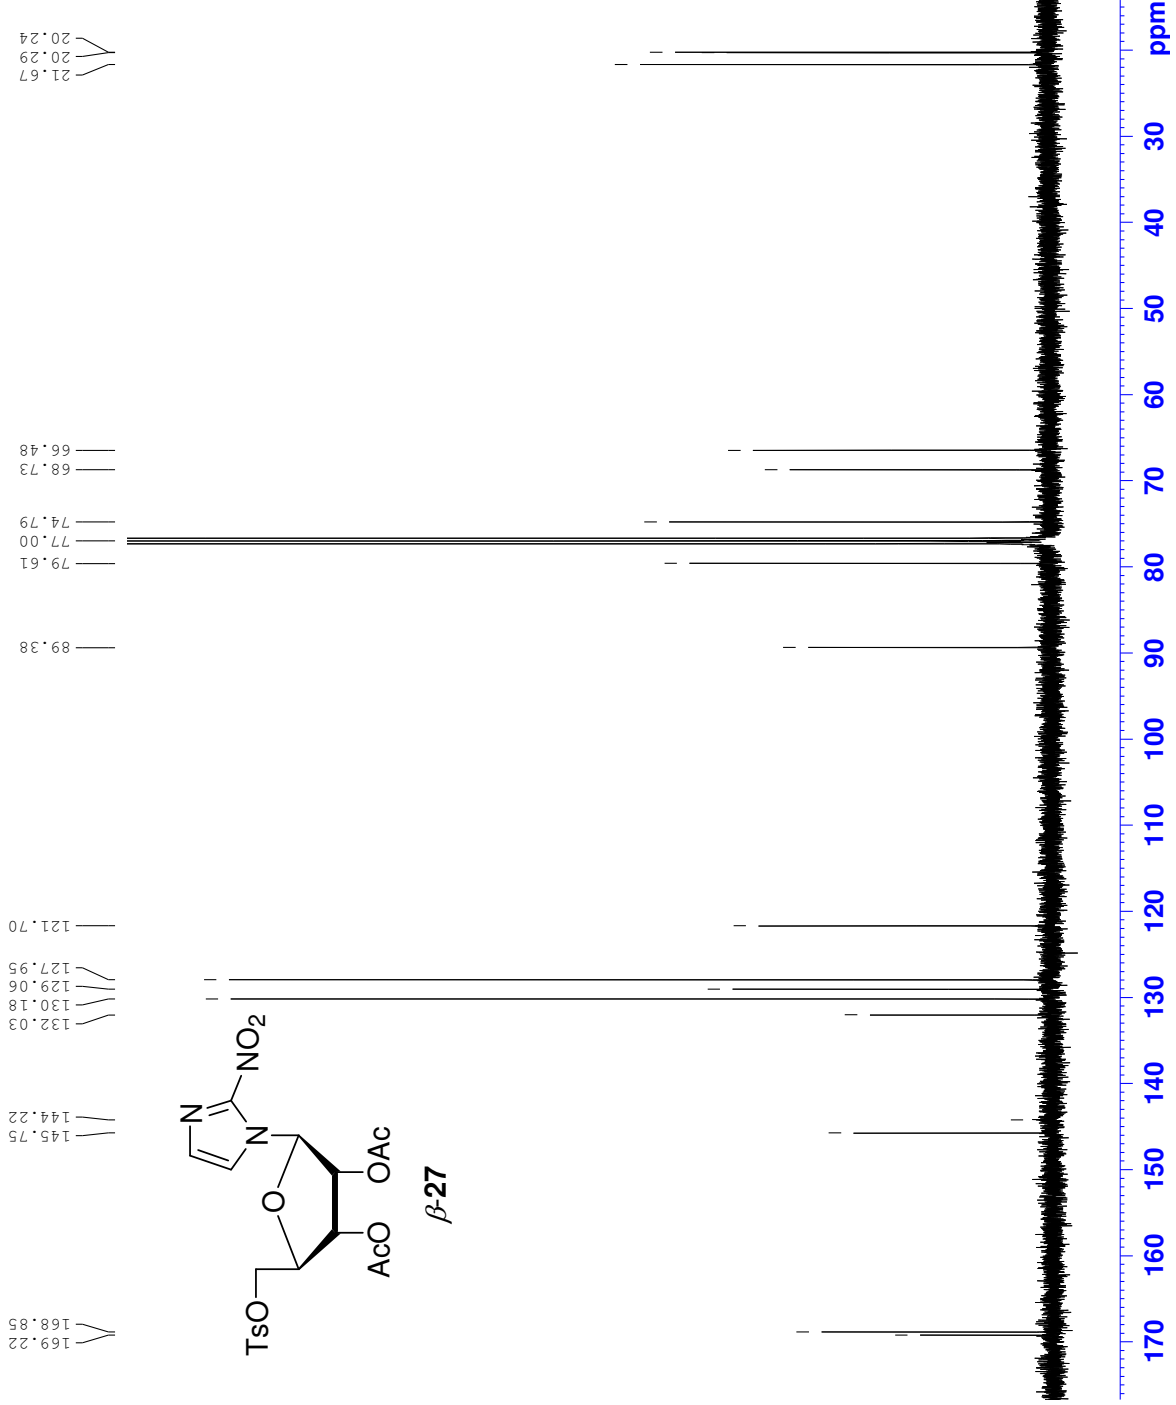



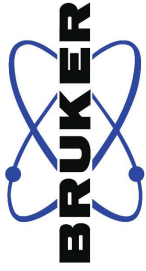

Current Data Parameters  
 NAME AW579\_W\_Alpha  
 EXPNO 191  
 PROCNO 1

F2 - Acquisition Parameters  
 Date\_ 20040908  
 Time 16.20  
 INSTRUM avance400  
 PROBHD 5 mm PABBO BB-  
 PULPROG zg30  
 ID 65536  
 SOLVENT DMSO  
 NS 16  
 DS 2  
 SWH 8278.146 Hz  
 FIDRES 0.126314 Hz  
 AQ 3.9584243 sec  
 RG 90.5  
 DW 60.400 usec  
 DE 6.00 usec  
 TE 300.0 K  
 D1 1.0000000 sec

==== CHANNEL f1 =====  
 NUC1 1H  
 P1 8.75 usec  
 PL1 -3.00 dB  
 SF01 400.1324710 MHz

F2 - Processing parameters  
 SI 32768  
 SF 400.1300029 MHz  
 WDW no  
 SSB 0  
 LB 0 Hz  
 GB 0  
 PC 1.00

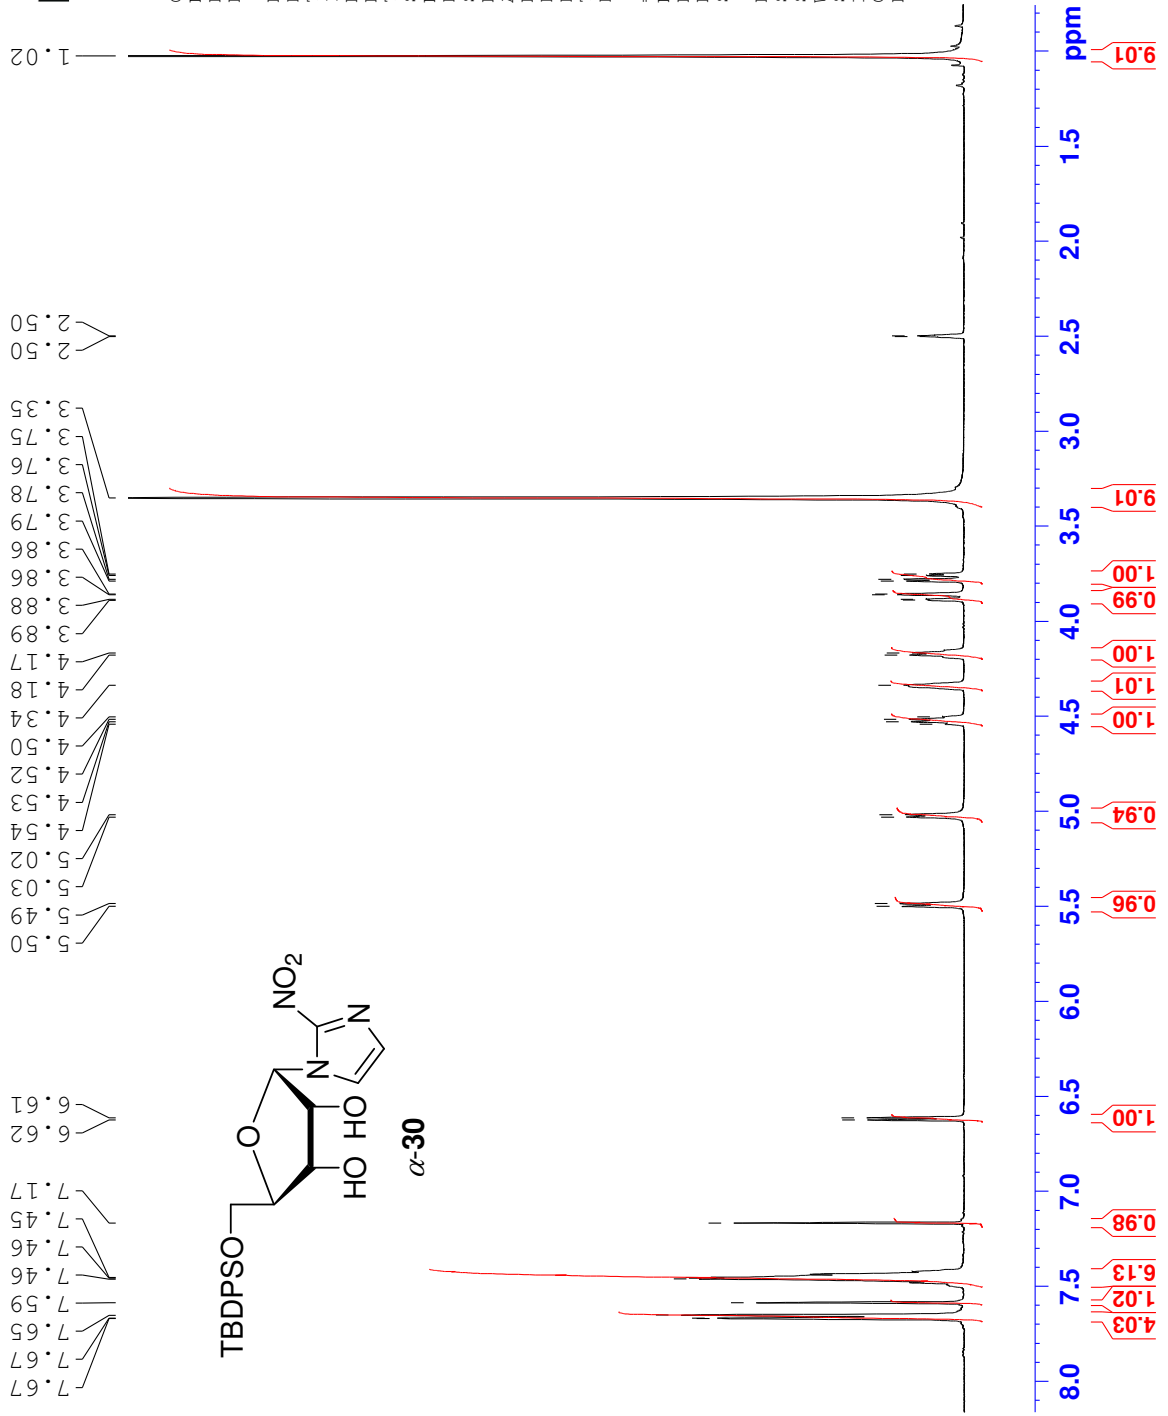

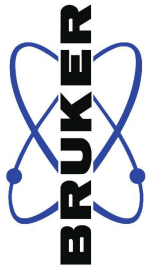

Current Data Parameters  
NAME AWS79\_W\_Alpha  
EXPNO 190  
PROCNO 1

F2 - Acquisition Parameters  
Date\_ 20040908  
Time 16.17  
INSTRUM avance400  
PROBHD 5 mm PABBO BB-  
PULPROG jmod  
TD 65536  
SOLVENT DMSO  
NS 800  
DS 2  
SWH 25062.656 Hz  
FIDRES 0.382426 Hz  
AQ 1.3074932 sec  
RG 13004  
DW 19.950 usec  
DE 6.00 usec  
TE 300.0 K  
CNST2 145.000000  
CNST11 1.000000  
D1 2.0000000 sec  
d13 0.00000300 sec  
d20 0.00689655 sec  
DELTA 0.00001311 sec

==== CHANNEL f1 =====  
NUC1 13C  
P1 10.30 usec  
P2 20.60 usec  
PL1 -1.00 dB  
SFO1 100.6232933 MHz

==== CHANNEL f2 =====  
CPDPRG2 waltz16  
NUC2 1H  
PCPD2 100.00 usec  
PL2 -3.00 dB  
PL12 16.00 dB  
SFO2 400.1316005 MHz

F2 - Processing parameters  
SI 32768  
SF 100.6128167 MHz  
WDW no  
SSB 0 Hz  
LB 0  
GB 0  
PC 1.40

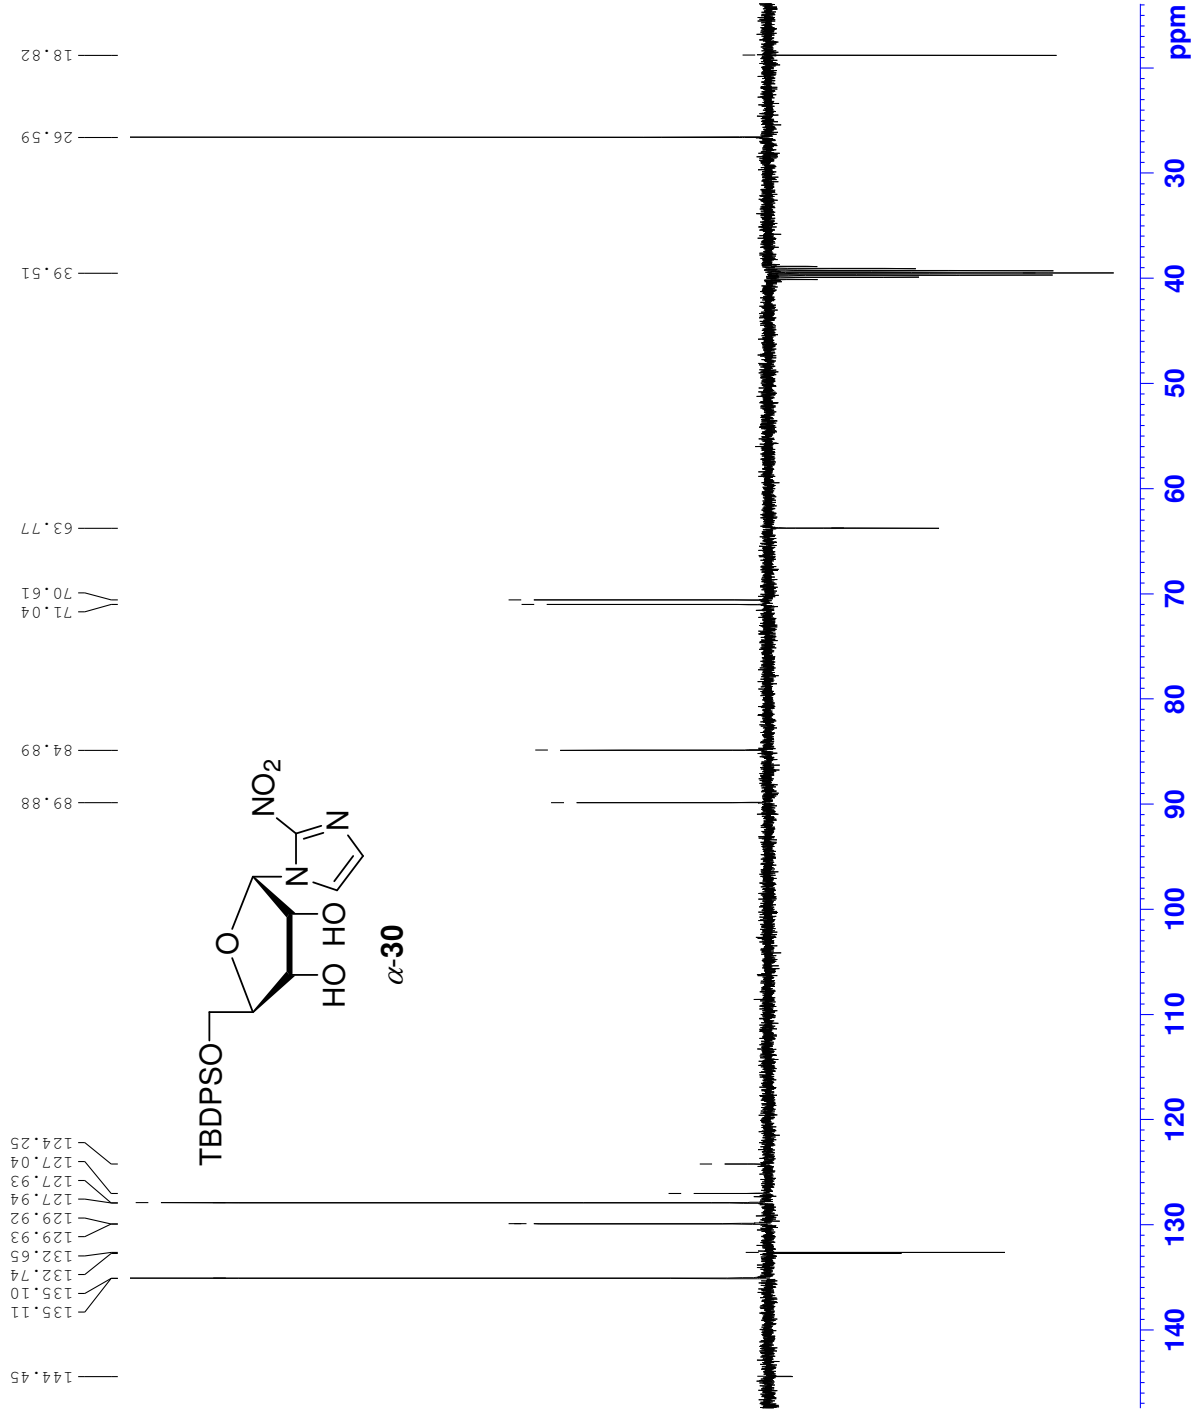

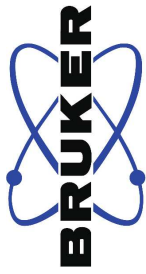

Current Data Parameters  
NAME AW579\_W\_Alpha  
EXPNO 192  
PROCNO 1

F2 - Acquisition Parameters  
Date\_ 20040908  
Time\_ 17.06  
INSTRUM avance400  
PROBHD 5 mm PABBO BB-  
PULPROG zgpg30  
TD 65536  
SOLVENT DMSO  
NS 800  
DS 4  
SWH 23980.814 Hz  
FIDRES 0.365918 Hz  
AQ 1.3664756 sec  
RG 2048  
DE 20.850 usec  
TE 300.0 K  
D1 2.0000000 sec  
d11 0.0300000 sec  
d12 0.0000200 sec

==== CHANNEL f1 =====  
NUC1 13C  
P1 10.30 usec  
PL1 -1.00 dB  
SFO1 100.628298 MHz

==== CHANNEL f2 =====  
CPDPRG2 waltz16  
NUC2 1H  
PCPD2 100.00 usec  
PL2 -3.00 dB  
PL12 16.00 dB  
PL13 20.00 dB  
SFO2 400.1316005 MHz

F2 - Processing parameters  
SI 32768  
SF 100.6128168 MHz  
WDW no  
SSB 0  
LB 0 Hz  
GB 0  
PC 1.40

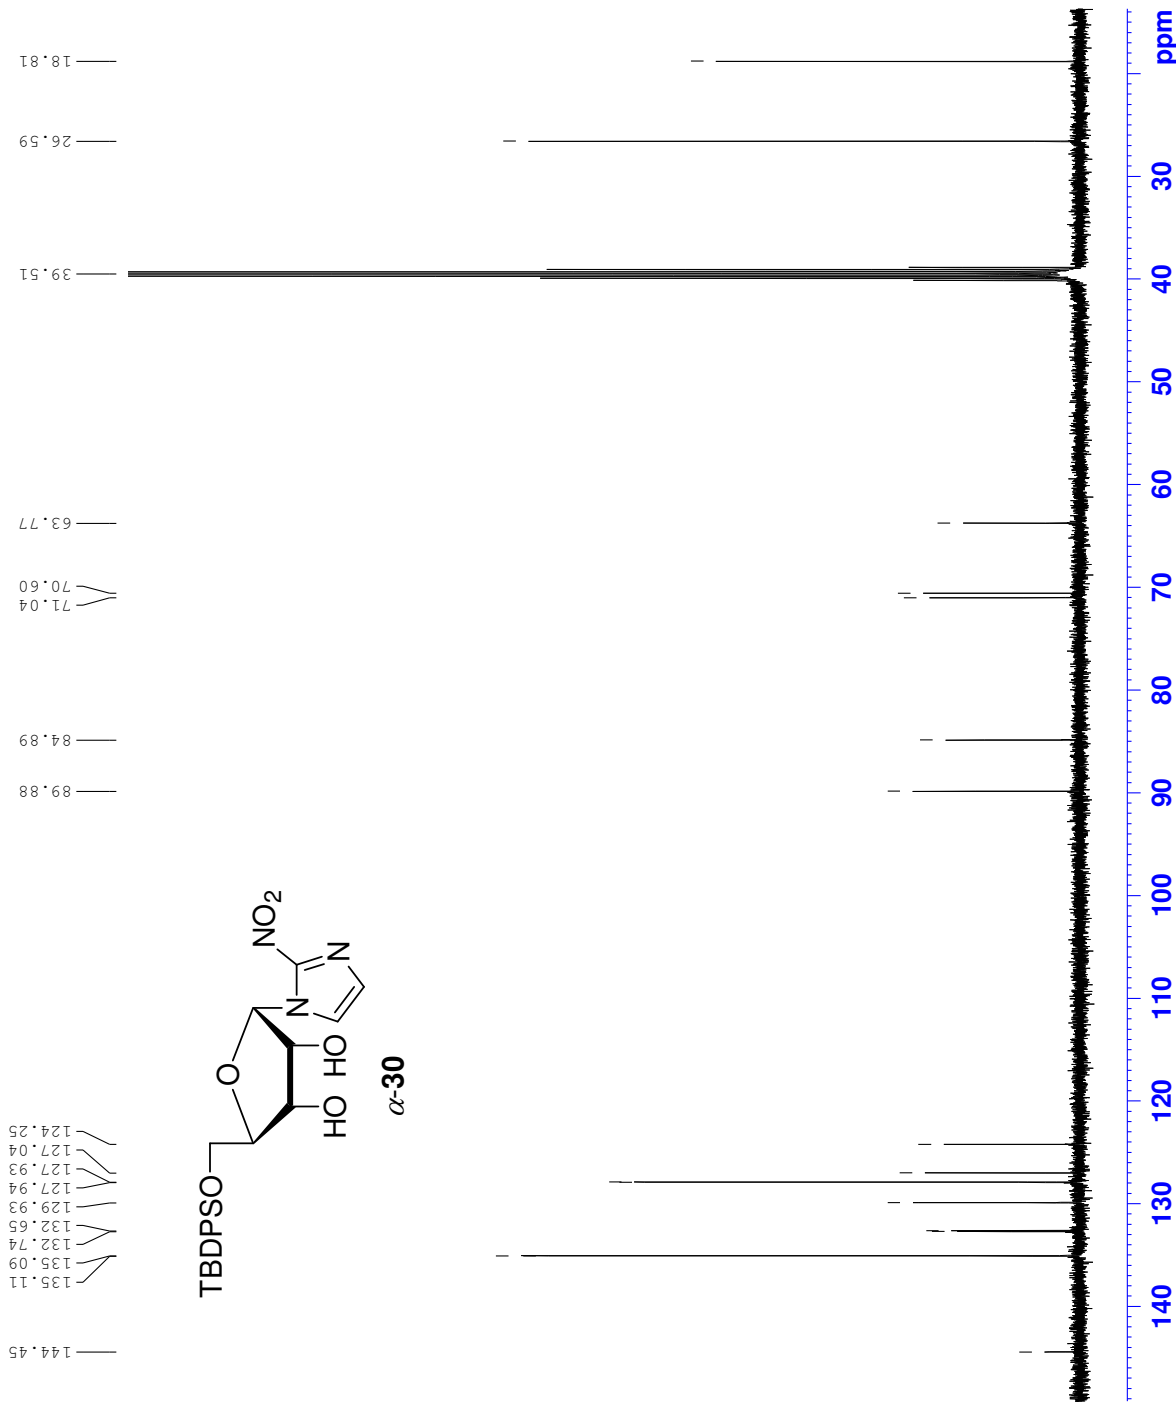

Supplement: jo200727k_si_001.pdf [file jo200727k_si_001.pdf]
